# Supplementary material for: Synthesis and stability study of isocyano aryl boronate esters and their synthetic applications
Source: Royal Society of Chemistry journal article supplement (doi:10.1039/c5ra27624a), 2016-01-01
Supplement: c5ra27624a1.pdf [file c5ra27624a1.pdf]

Electronic Supplementary Material (ESI) for RSC Advances. This journal is © The  
Royal Society of Chemistry 2016

## **Supporting Information**

### **Synthesis and Stability Study of Isocyano Aryl Boronate Esters and their Synthetic Applications**

Hao-Ping Fang, Chia-Chieh Fu, Chin-Kuen Tai, Ken-Hao Chang, Ru-Han Yang,  
Meng-Ju Wu, Hsien-Chi Chen, Chia-Jung Li, Shi-Qing Huang, Wan-Hsiang Lien,  
Chih-Hsin Chen, Chung-Hung Hsieh, Bo-Cheng Wang, Siu-Fung Cheung, Po-Shen  
Pan\*

Department of Chemistry, Tamkang University

# Content

|                               |     |
|-------------------------------|-----|
| 1. (1a) .....                 | S1  |
| 2. (1b).....                  | S3  |
| 3. (1c).....                  | S5  |
| 4. (1d).....                  | S7  |
| 5. (1e) .....                 | S10 |
| 6. (1f) .....                 | S13 |
| 7. (1g) .....                 | S16 |
| 8. (1h) .....                 | S18 |
| 9. (2a) .....                 | S20 |
| 10. (2b) .....                | S25 |
| 11. (2c) .....                | S28 |
| 12. (2d) .....                | S31 |
| 13. (2e) .....                | S34 |
| 14. (2f) .....                | S37 |
| 15. (2g) .....                | S40 |
| 16. (2h) .....                | S43 |
| 17. (3) .....                 | S46 |
| 18. (4) .....                 | S48 |
| 19. (5) .....                 | S50 |
| 20. (6) .....                 | S54 |
| 21. Calculation methods ..... | S58 |

*N*-(4-(4,4,5,5-tetramethyl-1,3,2-dioxaborolan-2-yl)phenyl)formamide (**1a**)

<sup>1</sup>H-NMR (600 MHz, CDCl<sub>3</sub>)

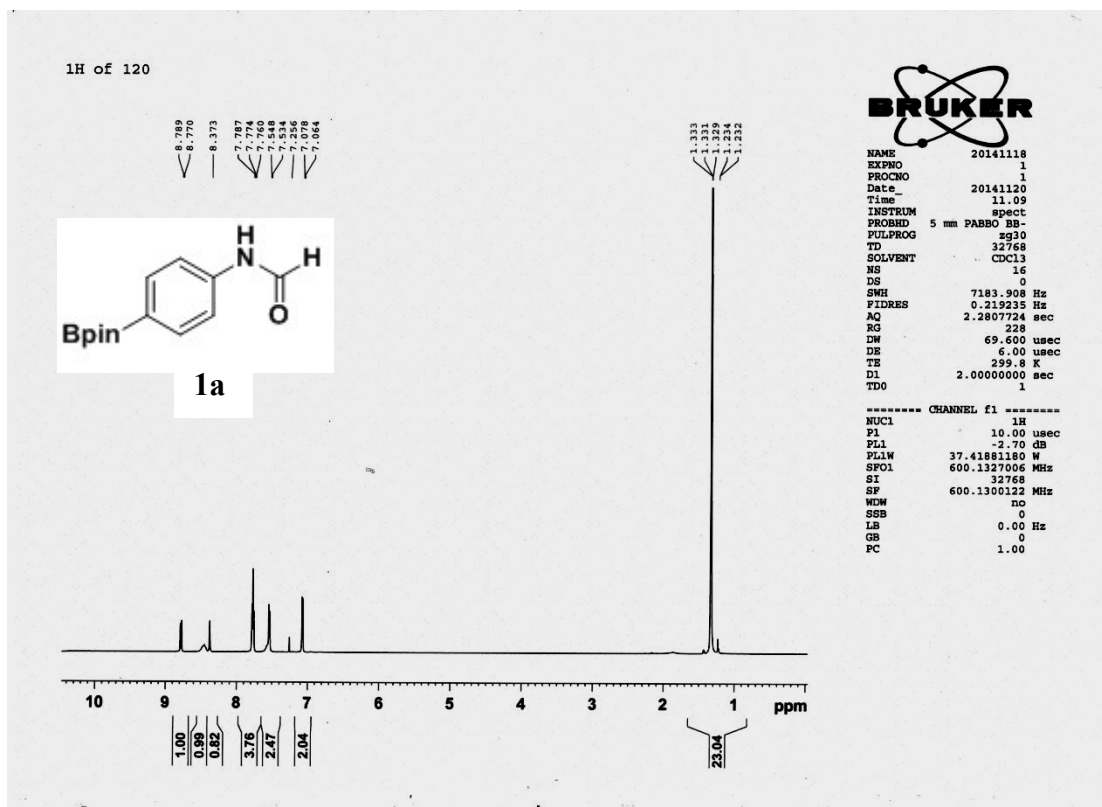

<sup>13</sup>C-NMR (150 MHz, CDCl<sub>3</sub>)

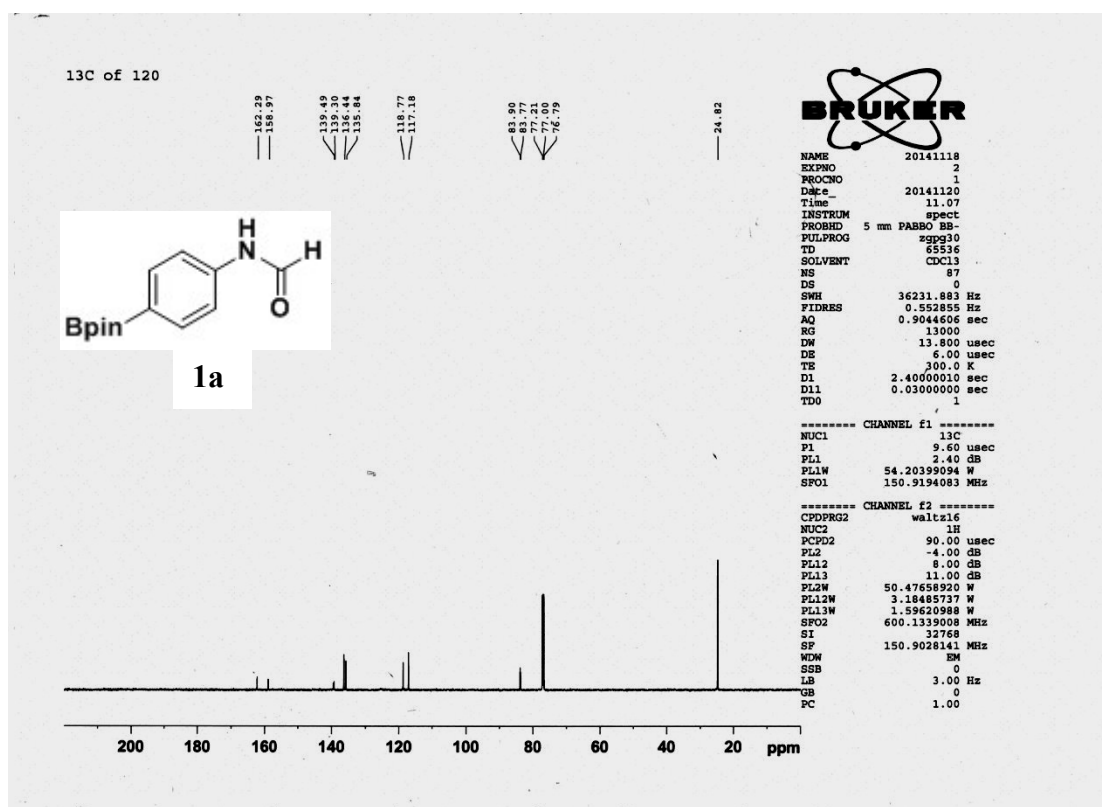

$^{11}\text{B}$ -NMR (193 MHz,  $\text{CDCl}_3$ )

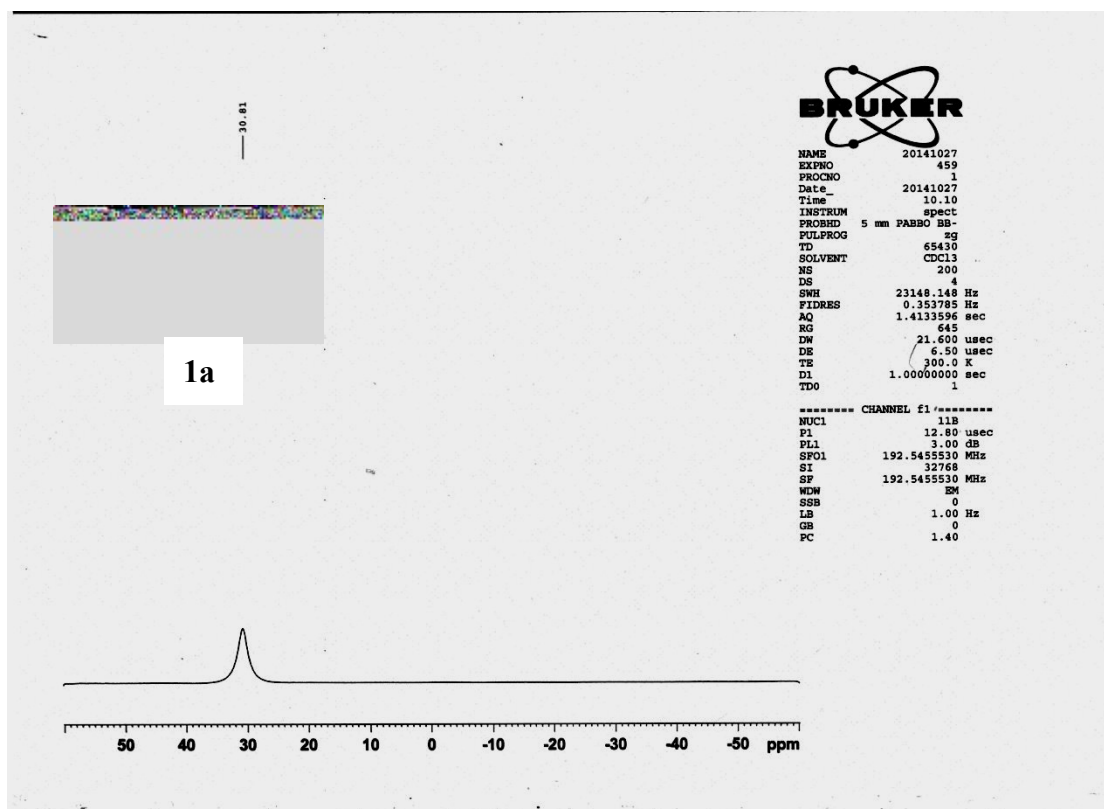

HRMS

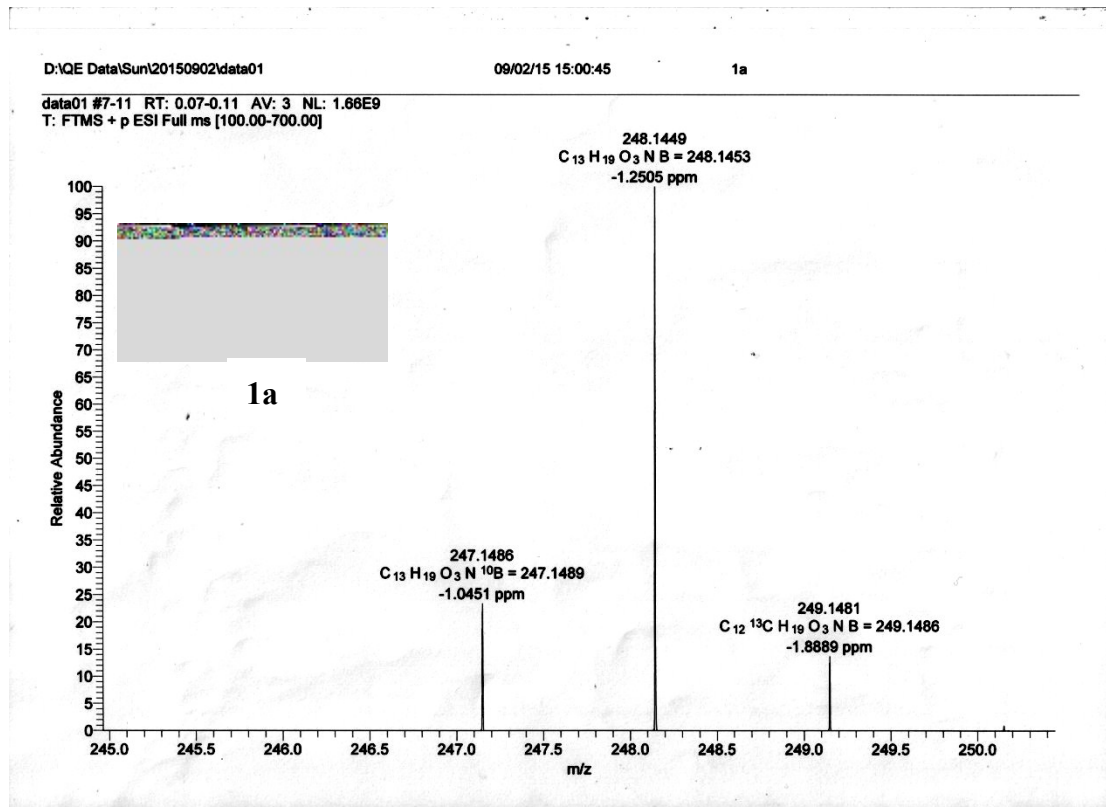

*N*-(4-(4,4,5,5-tetramethyl-1,3,2-dioxaborolan-2-yl)benzyl)formamide (**1b**)

<sup>1</sup>H-NMR (300 MHz, CDCl<sub>3</sub>)

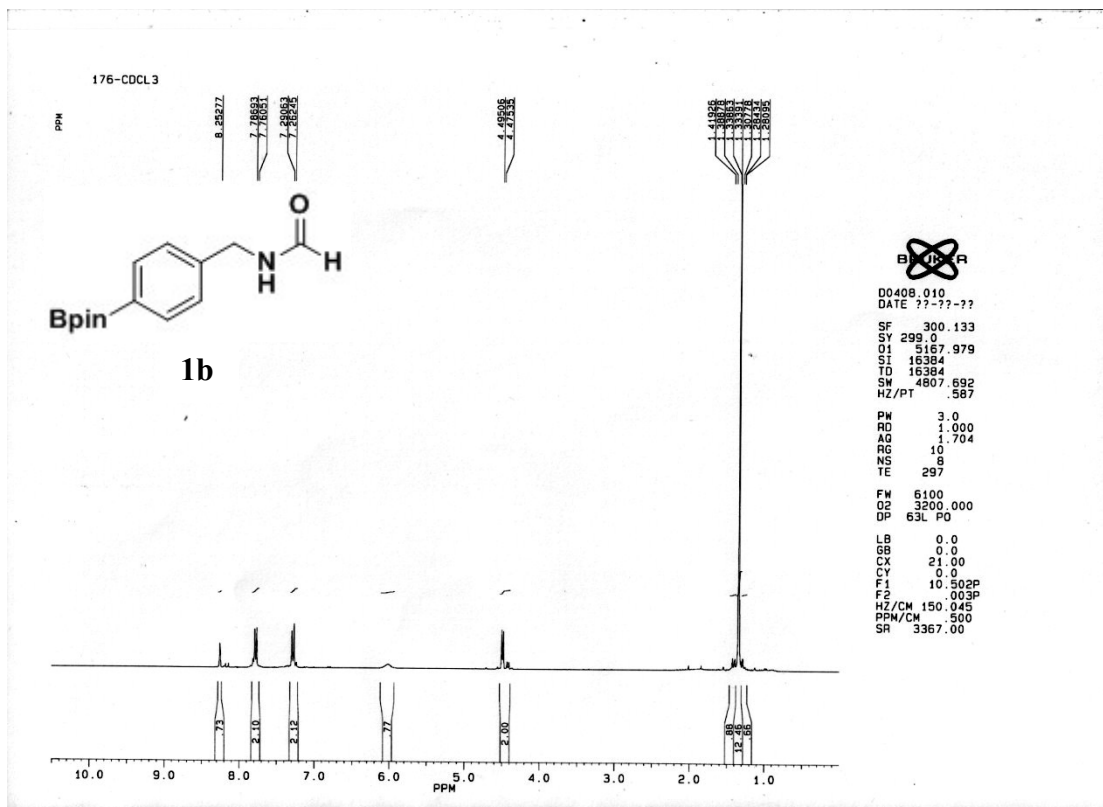

<sup>13</sup>C-NMR (150 MHz, CDCl<sub>3</sub>)

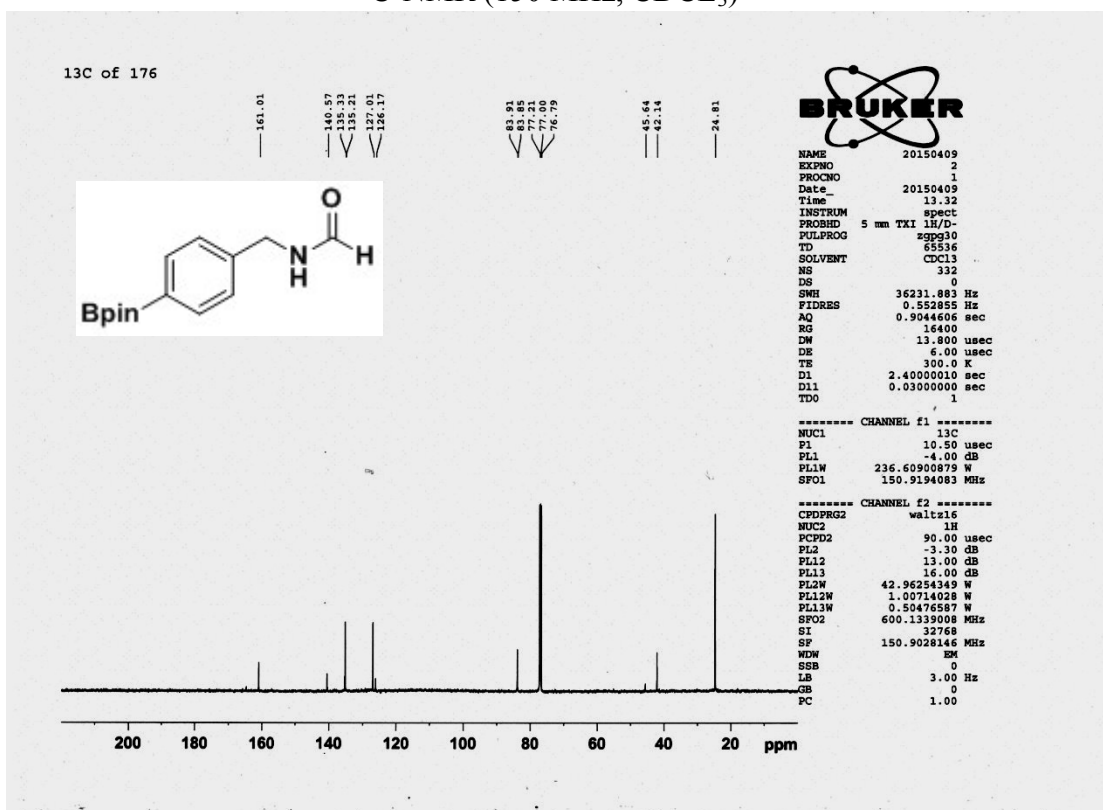

$^{11}\text{B}$ -NMR (193 MHz,  $\text{CDCl}_3$ )

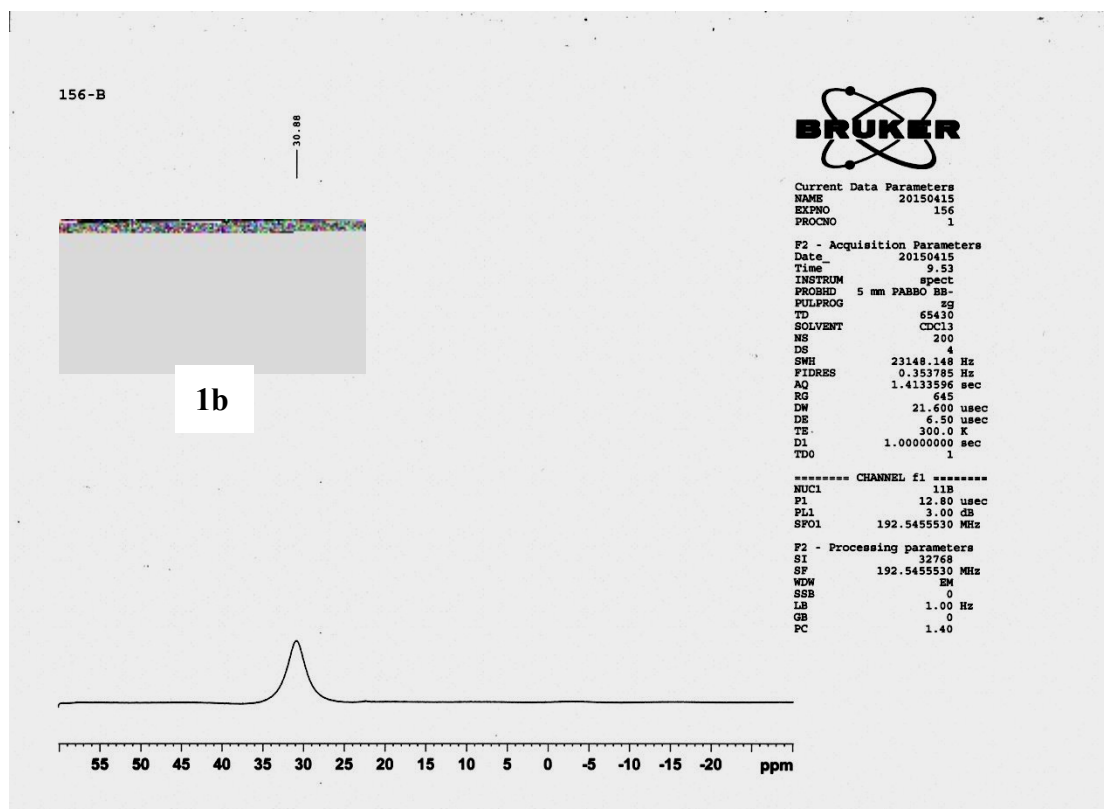

HRMS

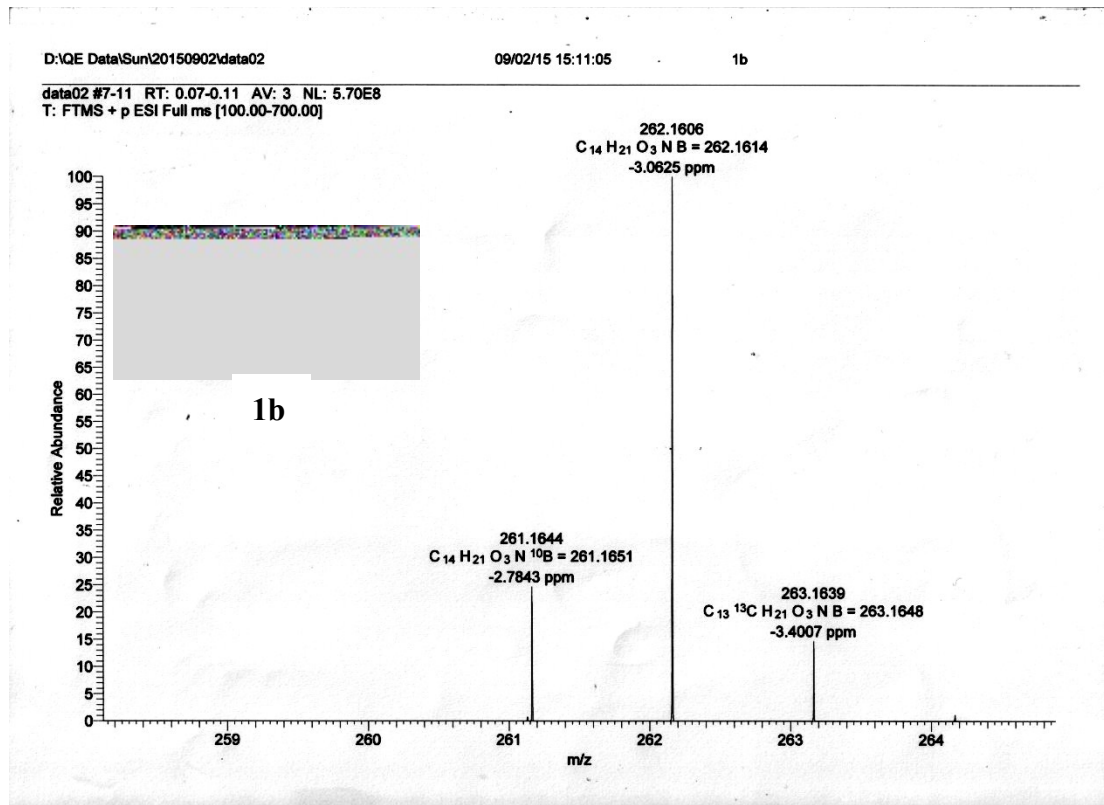

*N*-(3-(4,4,5,5-tetramethyl-1,3,2-dioxaborolan-2-yl)benzyl)formamide (**1c**)

<sup>1</sup>H-NMR (600 MHz, CDCl<sub>3</sub>)

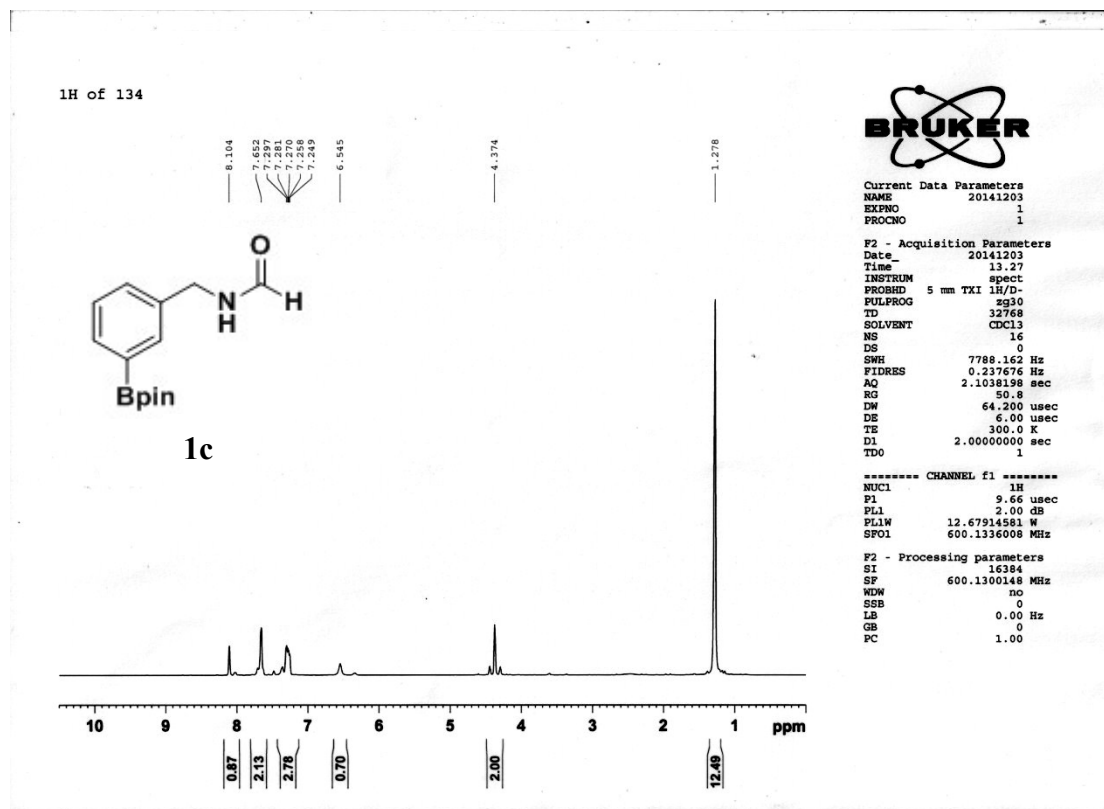

<sup>13</sup>C-NMR (150 MHz, CDCl<sub>3</sub>)

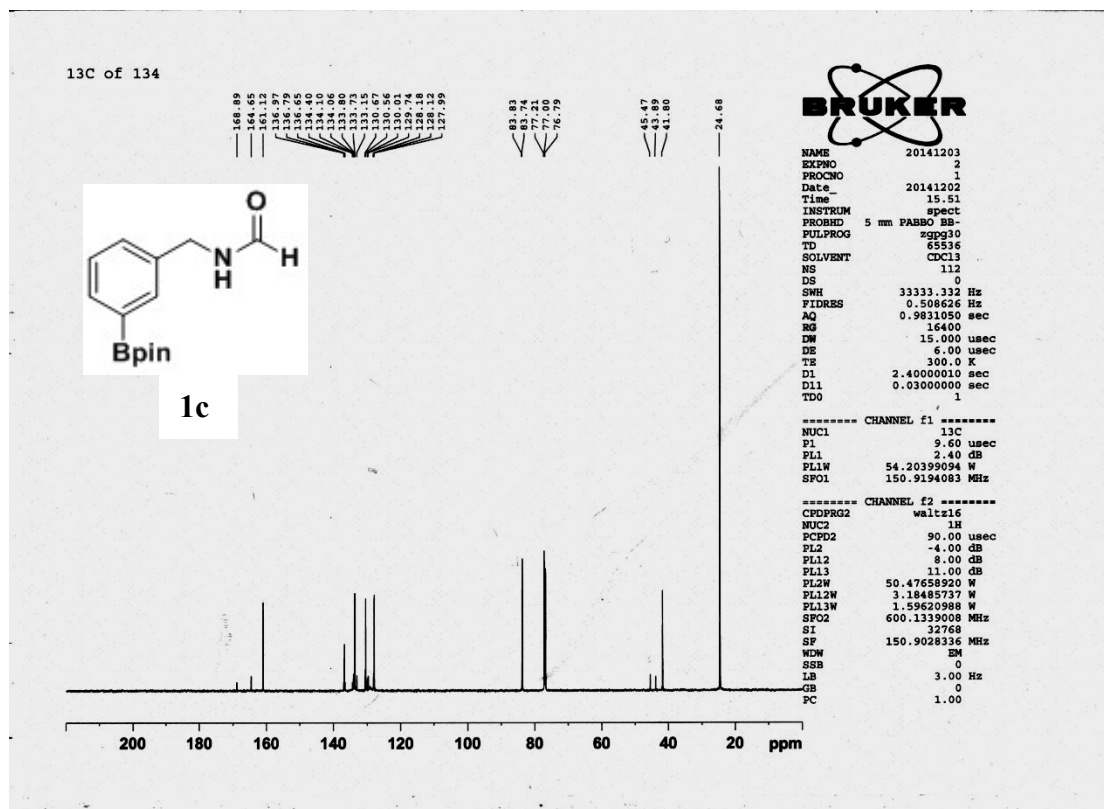

$^{11}\text{B}$ -NMR (193 MHz,  $\text{CDCl}_3$ )

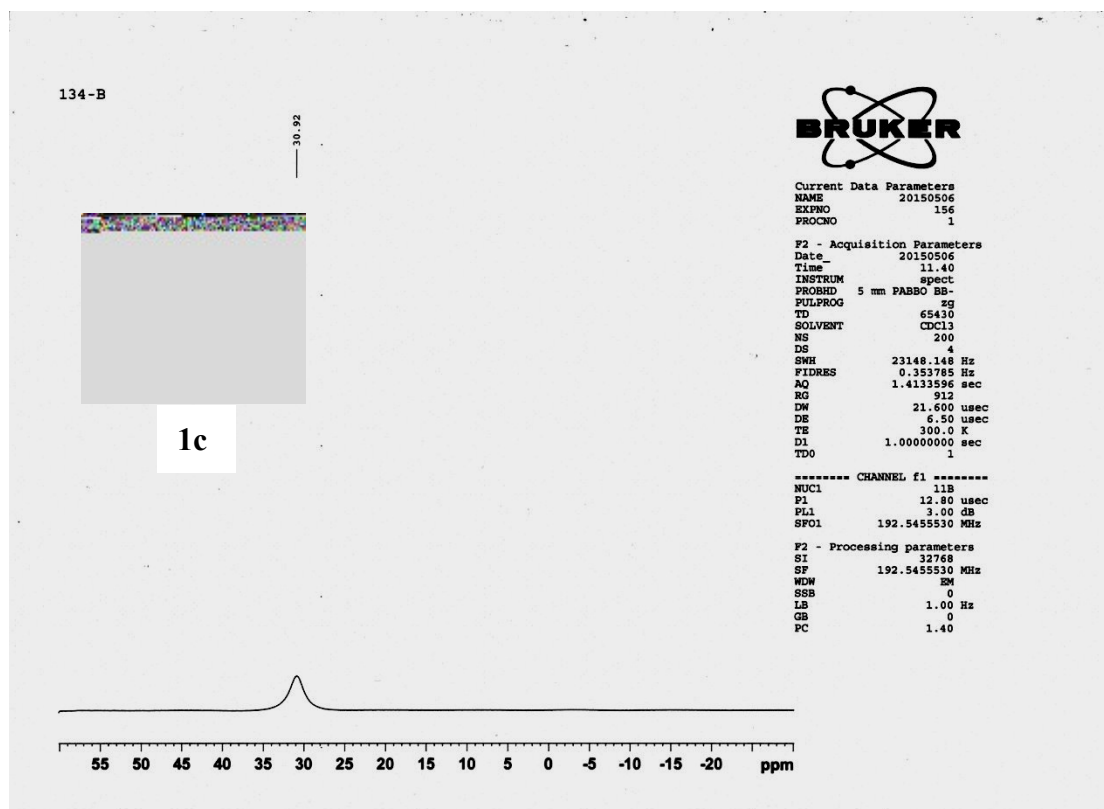

HRMS

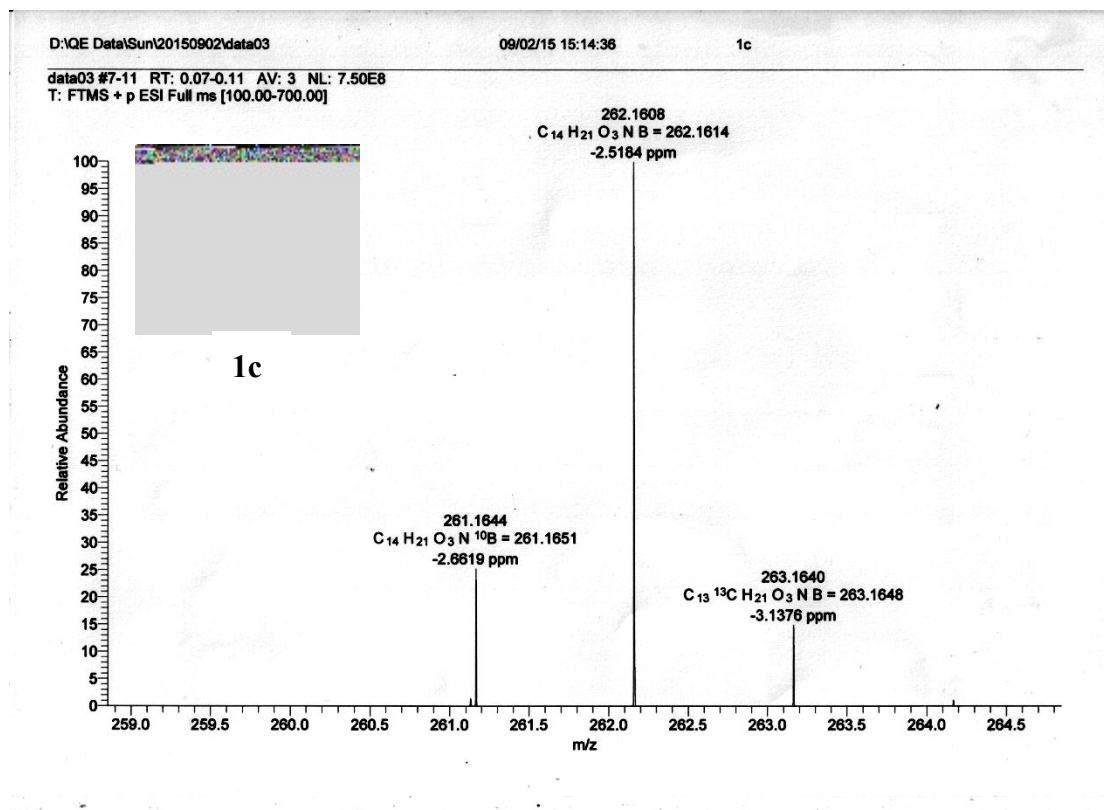



*N*-(2-fluoro-5-(4,4,5,5-tetramethyl-1,3,2-dioxaborolan-2-yl)benzyl)formamide (**1d**)

<sup>1</sup>H-NMR (300 MHz, CDCl<sub>3</sub>)

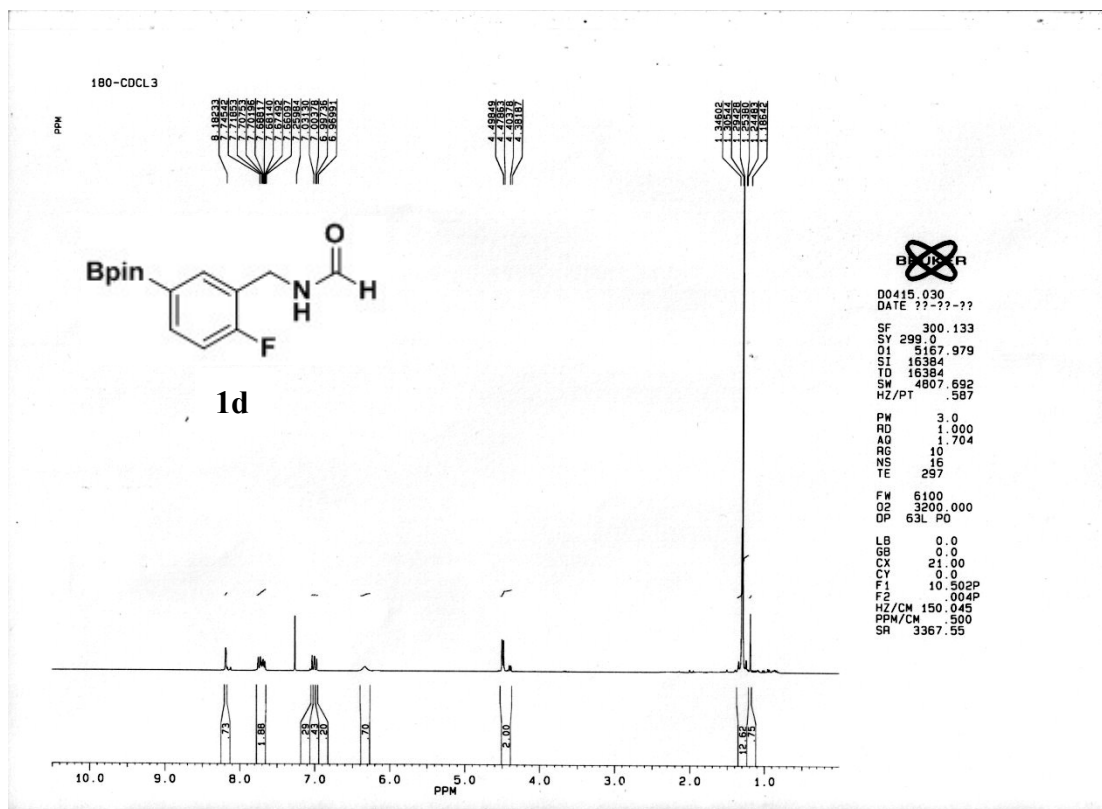

<sup>13</sup>C-NMR (150 MHz, CDCl<sub>3</sub>)

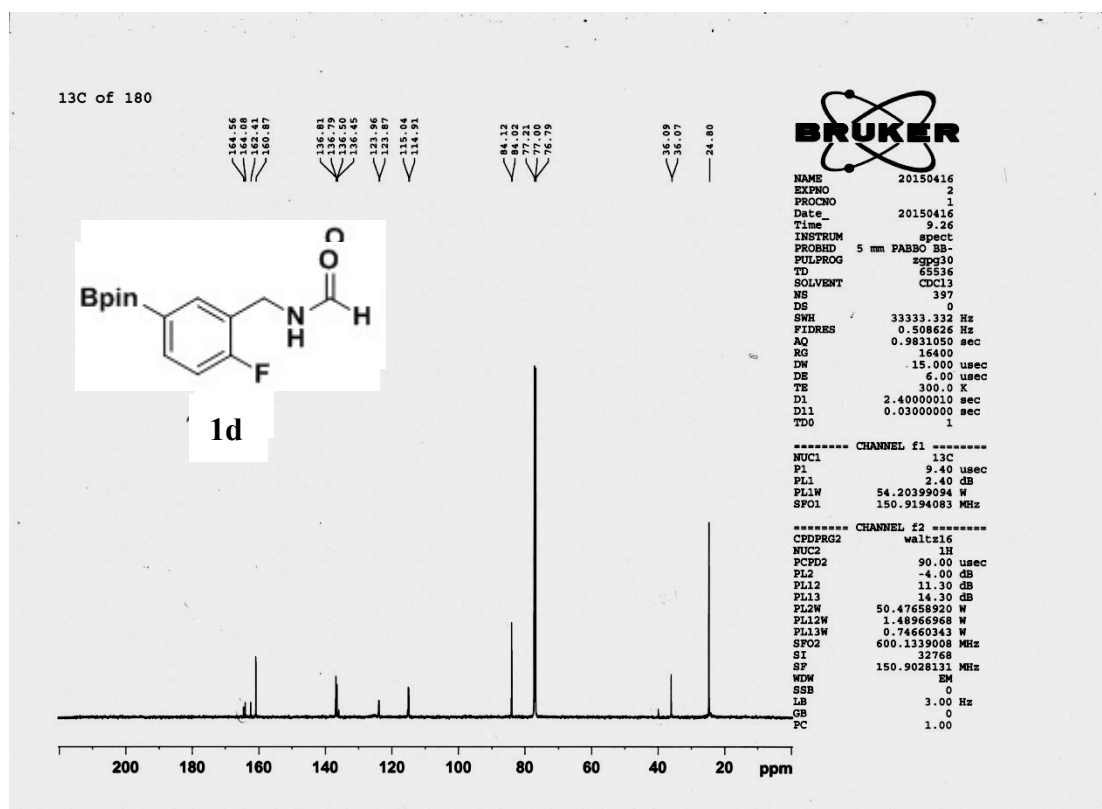

<sup>11</sup>B-NMR (193 MHz, CDCl<sub>3</sub>)

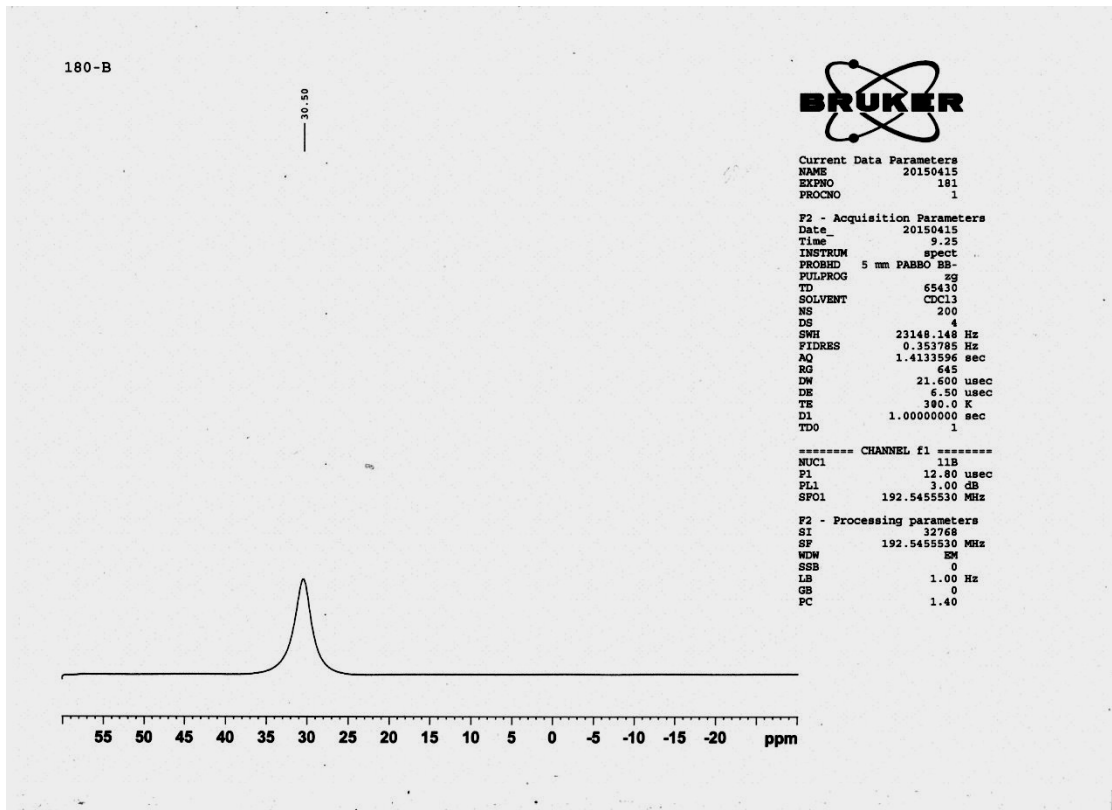

<sup>19</sup>F-NMR

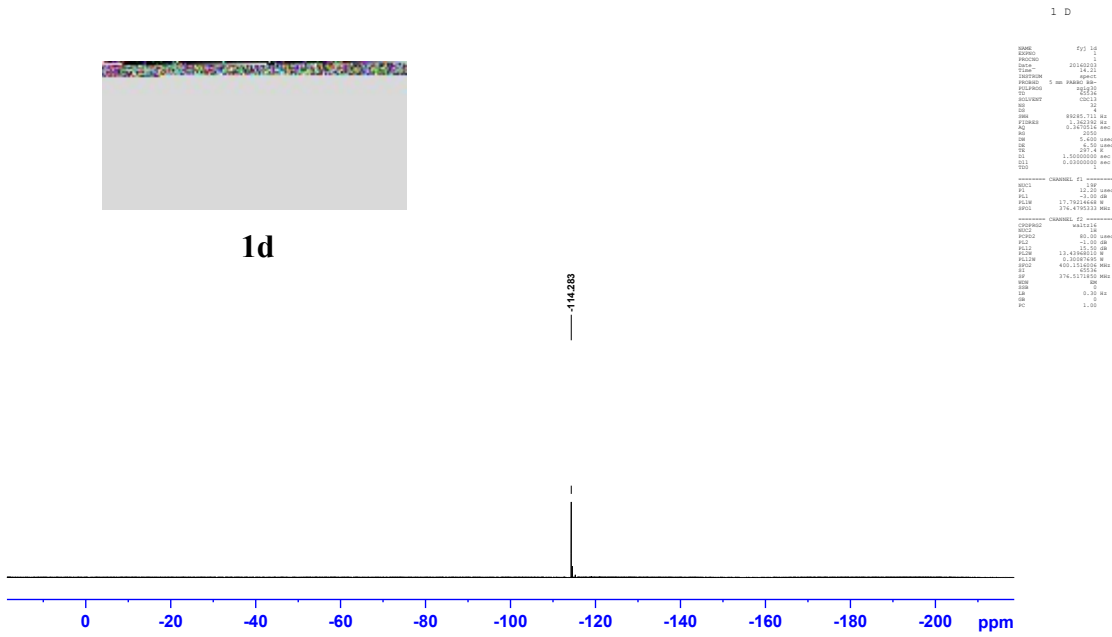

HRMS

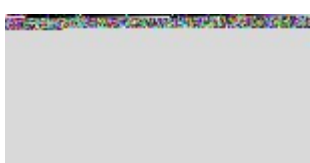

data04 #7-11 RT: 0.07-0.11 AV: 3 NL: 1.38E9  
T: FTMS + p ESI Full ms [100.00-700.00]

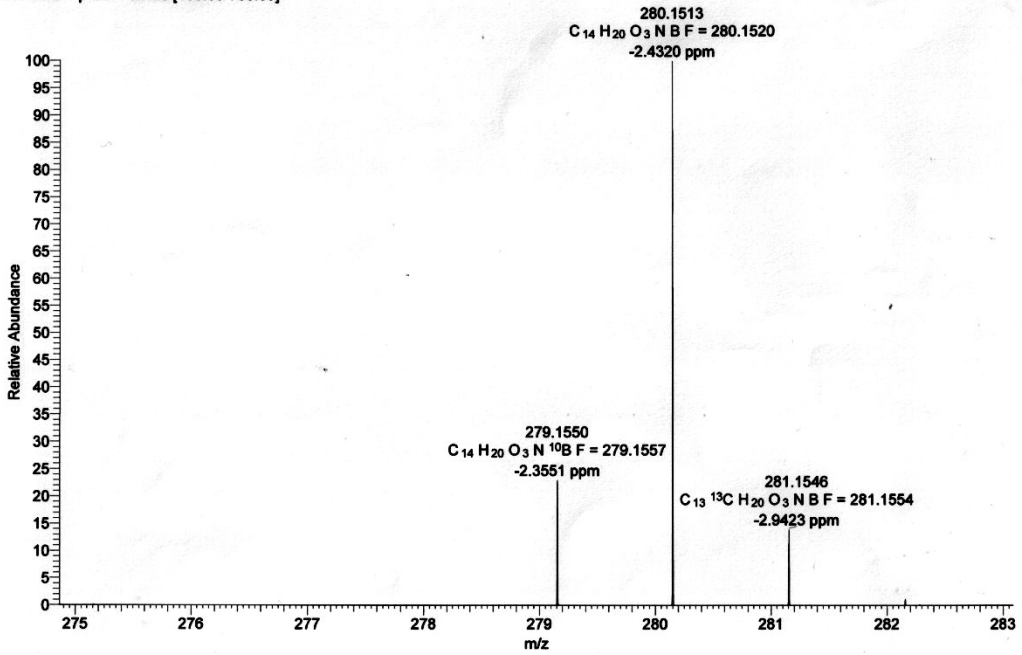

*N*-(4-fluoro-3-(4,4,5,5-tetramethyl-1,3,2-dioxaborolan-2-yl)benzyl)formamide (**1e**)

<sup>1</sup>H-NMR (300 MHz, CDCl<sub>3</sub>)

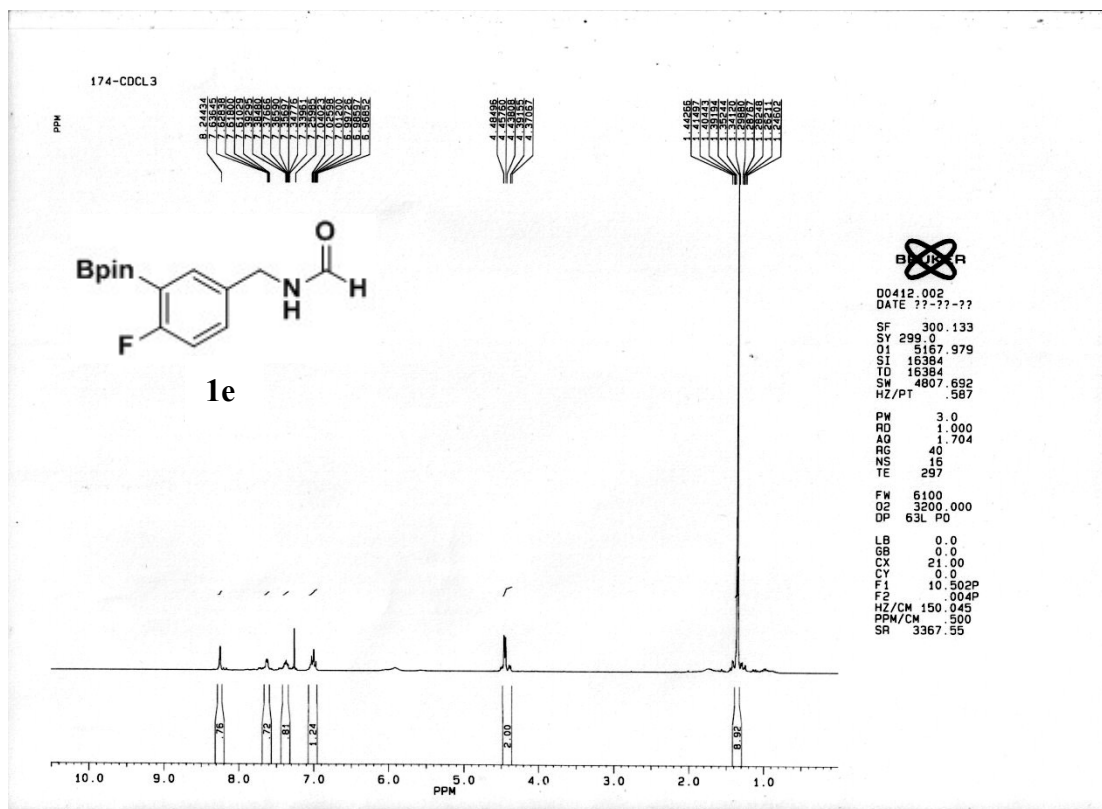

<sup>13</sup>C-NMR (150 MHz, CDCl<sub>3</sub>)

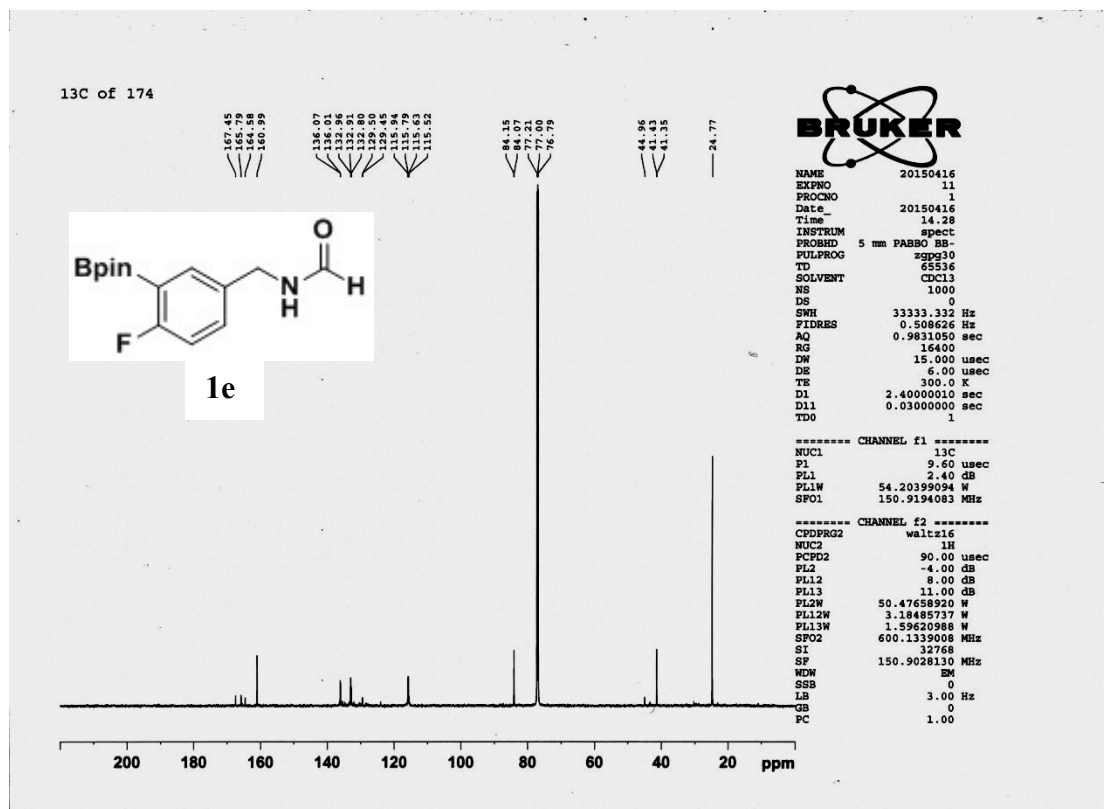

$^{11}\text{B}$ -NMR (193 MHz,  $\text{CDCl}_3$ )

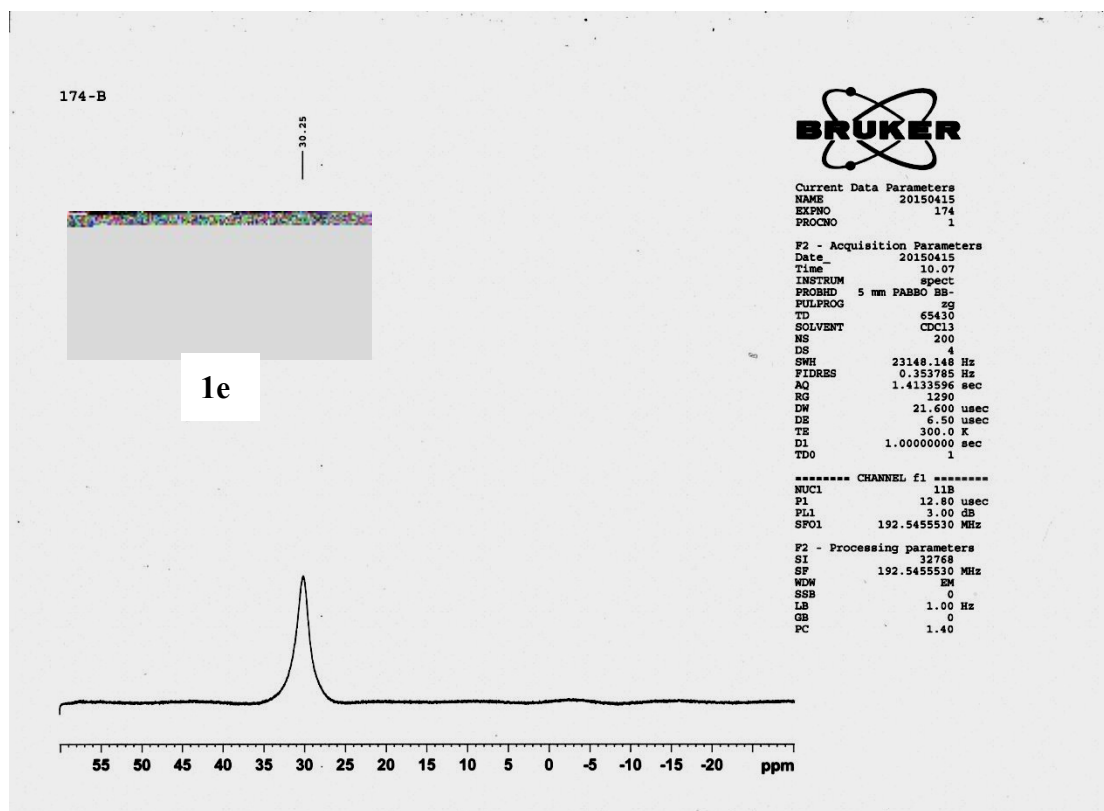

$^{19}\text{F}$ -NMR

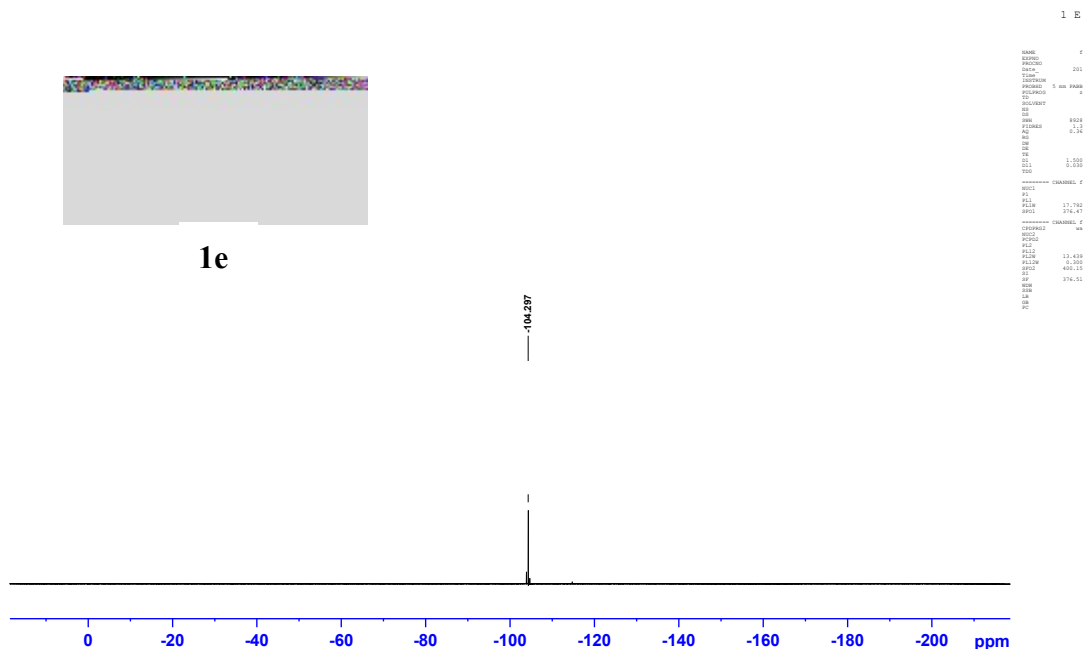

# HRMS

D:\QE Data\Sun\20150902\data05

09/02/15 15:21:30

1e

data05 #7-11 RT: 0.07-0.11 AV: 3 NL: 1.88E8  
T: FTMS + p ESI Full ms [100.00-700.00]

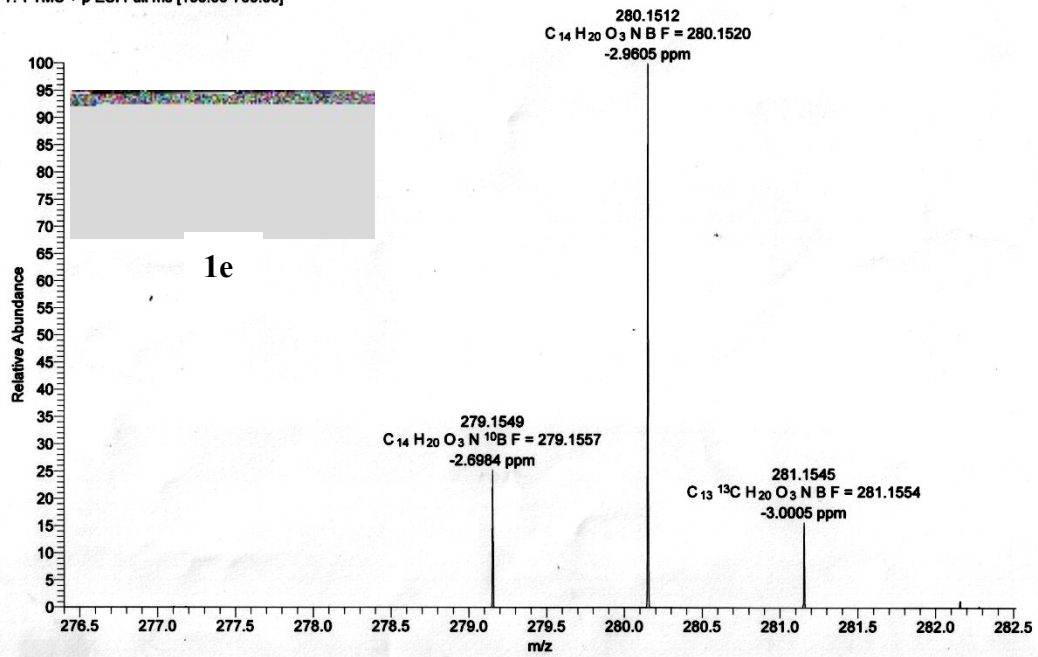

*N*-(3-fluoro-4-(4,4,5,5-tetramethyl-1,3,2-dioxaborolan-2-yl)benzyl)formamide (**1f**)

<sup>1</sup>H-NMR (600 MHz, CDCl<sub>3</sub>)

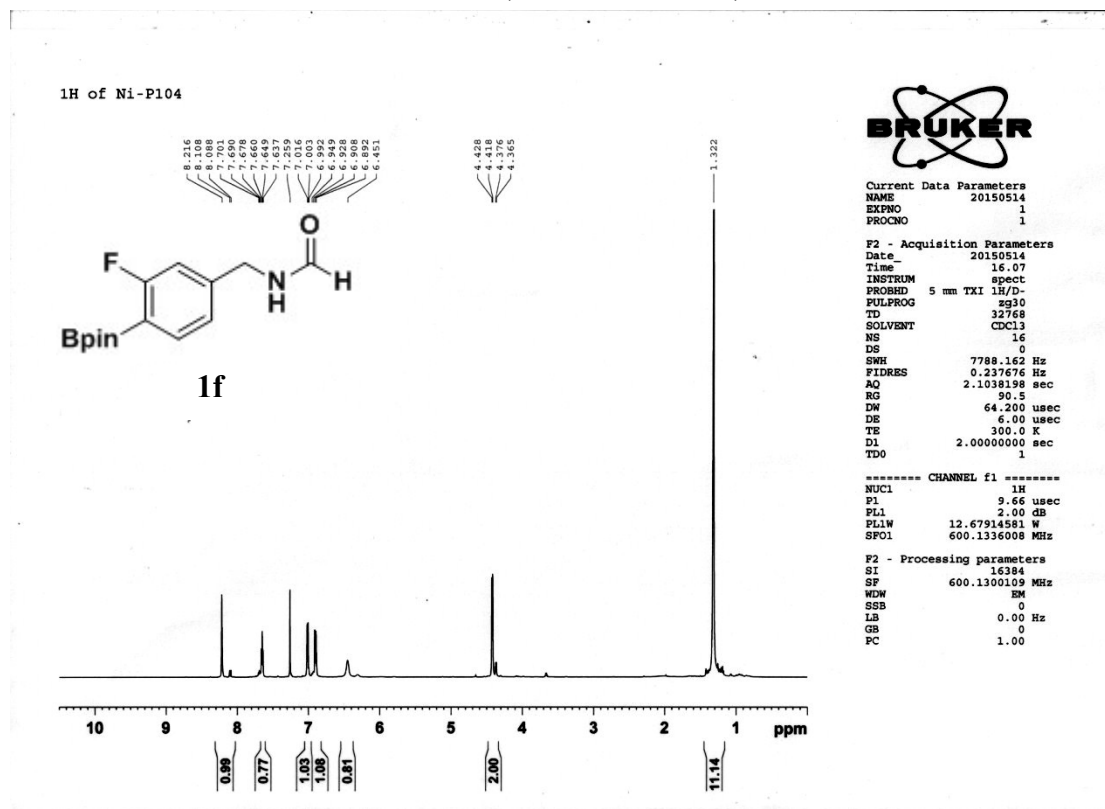

<sup>13</sup>C-NMR (150 MHz, CDCl<sub>3</sub>)

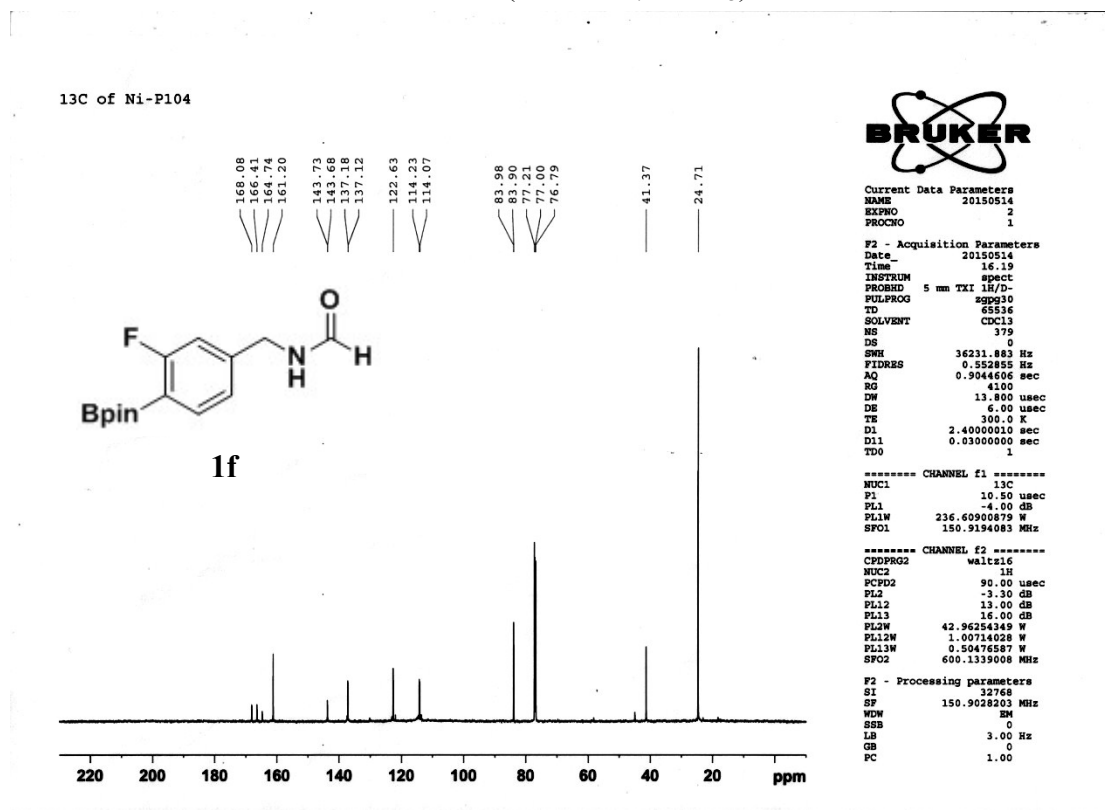

<sup>11</sup>B-NMR (193 MHz, CDCl<sub>3</sub>)

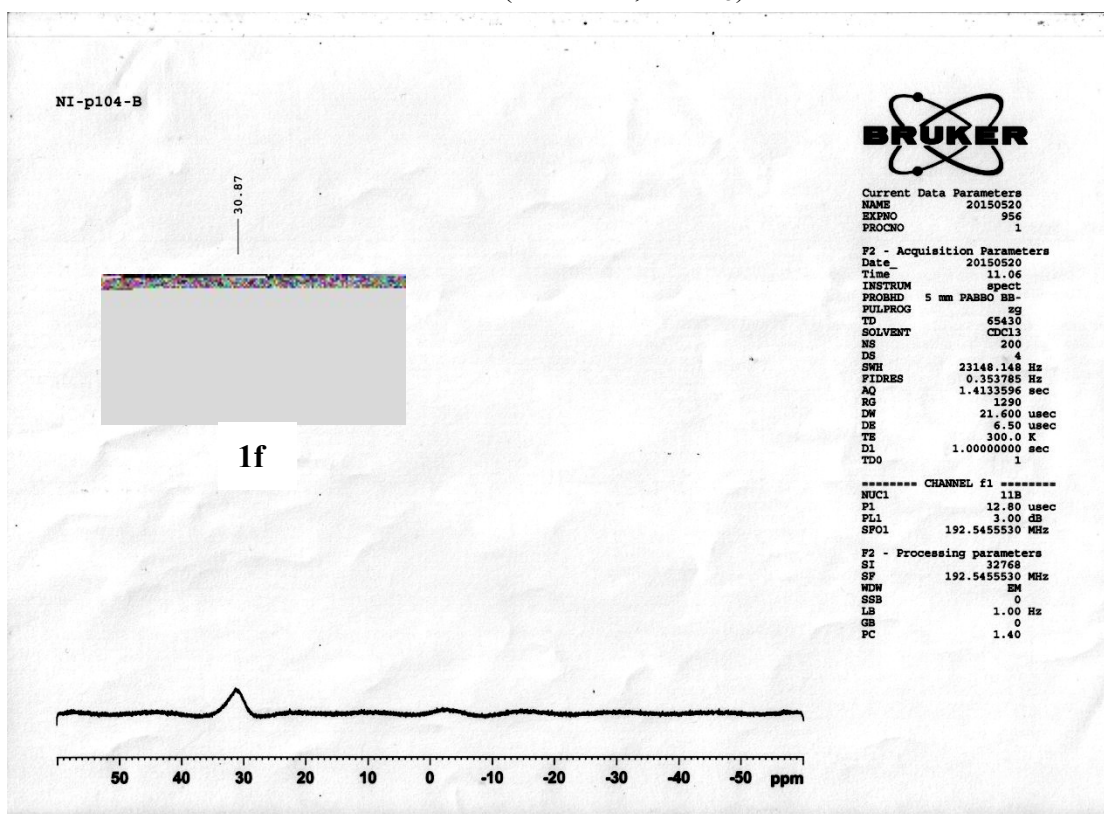

<sup>19</sup>F-NMR

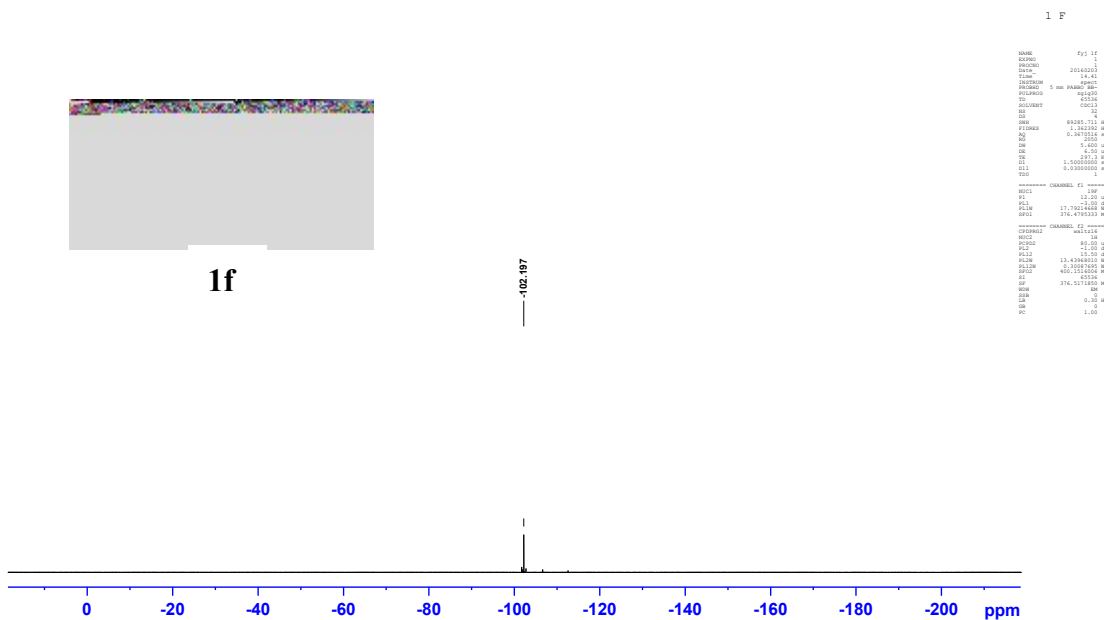



# HRMS

D:\QE Data\Sun\20150902\data06

09/02/15 15:32:21

1f

data06 #7-11 RT: 0.07-0.11 AV: 3 NL: 4.26E8  
T: FTMS + p ESI Full ms [100.00-700.00]

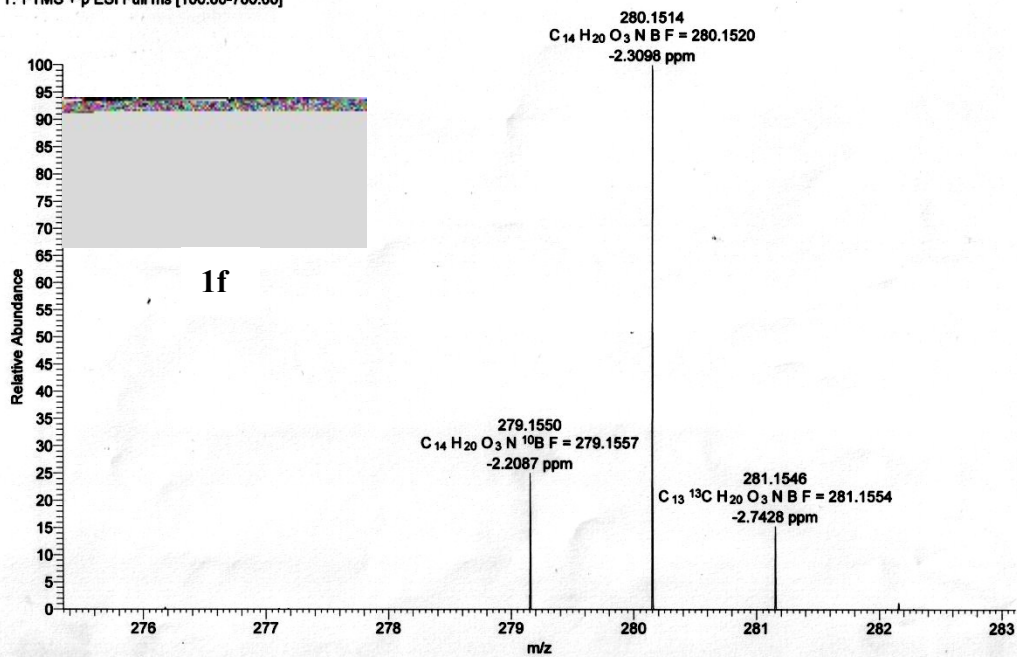

*N*-(4-chloro-3-(4,4,5,5-tetramethyl-1,3,2-dioxaborolan-2-yl)benzyl)formamide (**1g**)

<sup>1</sup>H-NMR (300 MHz, CDCl<sub>3</sub>)

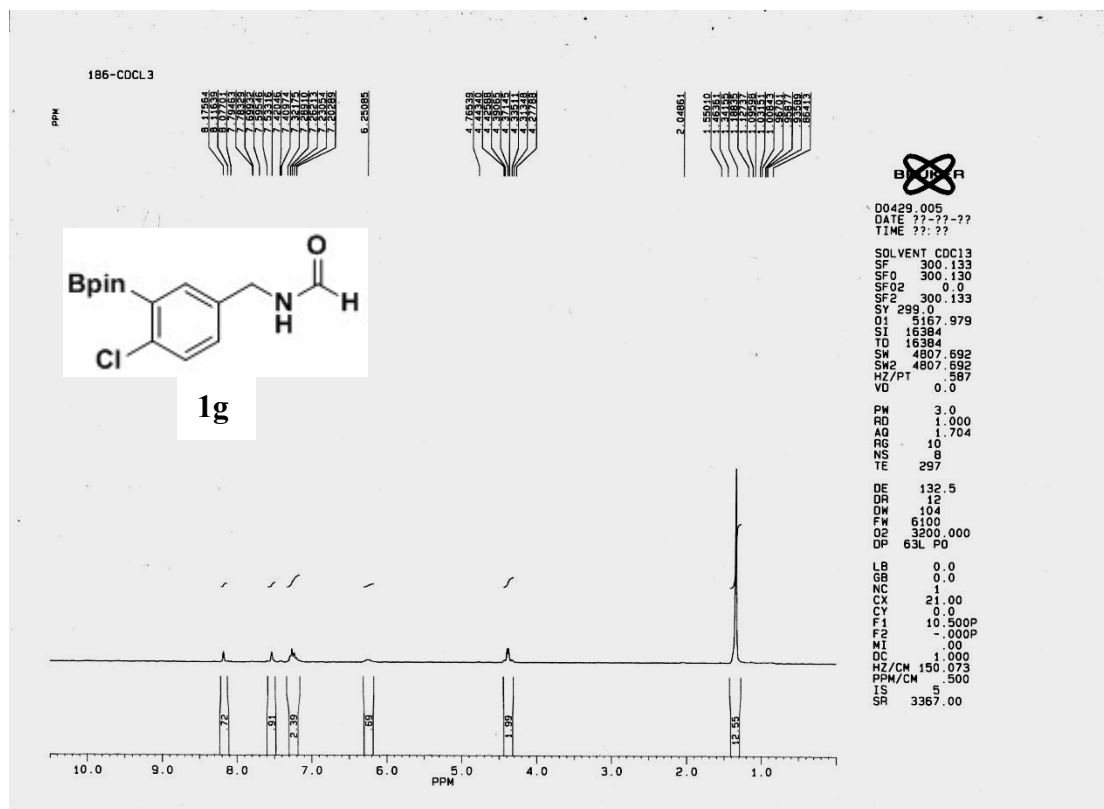

<sup>13</sup>C-NMR (150 MHz, CDCl<sub>3</sub>)

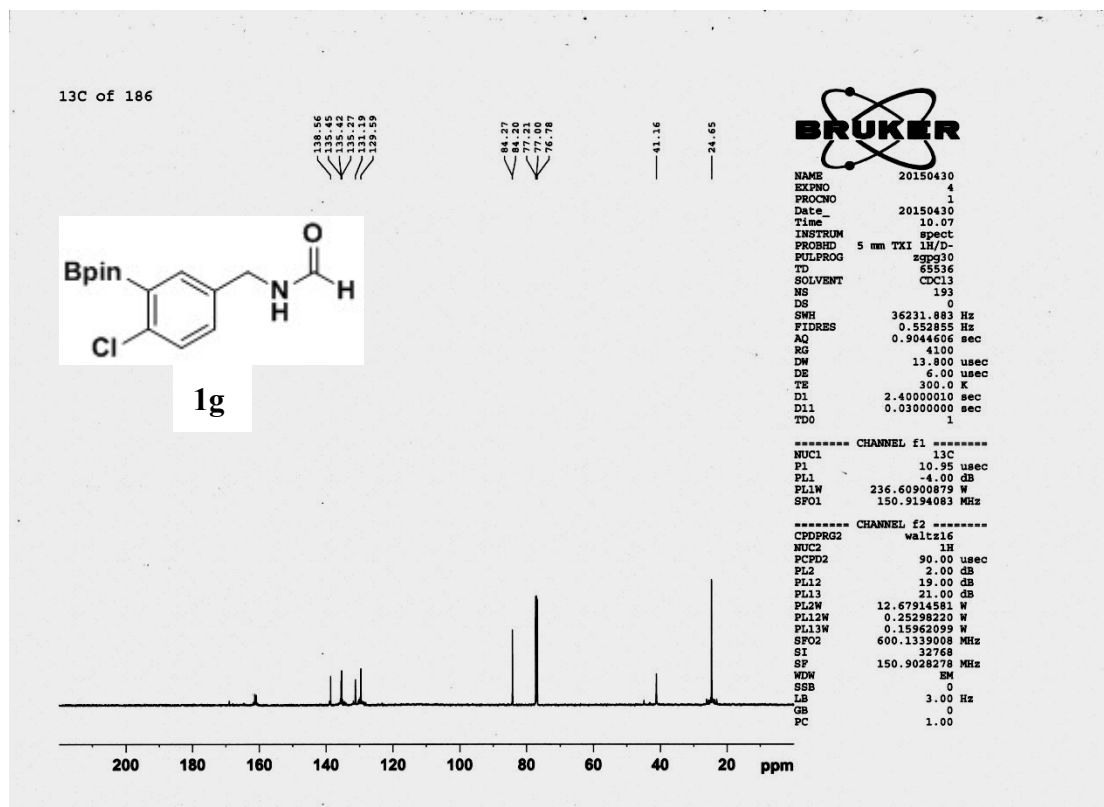

$^{11}\text{B}$ -NMR (193 MHz,  $\text{CDCl}_3$ )

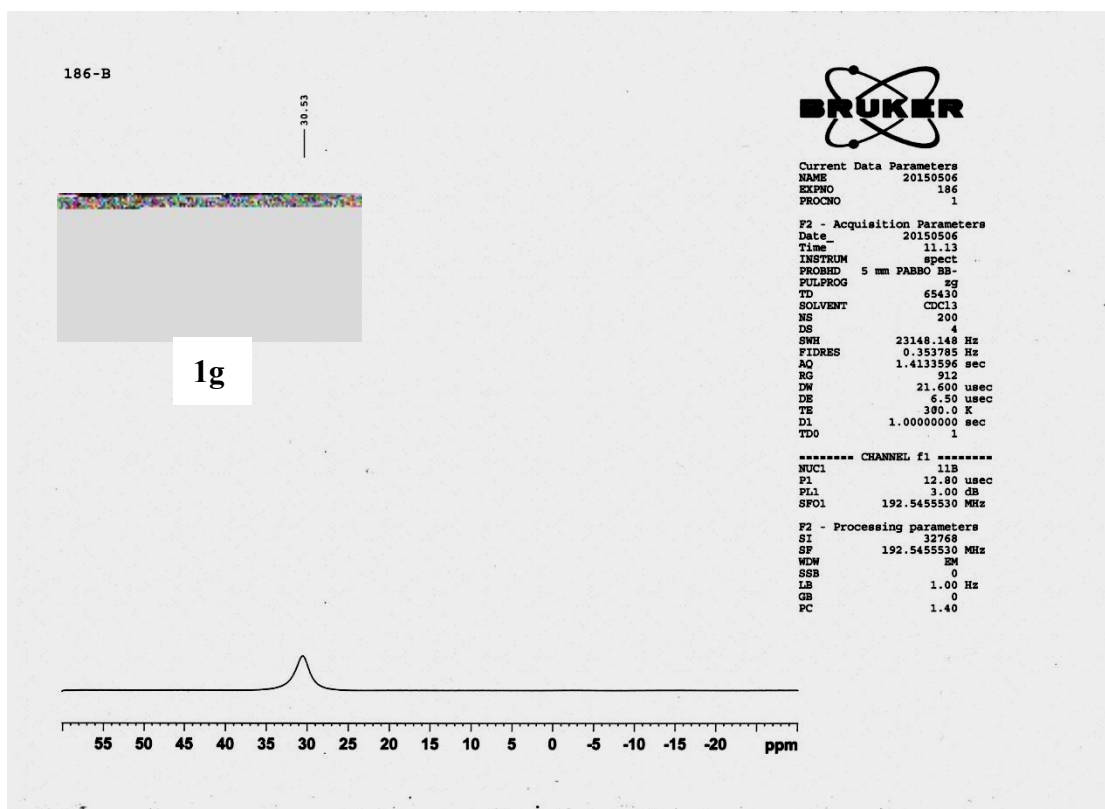

*N*-(2-methyl-5-(4,4,5,5-tetramethyl-1,3,2-dioxaborolan-2-yl)benzyl)formamide (**1h**)  
 $^1\text{H-NMR}$  (300 MHz,  $\text{CDCl}_3$ )

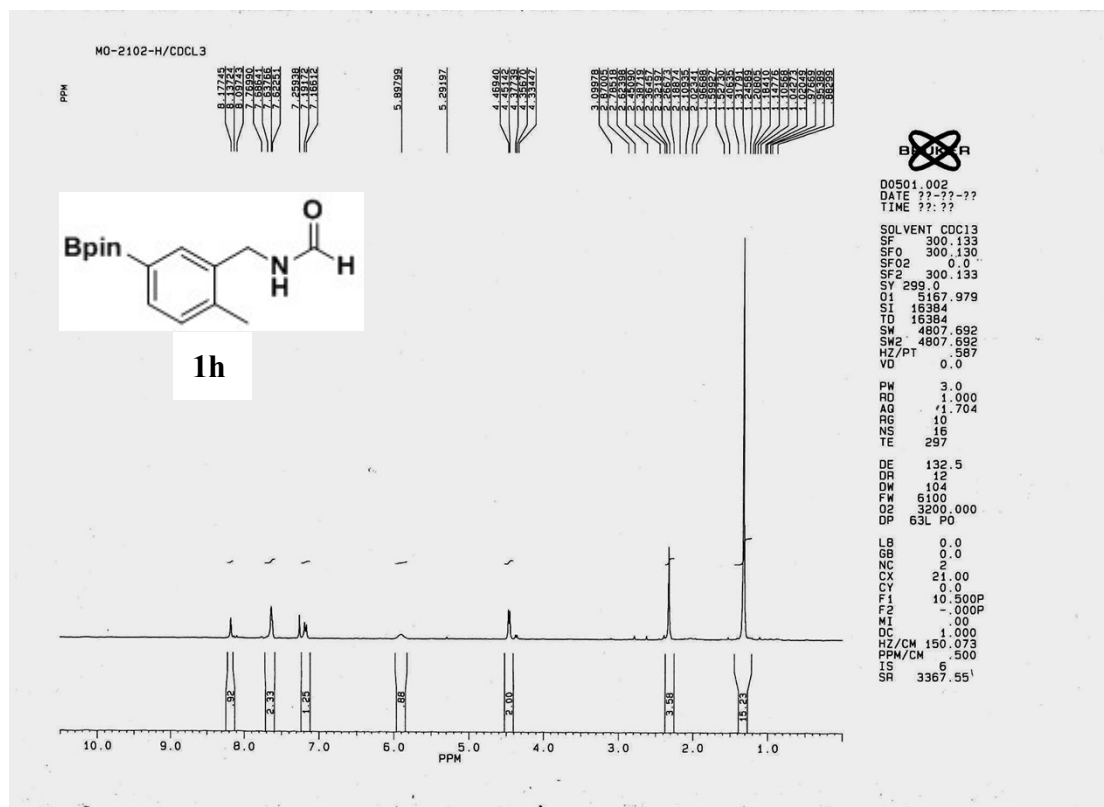

$^{13}\text{C-NMR}$  (150 MHz,  $\text{CDCl}_3$ )

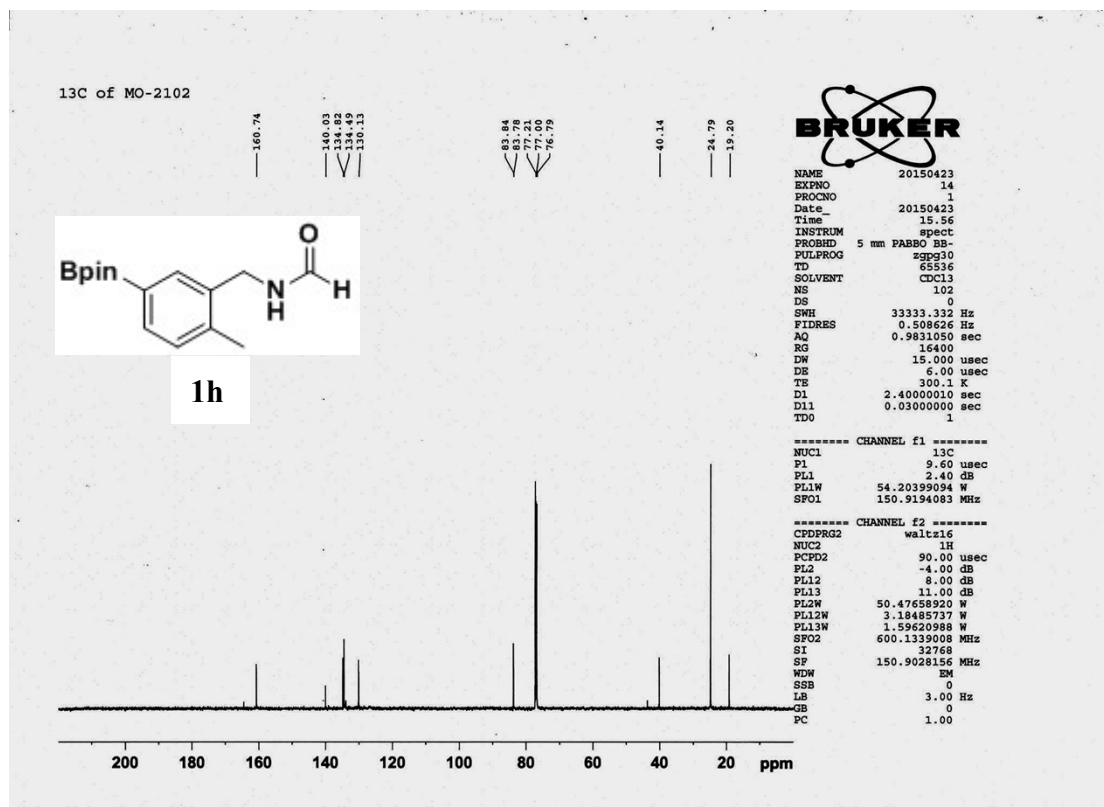

$^{11}\text{B}$ -NMR (193 MHz,  $\text{CDCl}_3$ )

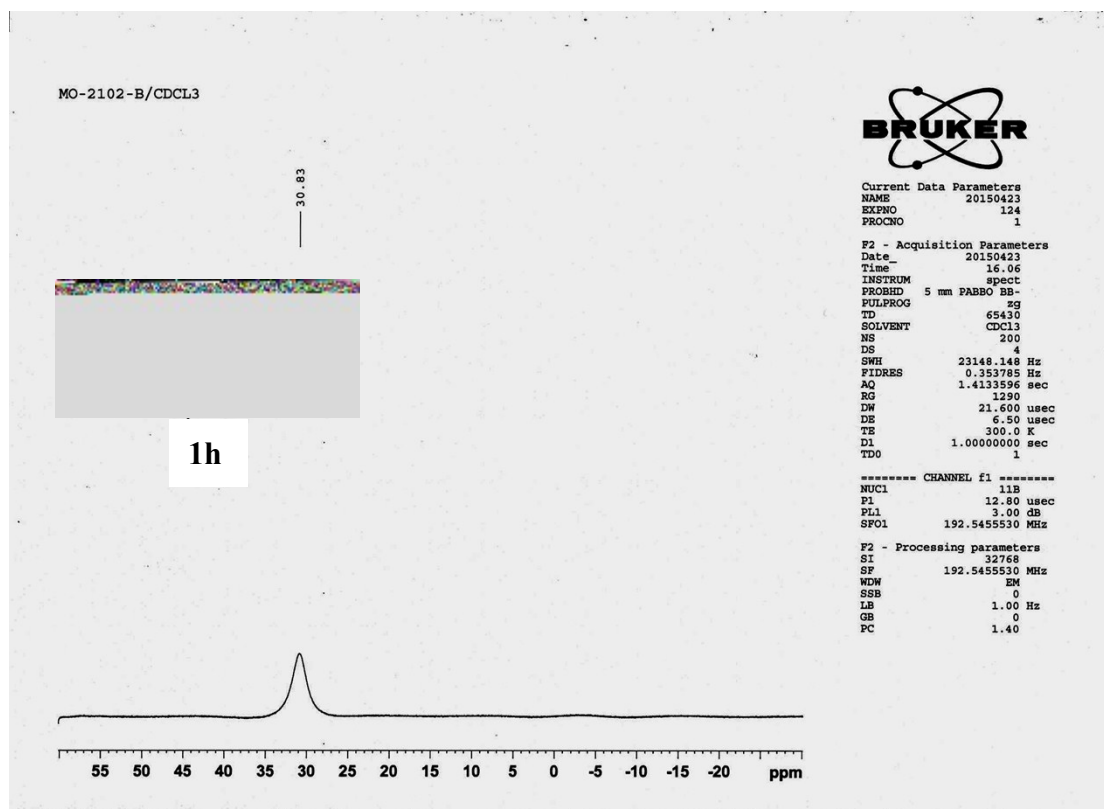

HRMS

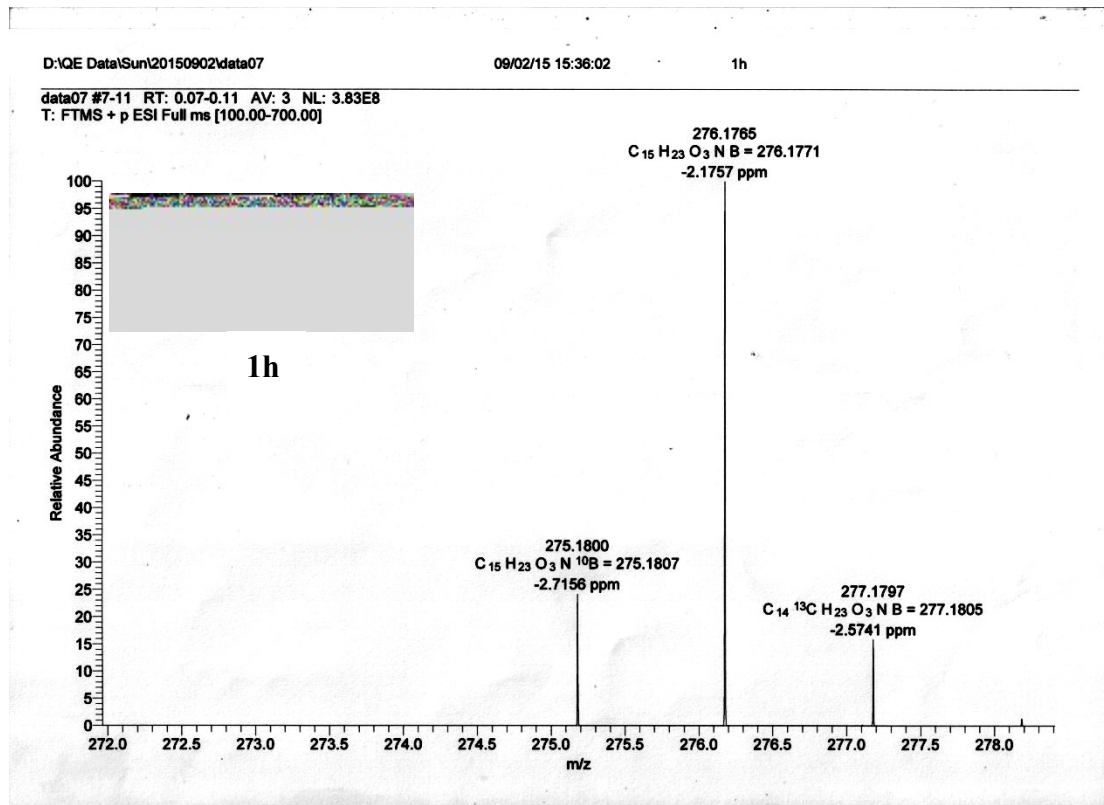

2-(4-isocyanophenyl)-4,4,5,5-tetramethyl-1,3,2-dioxaborolane (**2a**)

<sup>1</sup>H-NMR (600 MHz, CDCl<sub>3</sub>)

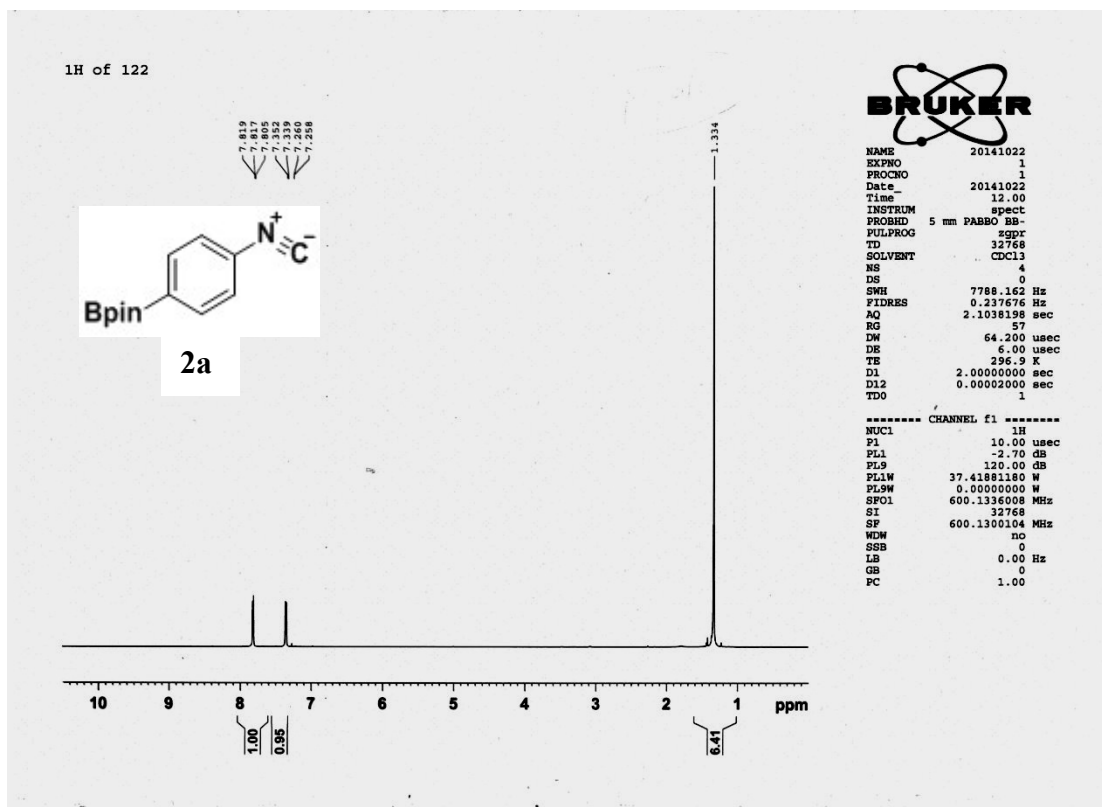

<sup>13</sup>C-NMR (150 MHz, CDCl<sub>3</sub>)

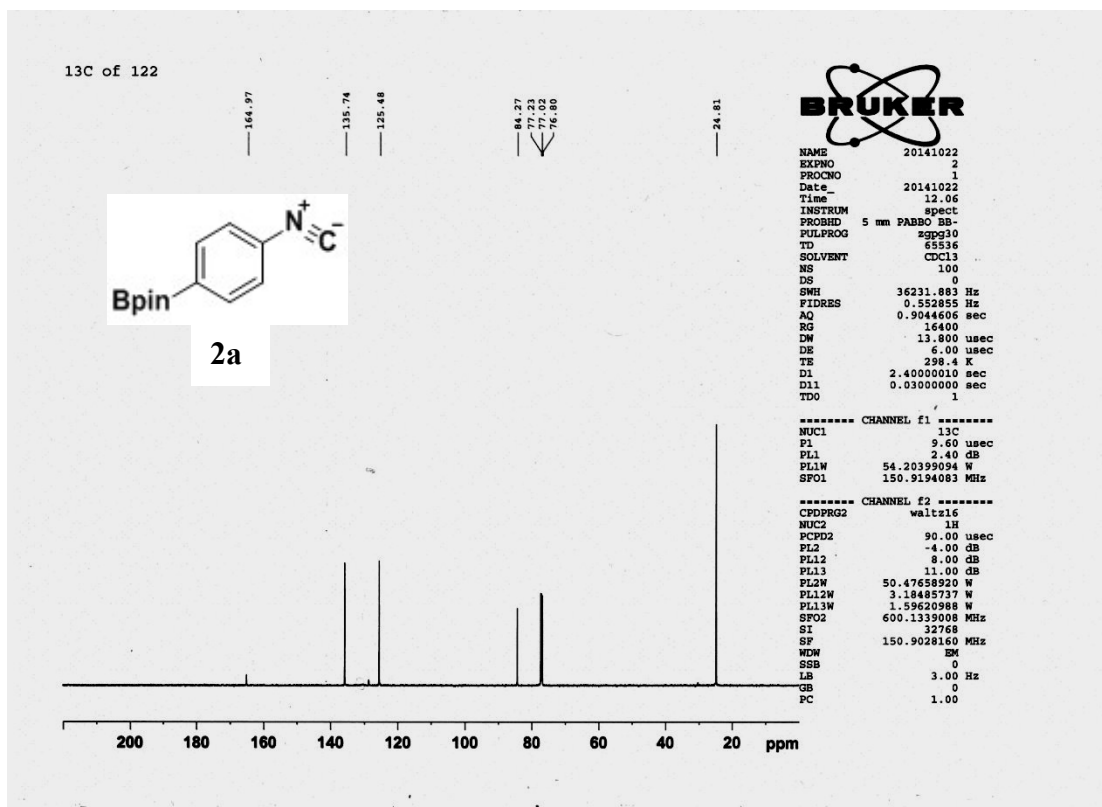

$^{11}\text{B}$ -NMR (193 MHz,  $\text{CDCl}_3$ )

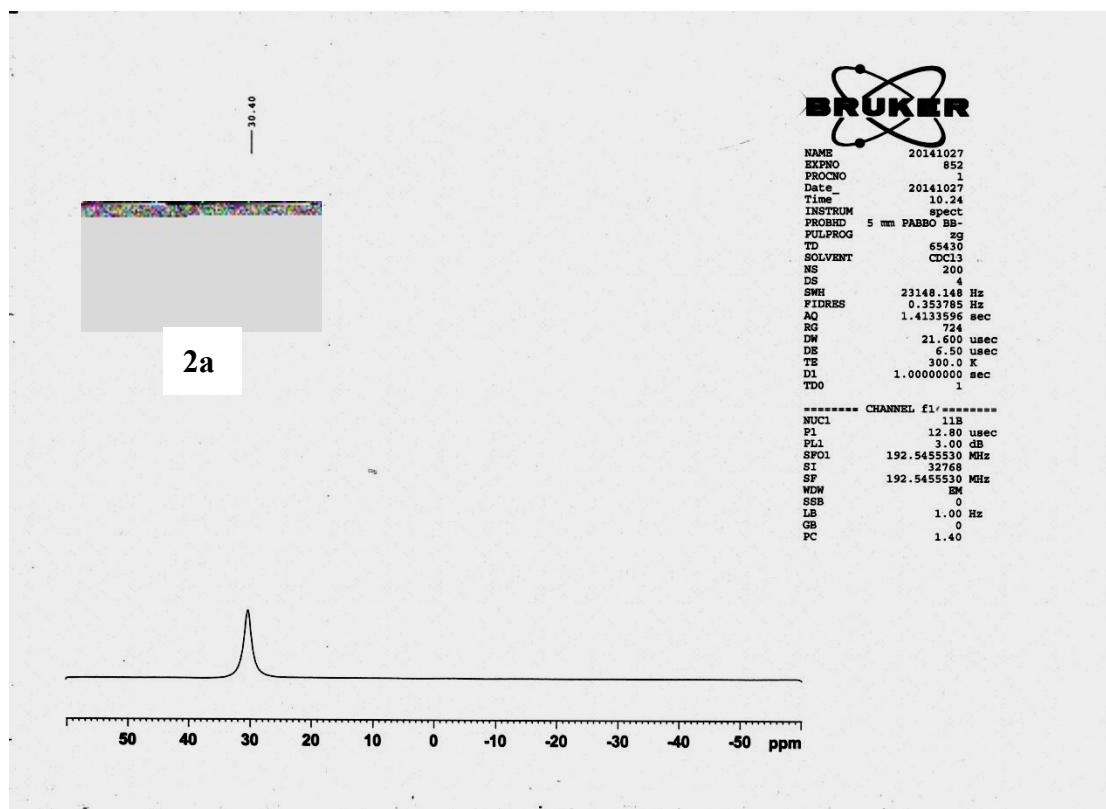

IR (KBr)

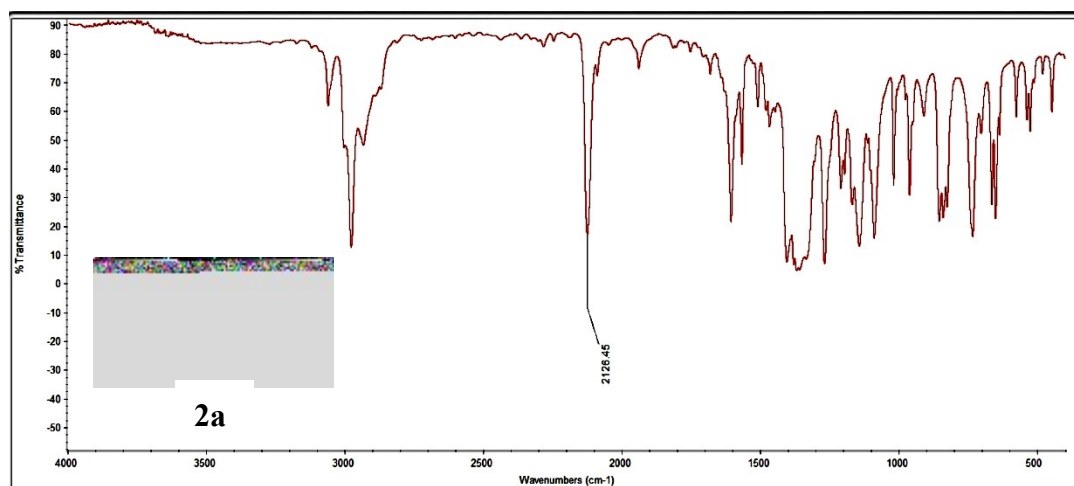

# HRMS

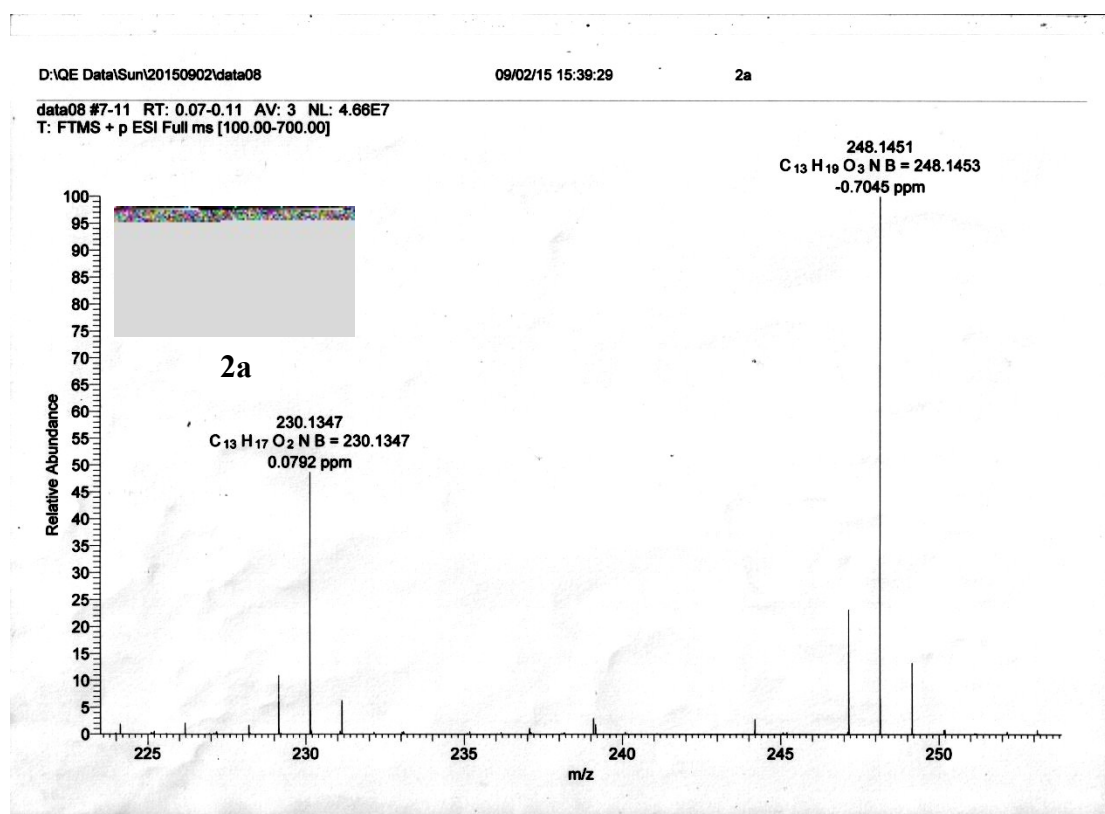

X-ray crystallographic analysis of 2-(4-isocyanophenyl)-4,4,5,5-tetramethyl-1,3,2-dioxaborolane (**2a**), thermal ellipsoids drawn at the 50% probability level.

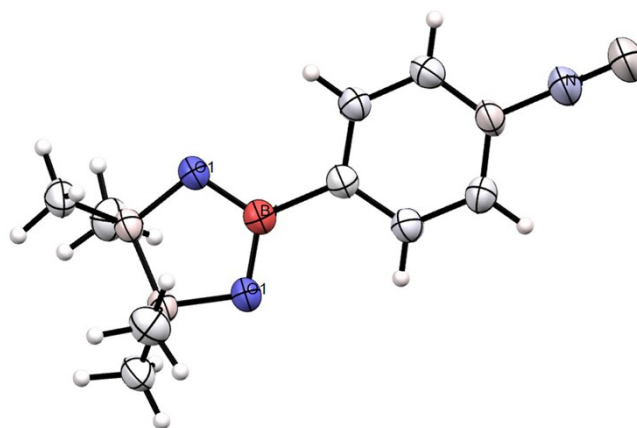

A clear light yellow column-like specimen of C<sub>13</sub>H<sub>16</sub>BNO<sub>2</sub>, approximate dimensions 0.72 mm x 0.28 mm x 0.19 mm, was used for the X-ray crystallographic analysis. The X-ray intensity data were collected.



Table 1. Crystal data and structure refinement for a17514.

|                                   |                                                  |                  |
|-----------------------------------|--------------------------------------------------|------------------|
| Identification code               | a17514                                           |                  |
| Empirical formula                 | C <sub>13</sub> H <sub>16</sub> BNO <sub>2</sub> |                  |
| Formula weight                    | 229.08                                           |                  |
| Temperature                       | 200(2) K                                         |                  |
| Wavelength                        | 0.71073 Å                                        |                  |
| Crystal system                    | Monoclinic                                       |                  |
| Space group                       | C 2/c                                            |                  |
| Unit cell dimensions              | a = 11.0964(5) Å                                 | ∠ = 90°.         |
|                                   | b = 13.2916(6) Å                                 | ∠ = 119.655(2)°. |
|                                   | c = 10.4278(7) Å                                 | ∠ = 90°.         |
| Volume                            | 1336.54(12) Å <sup>3</sup>                       |                  |
| Z                                 | 4                                                |                  |
| Density (calculated)              | 1.138 Mg/m <sup>3</sup>                          |                  |
| Absorption coefficient            | 0.075 mm <sup>-1</sup>                           |                  |
| F(000)                            | 488                                              |                  |
| Crystal size                      | 0.72 x 0.28 x 0.19 mm <sup>3</sup>               |                  |
| Theta range for data collection   | 4.07 to 25.00°.                                  |                  |
| Index ranges                      | -12 ≤ h ≤ 13, -15 ≤ k ≤ 15, -12 ≤ l ≤ 12         |                  |
| Reflections collected             | 3767                                             |                  |
| Independent reflections           | 1136 [R(int) = 0.0239]                           |                  |
| Completeness to theta = 24.96°    | 96.3 %                                           |                  |
| Absorption correction             | multi-scan                                       |                  |
| Max. and min. transmission        | 0.9859 and 0.9480                                |                  |
| Refinement method                 | Full-matrix least-squares on F <sup>2</sup>      |                  |
| Data / restraints / parameters    | 1136 / 0 / 82                                    |                  |
| Goodness-of-fit on F <sup>2</sup> | 1.022                                            |                  |
| Final R indices [I > 2σ(I)]       | R1 = 0.0372, wR2 = 0.0925                        |                  |
| R indices (all data)              | R1 = 0.0453, wR2 = 0.0996                        |                  |
| Largest diff. peak and hole       | 0.185 and -0.161 e.Å <sup>-3</sup>               |                  |

For the compound **2a**, the calculated absolute energy by DFT/B3LYP /6-31G(d,p) method was -735.174527 hartree (-461328.632263 kcal/mole), and the optimized atom coordinates of **2a** was collected in Table S1.

Table S1. The optimized atom coordinates of **2a** by DFT/B3LYP/6-31G(d,p) method.

| Optimized Atom Coordinates of <b>2a</b> |           |          |           |
|-----------------------------------------|-----------|----------|-----------|
| Atom                                    | x         | y        | z         |
| C                                       | 1.039562  | -9E-06   | -0.000154 |
| C                                       | 1.762386  | -1.19551 | 0.158532  |
| C                                       | 3.153152  | -1.20699 | 0.161158  |
| C                                       | 3.846857  | -4E-06   | 0.000006  |
| C                                       | 3.153164  | 1.206974 | -0.161223 |
| C                                       | 1.762397  | 1.195494 | -0.158747 |
| H                                       | 1.22171   | -2.12906 | 0.281753  |
| H                                       | 3.711216  | -2.12877 | 0.284297  |
| H                                       | 3.711229  | 2.128764 | -0.284307 |
| H                                       | 1.221738  | 2.129042 | -0.282029 |
| N                                       | 5.232021  | -7E-06   | 0.000082  |
| C                                       | 6.413525  | -1.1E-05 | 0.000144  |
| B                                       | -0.516824 | -5.1E-05 | -0.000212 |
| O                                       | -1.270261 | -1.12853 | 0.205195  |
| O                                       | -1.270276 | 1.12848  | -0.205407 |
| C                                       | -2.657529 | 0.78598  | 0.084366  |
| C                                       | -2.65766  | -0.78589 | -0.084316 |
| C                                       | -2.930555 | 1.24549  | 1.522035  |
| H                                       | -2.713745 | 2.314231 | 1.599273  |
| H                                       | -3.9747   | 1.084986 | 1.806056  |
| H                                       | -2.291649 | 0.719556 | 2.236772  |
| C                                       | -3.554668 | 1.544545 | -0.890683 |
| H                                       | -3.283042 | 1.345092 | -1.92847  |
| H                                       | -4.605176 | 1.272414 | -0.745185 |
| H                                       | -3.457295 | 2.619874 | -0.717193 |
| C                                       | -3.554563 | -1.54447 | 0.890945  |
| H                                       | -4.605097 | -1.27221 | 0.74585   |
| H                                       | -3.457379 | -2.61978 | 0.717248  |
| H                                       | -3.282582 | -1.34522 | 1.928672  |
| C                                       | -2.930964 | -1.24549 | -1.521887 |
| H                                       | -2.292326 | -0.71952 | -2.236839 |
| H                                       | -2.714056 | -2.31421 | -1.599132 |
| H                                       | -3.975206 | -1.08512 | -1.805647 |

2-(4-(isocyanomethyl)phenyl)-4,4,5,5-tetramethyl-1,3,2-dioxaborolane (**2b**)

<sup>1</sup>H-NMR (600 MHz, CDCl<sub>3</sub>)

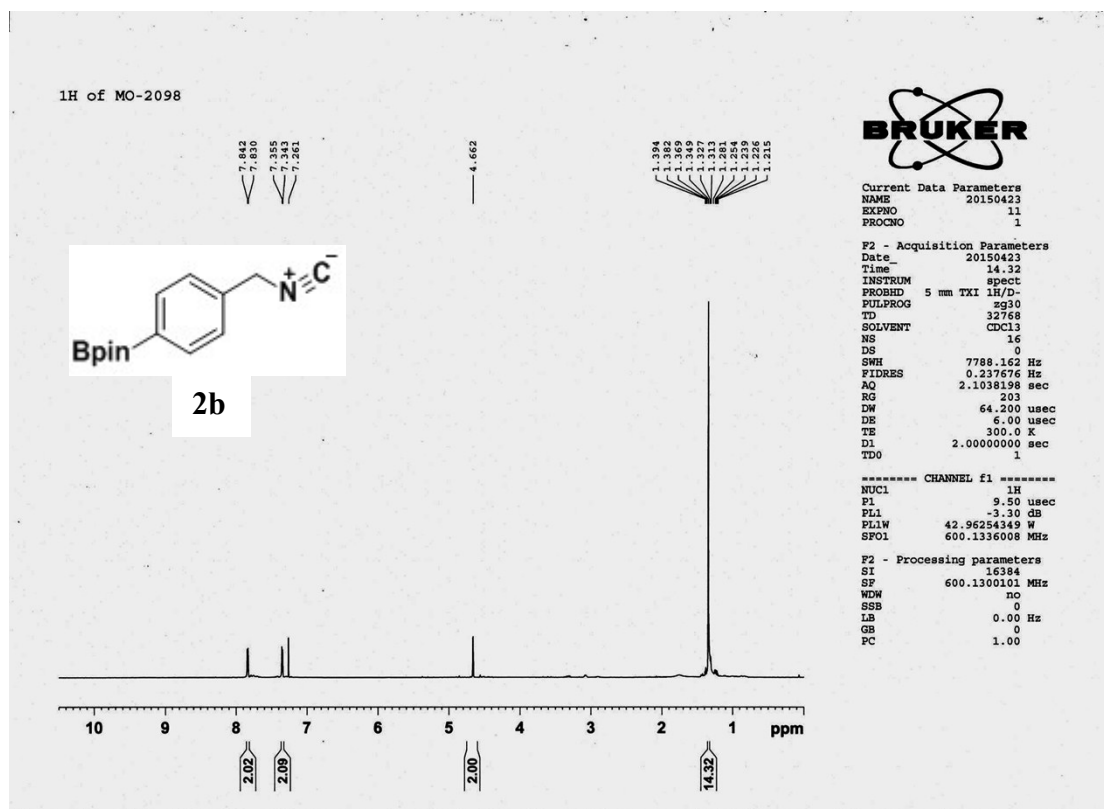

<sup>13</sup>C-NMR (150 MHz, CDCl<sub>3</sub>)

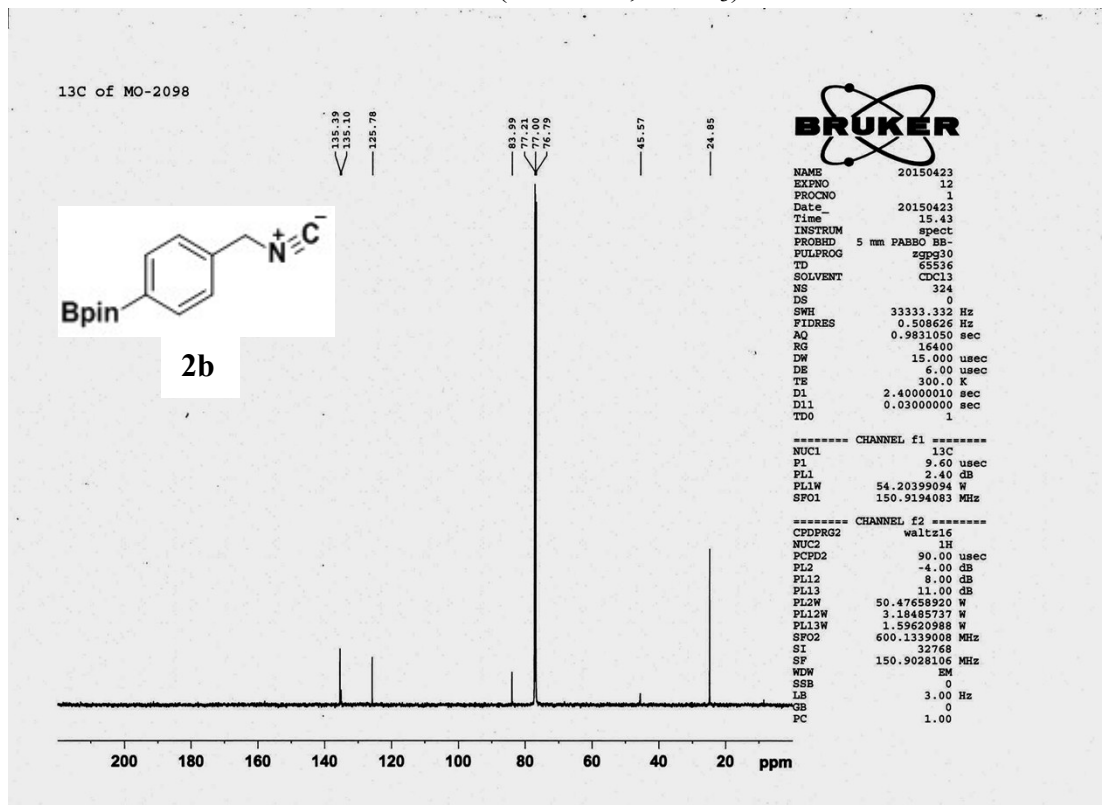

<sup>11</sup>B-NMR (193 MHz, CDCl<sub>3</sub>)

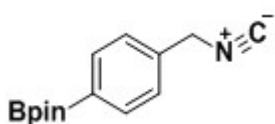

158-B

30.88

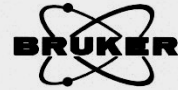

Current Data Parameters  
NAME 20150415  
EXPNO 159  
PROCNO 1

F2 - Acquisition Parameters  
Date 20150415  
Time 9.12  
INSTRUM spect  
PROBHD 5 mm PABBO B3-  
PULPROG zg  
TD 65430  
SOLVENT CDCl3  
NS 200  
DS 4  
SWH 23148.148 Hz  
FIDRES 0.353795 Hz  
AQ 1.4133596 sec  
RG 1290  
DW 21.600 usec  
DE 6.50 usec  
TE 300.0 K  
D1 1.0000000 sec  
TDO 1

\*\*\*\*\* CHANNEL f1 \*\*\*\*\*  
NUC1 11B  
P1 12.80 usec  
PL1 3.00 dB  
SFO1 192.545530 MHz

F2 - Processing parameters  
SI 32768  
SF 192.545530 MHz  
WDW EM  
SSB 0  
LB 1.00 Hz  
GB 0  
PC 1.40

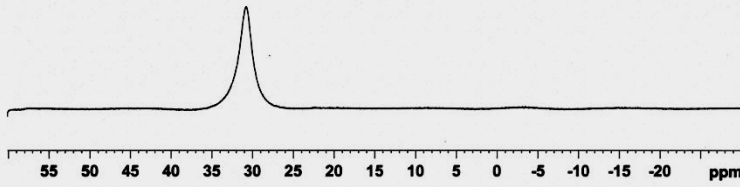

### IR (KBr)

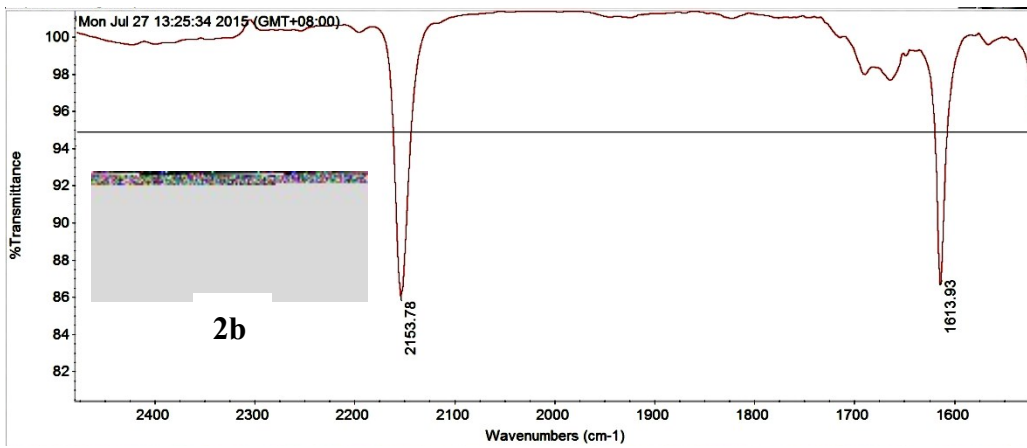

### HRMS

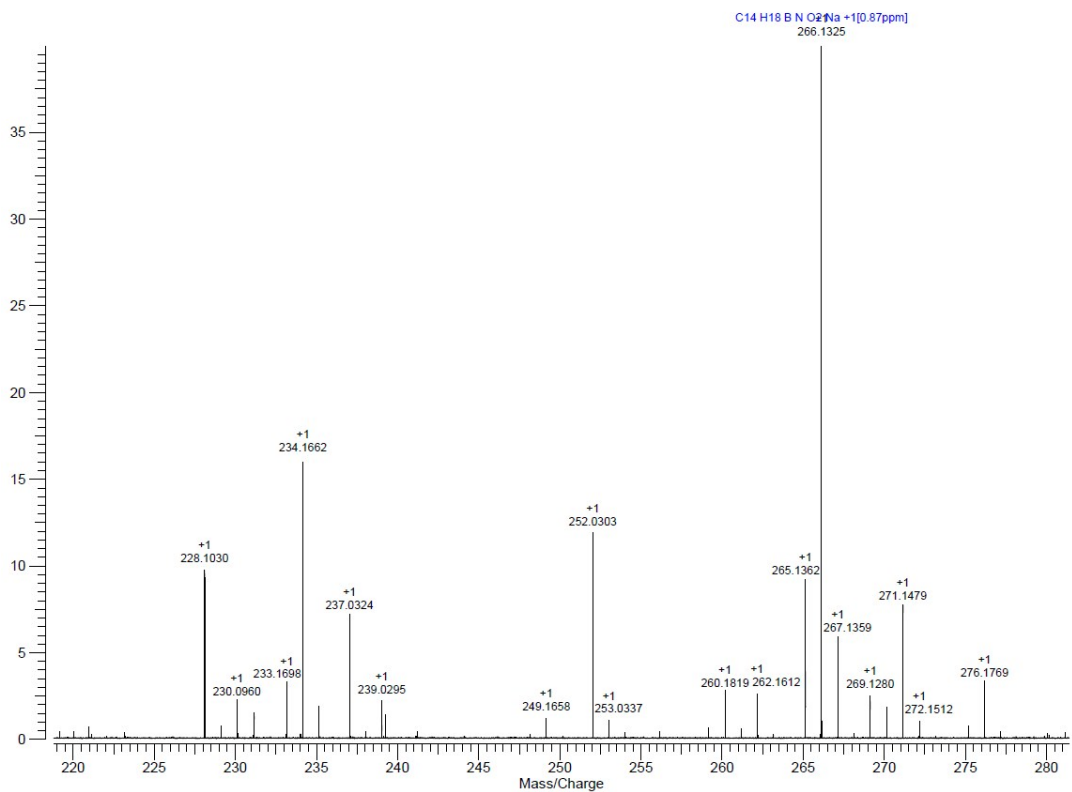

2-(3-(isocyanomethyl)phenyl)-4,4,5,5-tetramethyl-1,3,2-dioxaborolane (2c)

<sup>1</sup>H-NMR (600 MHz, CDCl<sub>3</sub>)

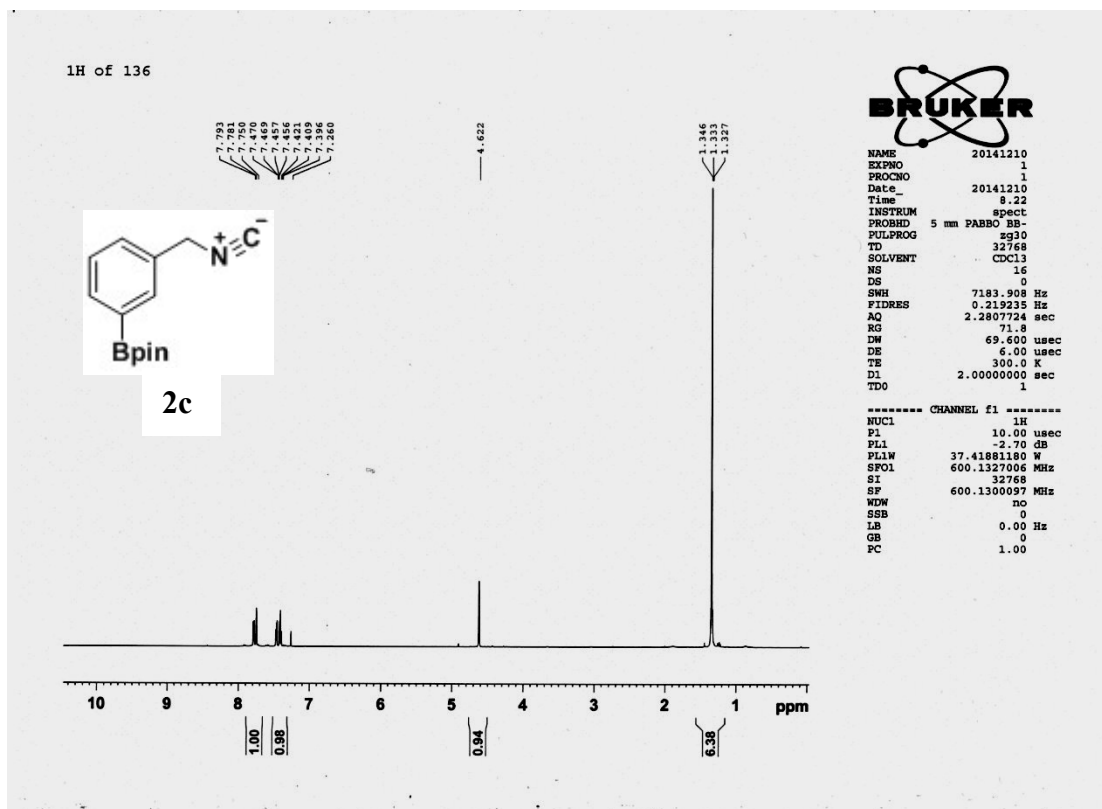

<sup>13</sup>C-NMR (150 MHz, CDCl<sub>3</sub>)

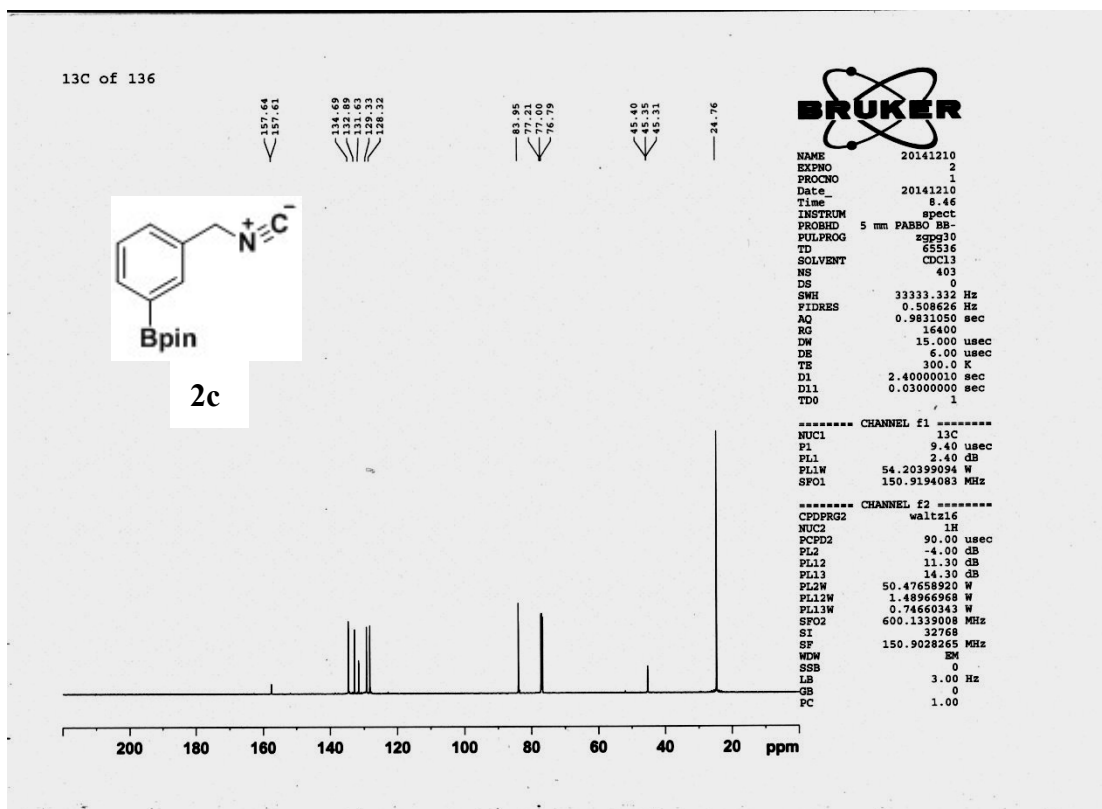

$^{11}\text{B}$ -NMR (193 MHz,  $\text{CDCl}_3$ )

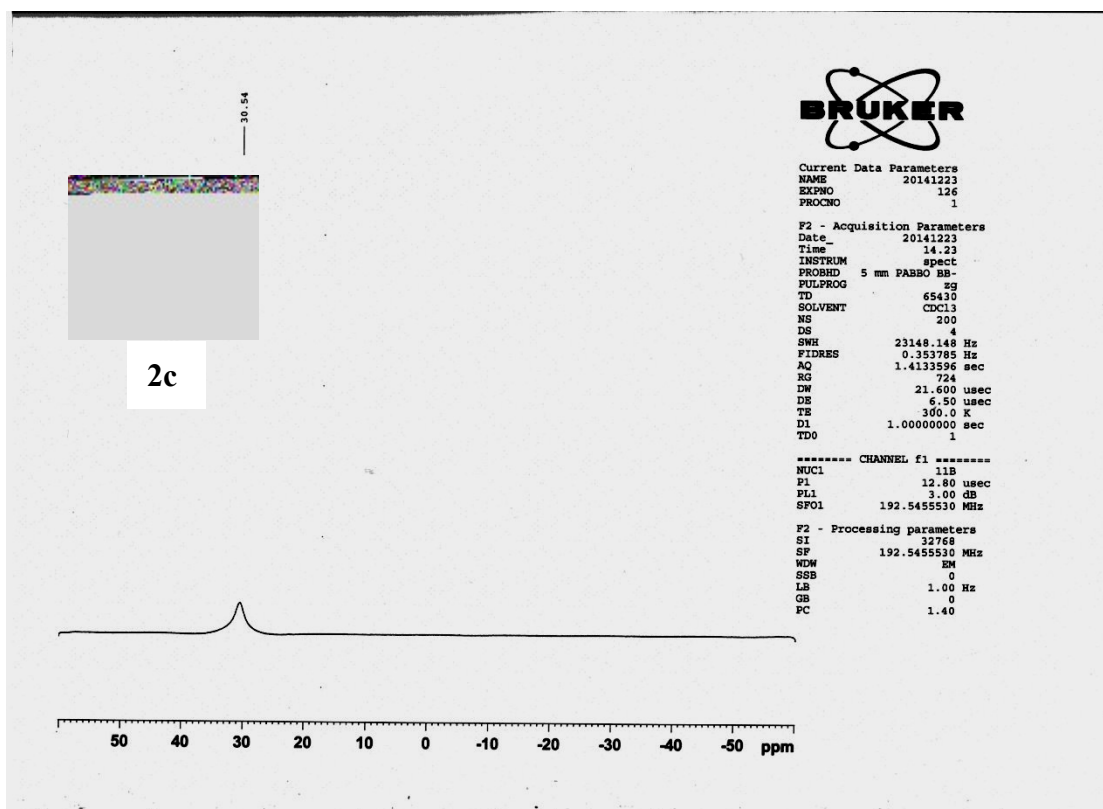

IR (KBr)

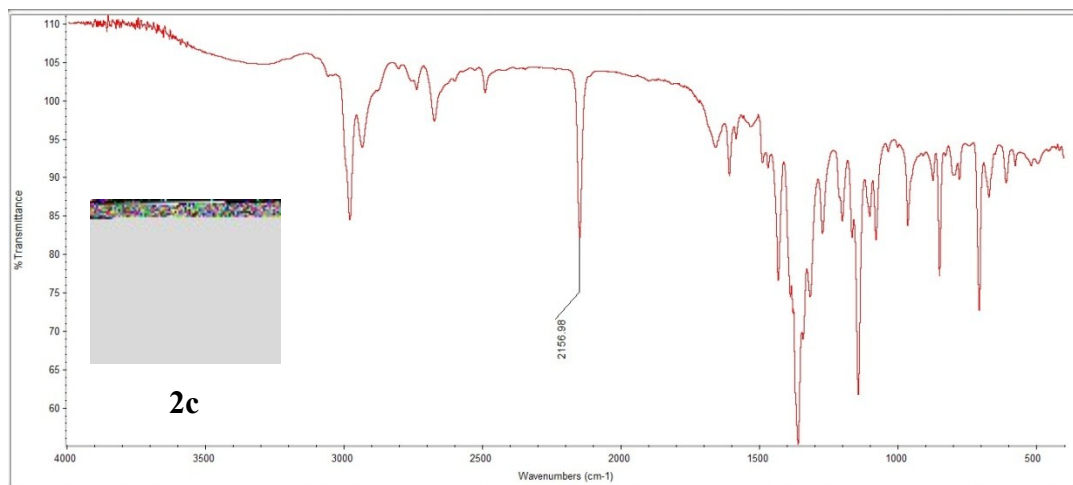

# HRMS

Varian MS  
File: D:\2015-06\0629\SMS0053020150629\_#1(HR)-1\_ESI.trans  
Recent Acquire  
Base-Peak Amplitude: 18.7967 Total Intensity: 100.800 Scans: 1 Positive Ions  
Broadband ADC Rate: 2000000 ADC Gain: X1 Transient Points: 2048K

Remove Noises 29-JUN-2015 10:15:13

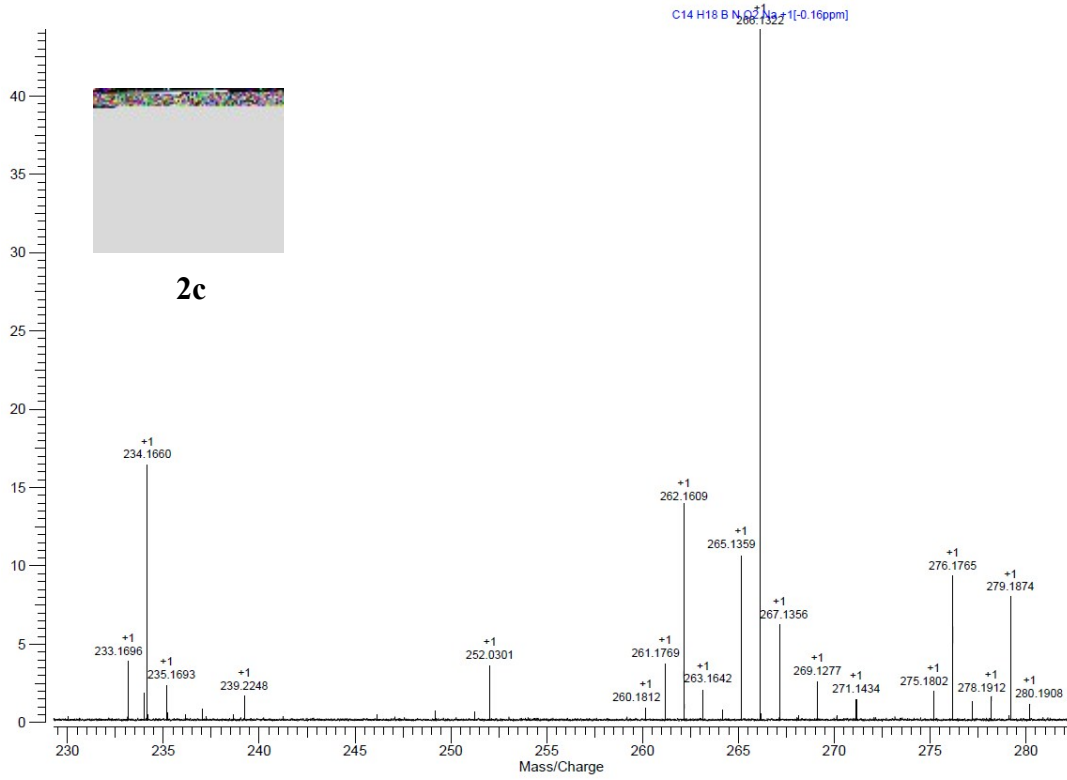



2-(4-fluoro-3-(isocyanomethyl)phenyl)-4,4,5,5-tetramethyl-1,3,2-dioxaborolane (**2d**)

<sup>1</sup>H-NMR (600 MHz, CDCl<sub>3</sub>)

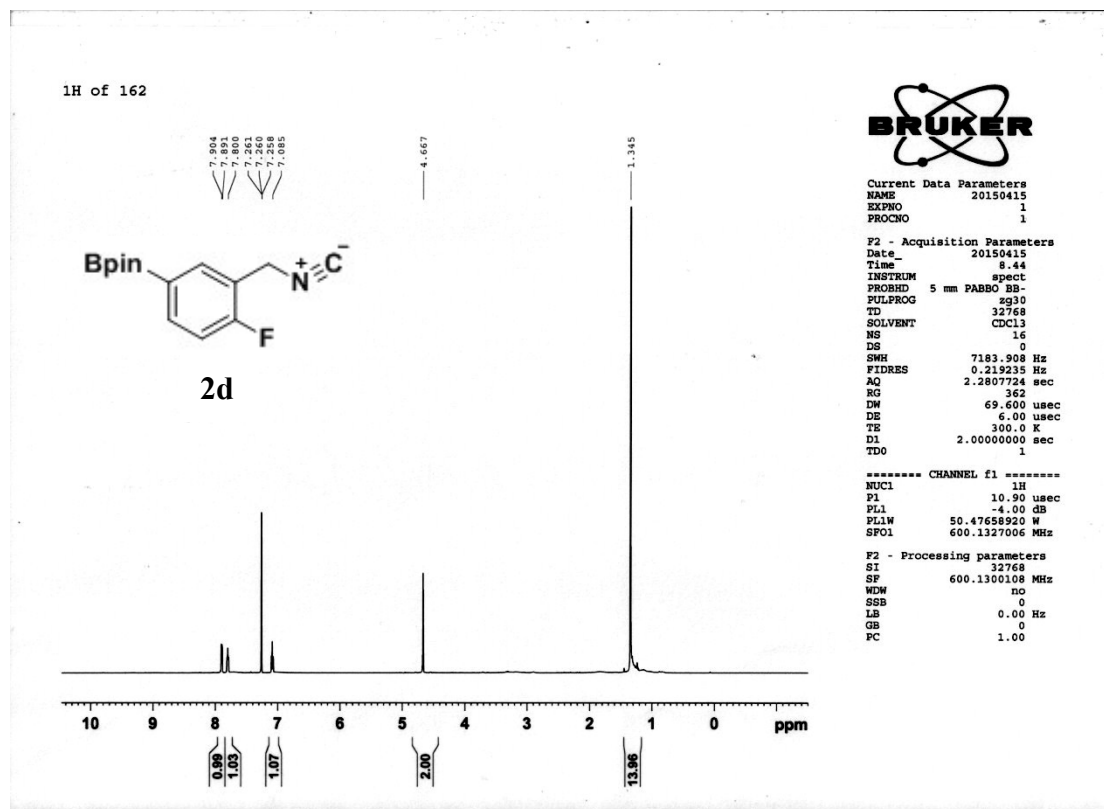

<sup>13</sup>C-NMR (150 MHz, CDCl<sub>3</sub>)

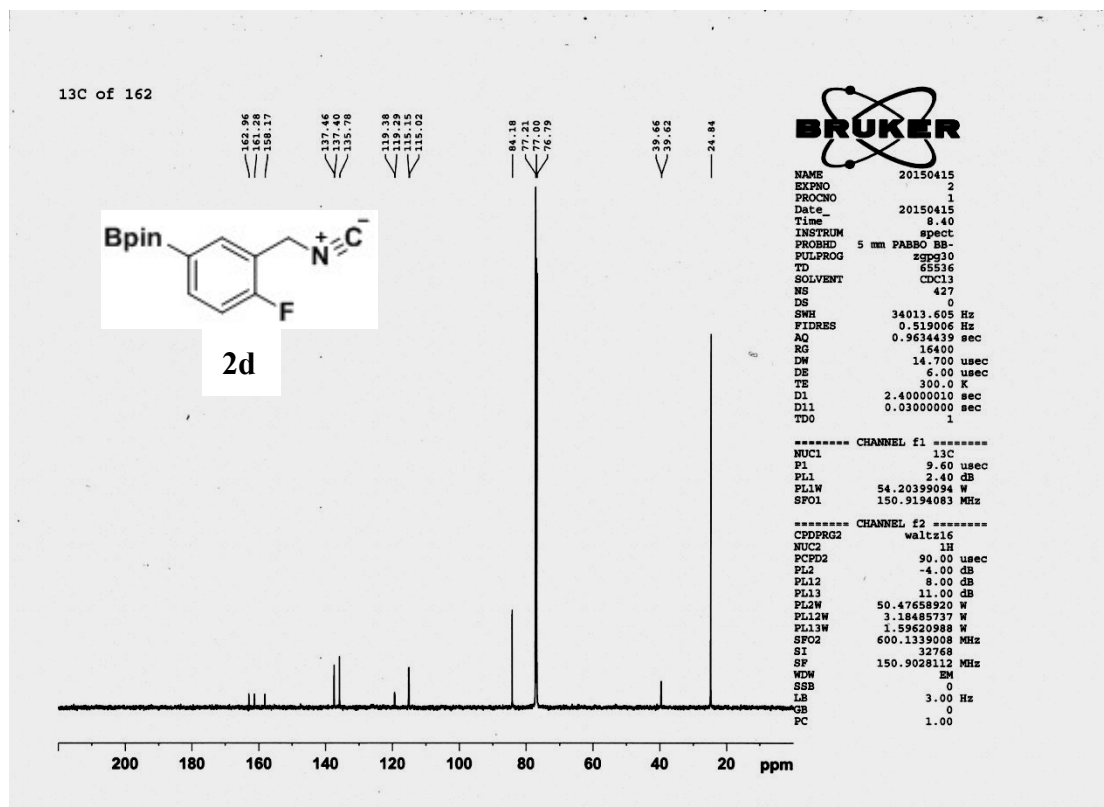

<sup>11</sup>B-NMR (193 MHz, CDCl<sub>3</sub>)

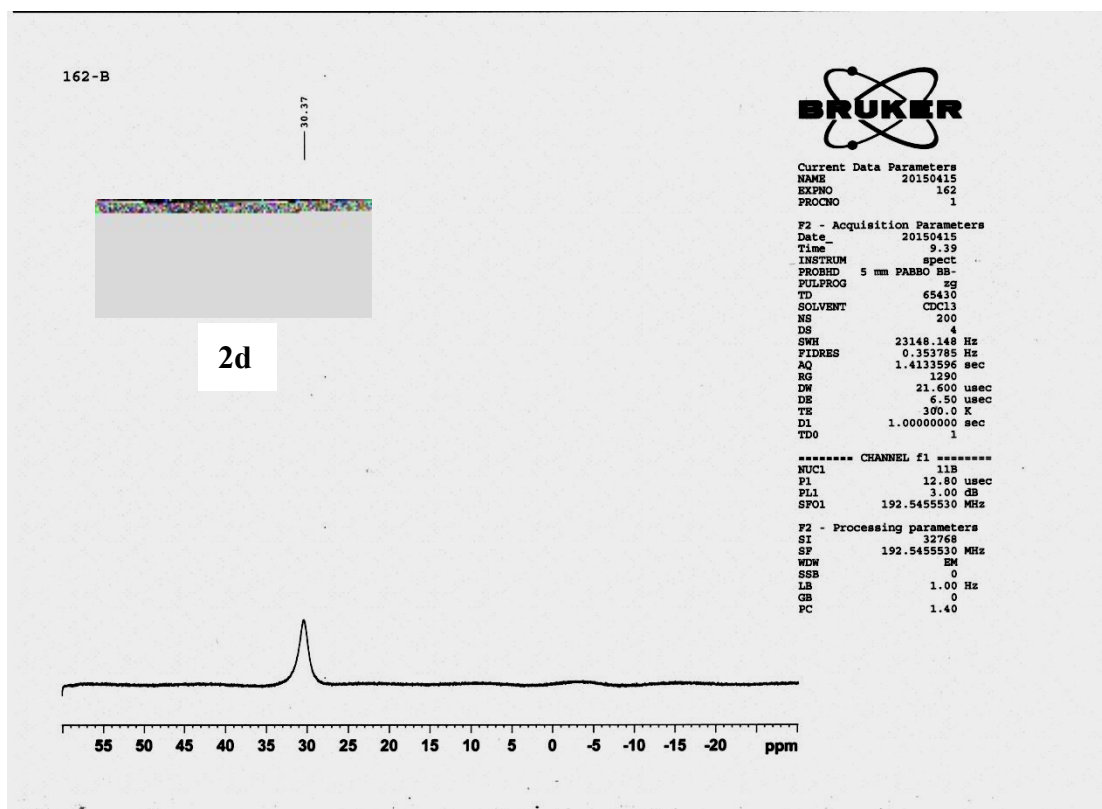

<sup>19</sup>F-NMR

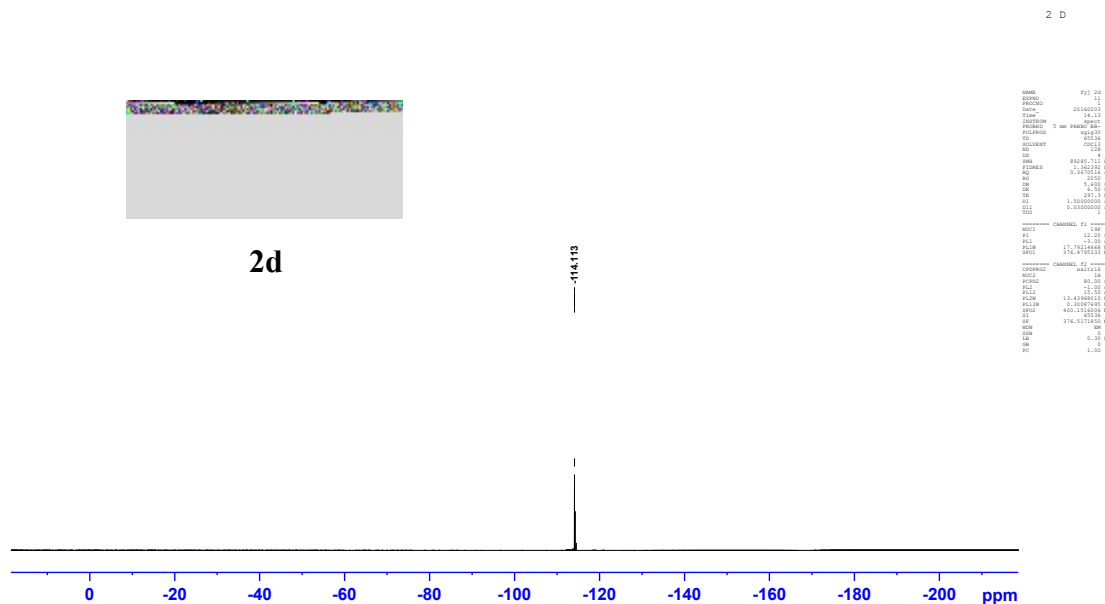

# IR (KBr)

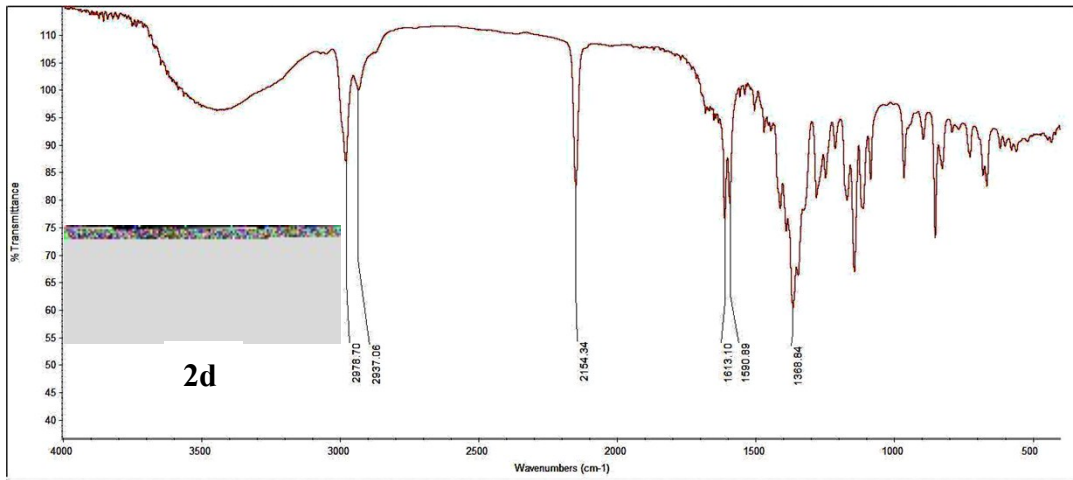

# HRMS

D:\QE Data\Sun\20150902\data09

09/02/15 15:42:56

2d

data09 #7-11 RT: 0.07-0.11 AV: 3 NL: 4.77E7  
T: FTMS + p ESI Full ms [100.00-700.00]

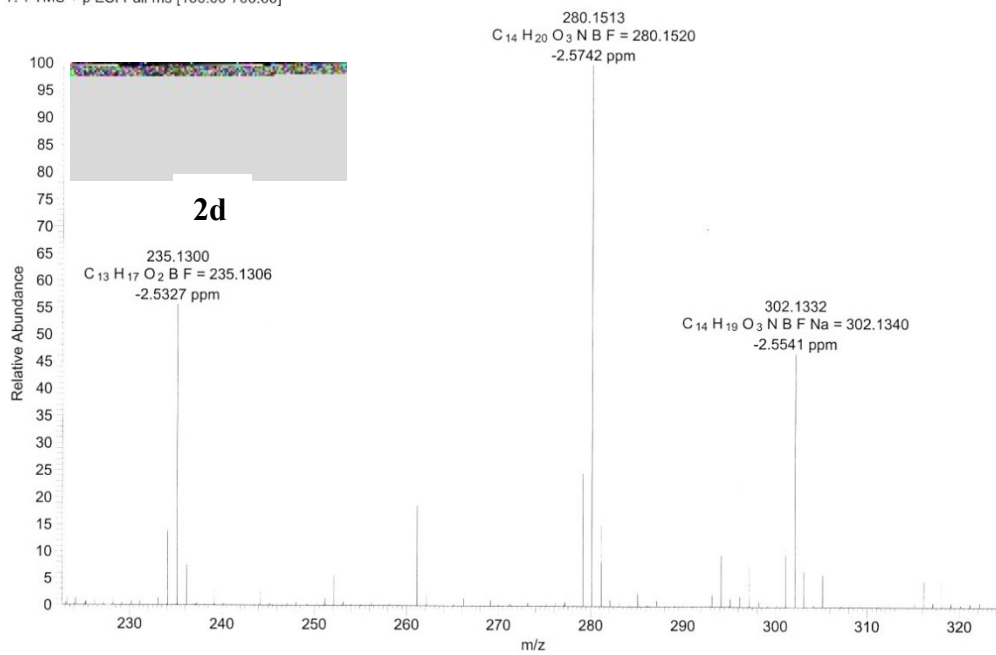

2-(2-fluoro-5-(isocyanomethyl)phenyl)-4,4,5,5-tetramethyl-1,3,2-dioxaborolane (2e)  
<sup>1</sup>H-NMR (600 MHz, CDCl<sub>3</sub>)

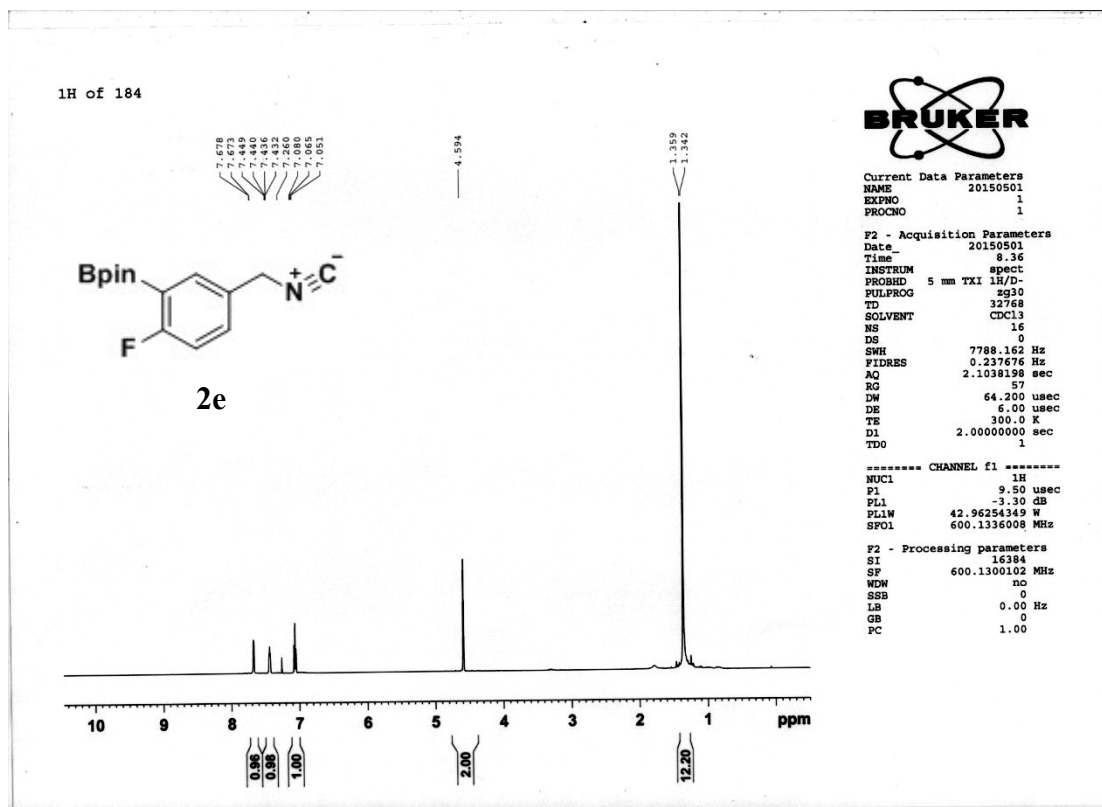

<sup>13</sup>C-NMR (150 MHz, CDCl<sub>3</sub>)

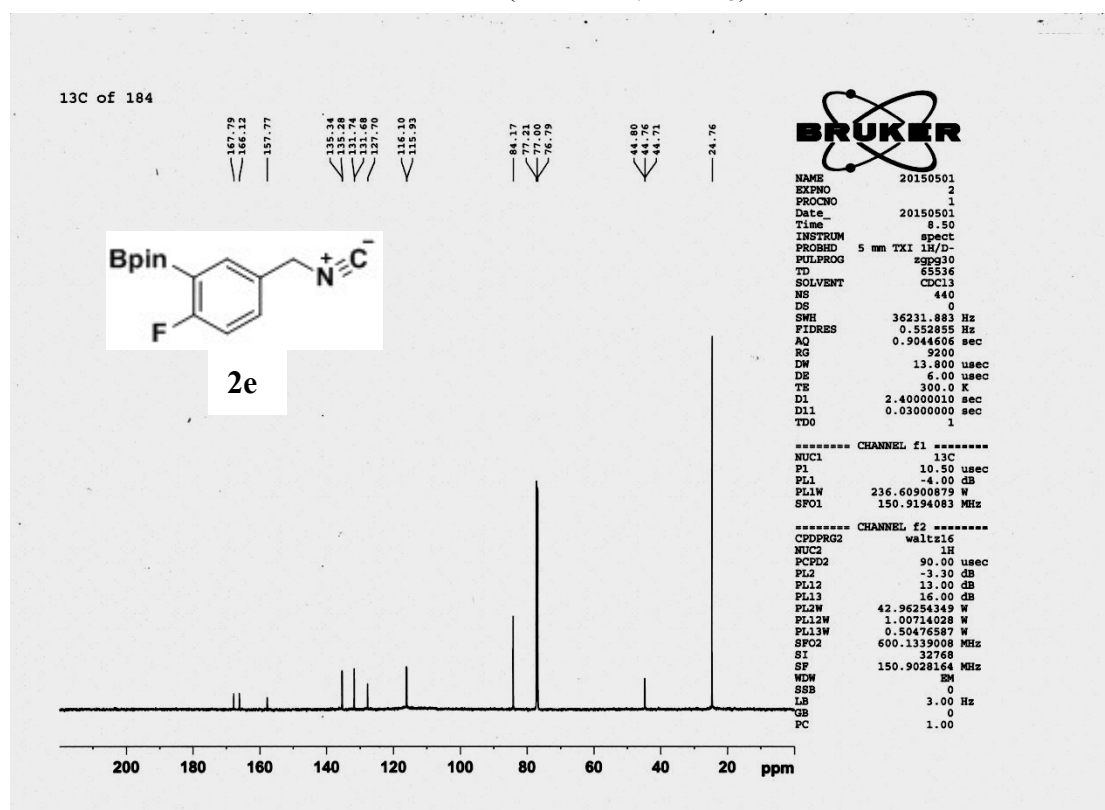

$^{11}\text{B}$ -NMR (193 MHz,  $\text{CDCl}_3$ )

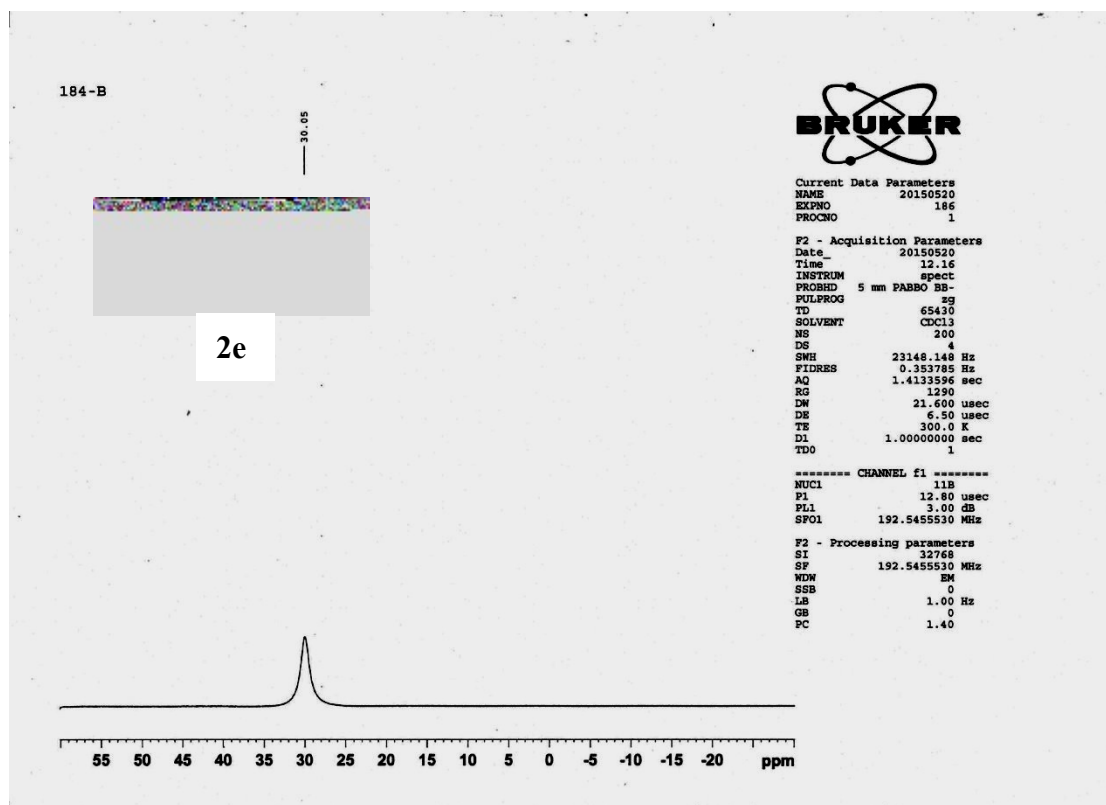

$^{19}\text{F}$ -NMR

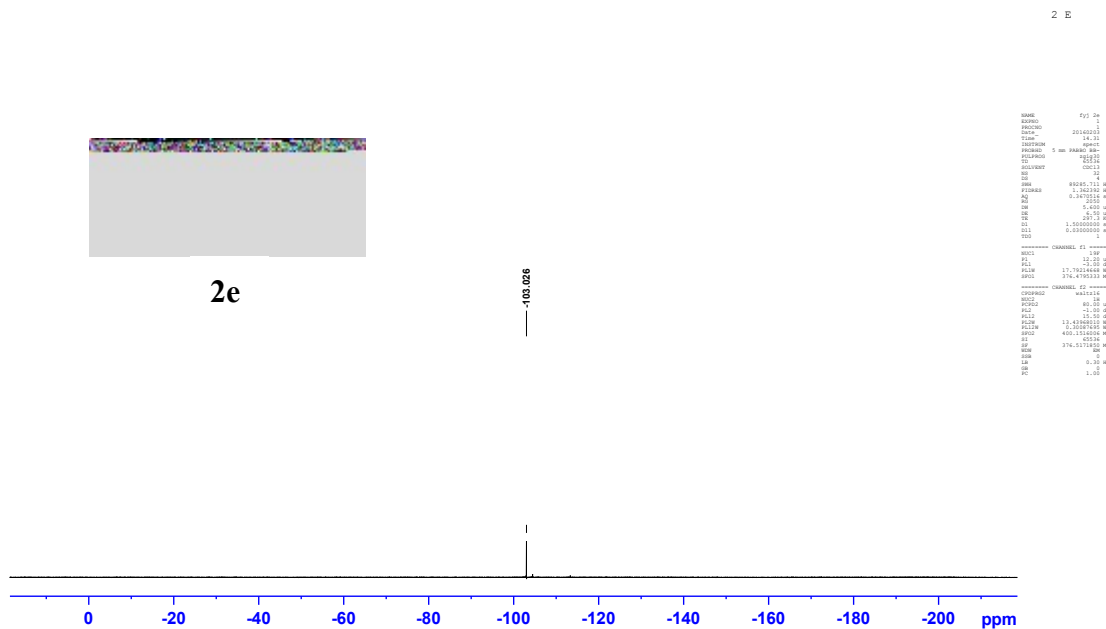

# IR (KBr)

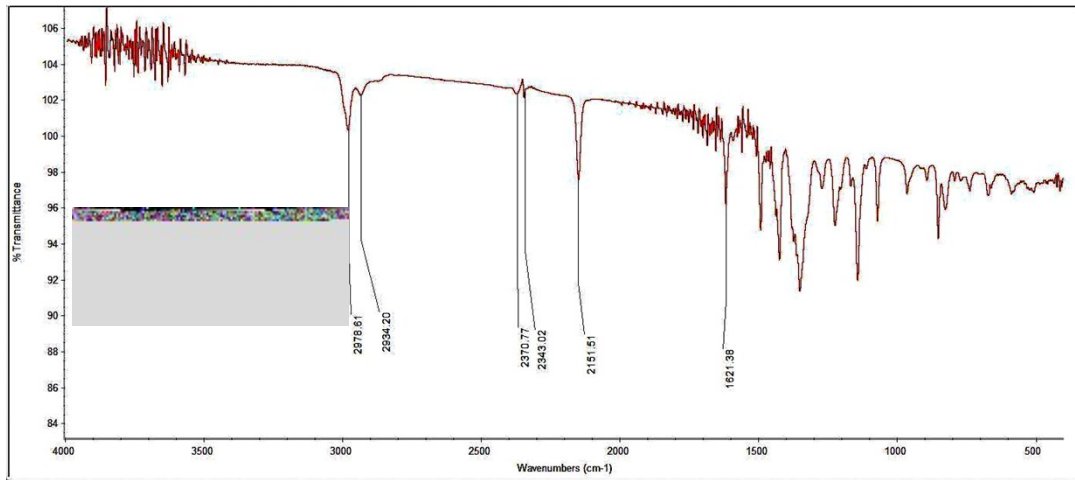

# HRMS

D:\QE Data\Sun\20150902\data10

09/02/15 15:46:25

2e

data10 #7-11 RT: 0.07-0.11 AV: 3 NL: 6.43E7  
T: FTMS + p ESI Full ms [100.00-700.00]

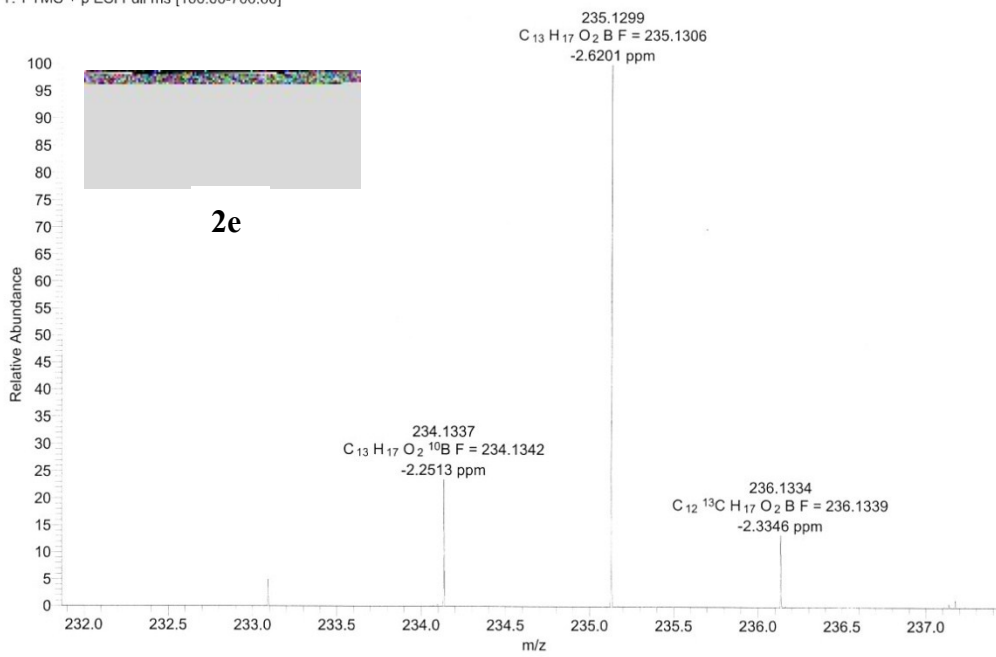

2-(2-fluoro-4-(isocyanomethyl)phenyl)-4,4,5,5-tetramethyl-1,3,2-dioxaborolane (2f)

<sup>1</sup>H-NMR (600 MHz, CDCl<sub>3</sub>)

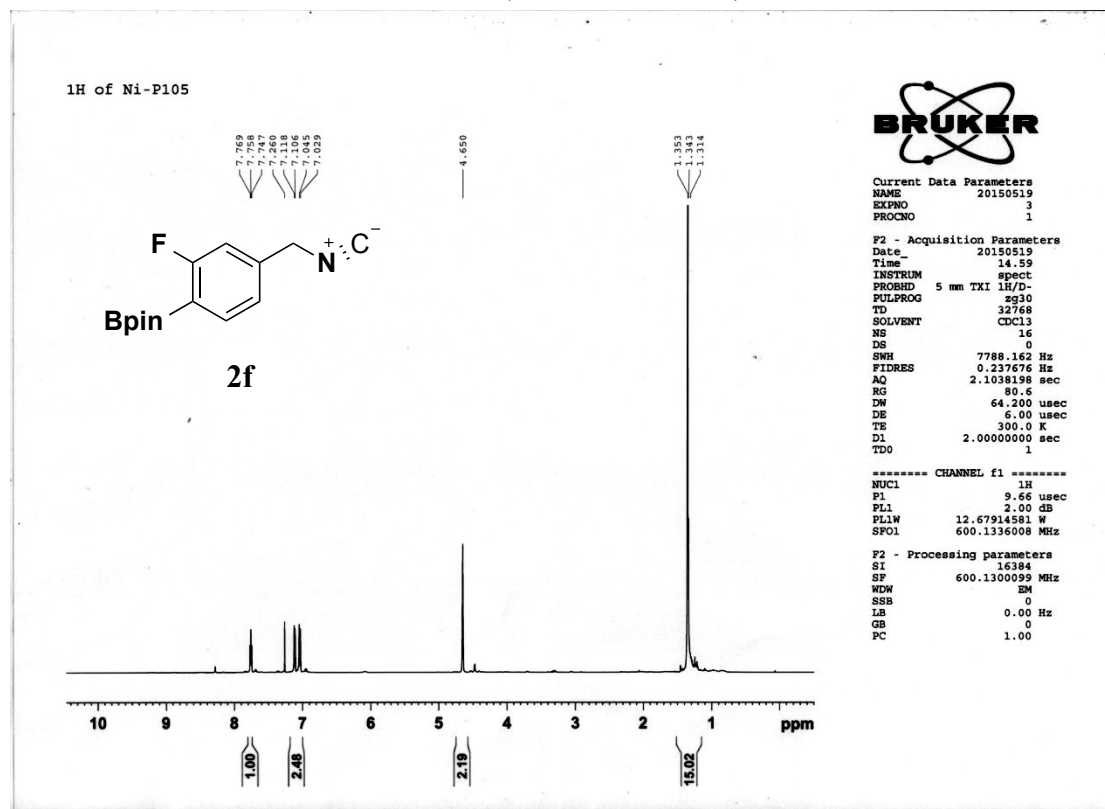

<sup>13</sup>C-NMR (150 MHz, CDCl<sub>3</sub>)

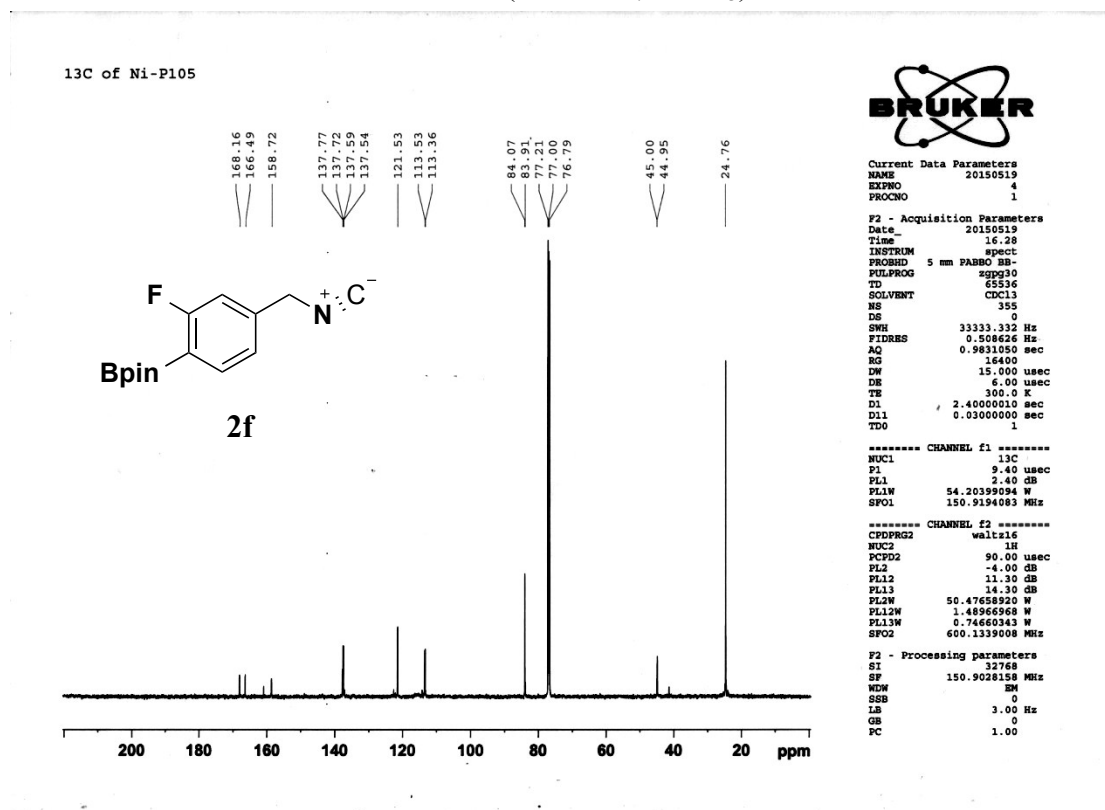

<sup>11</sup>B-NMR (193 MHz, CDCl<sub>3</sub>)

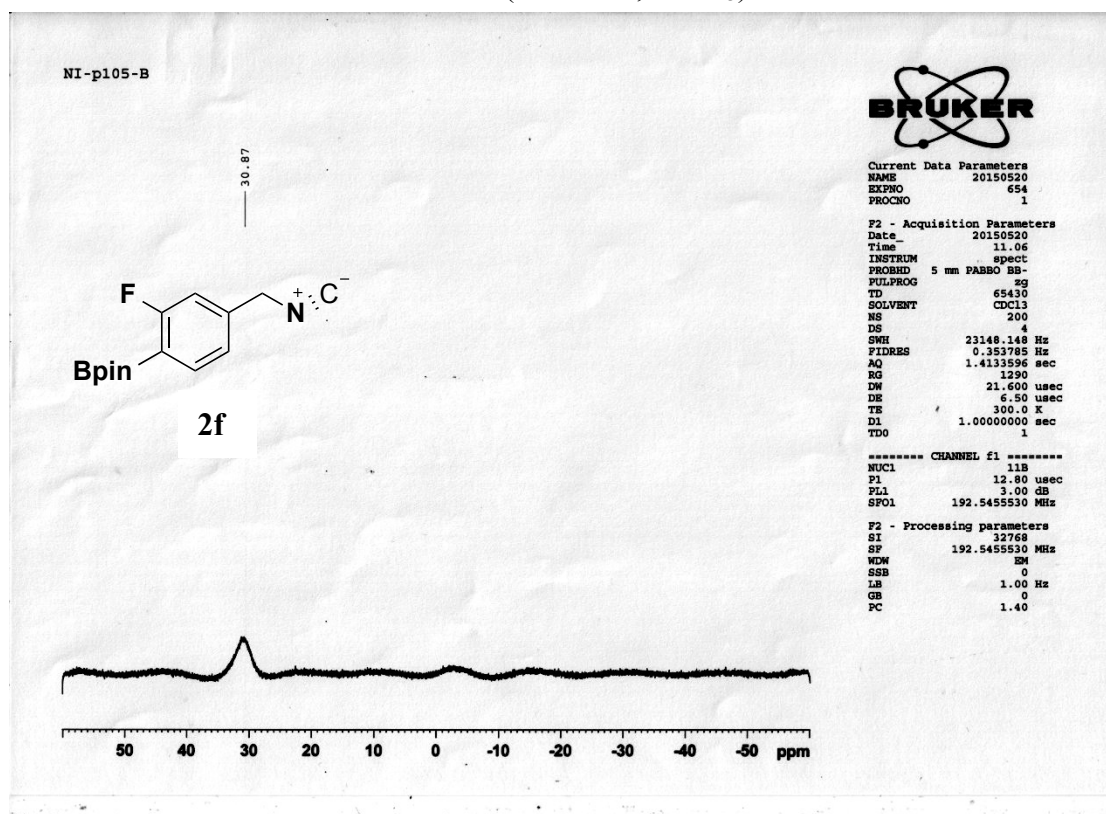

<sup>19</sup>F-NMR

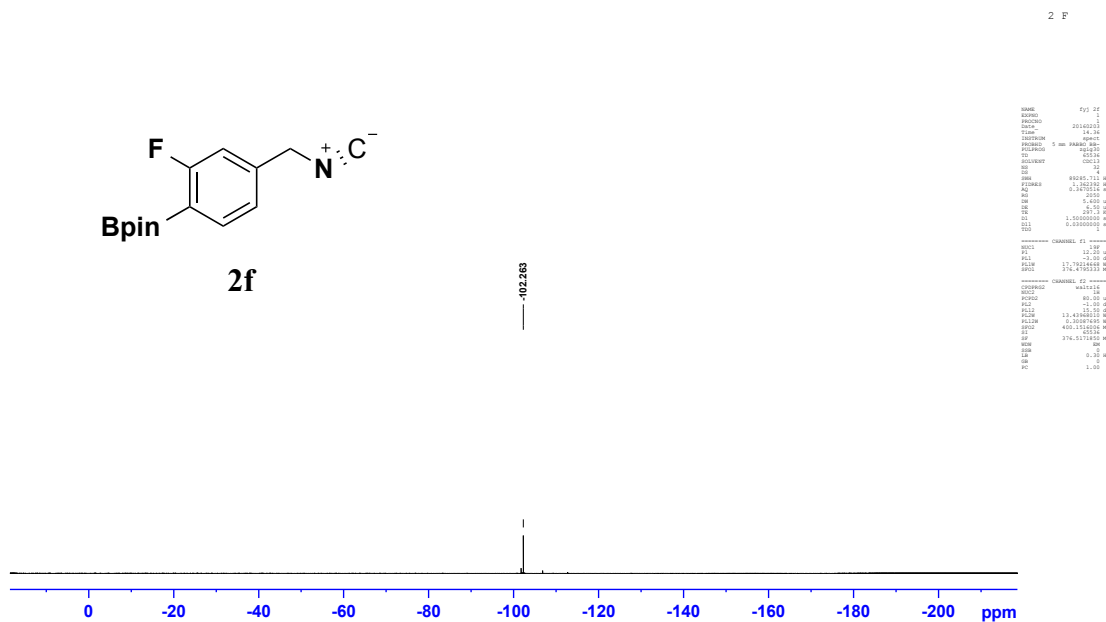



### IR (KBr)

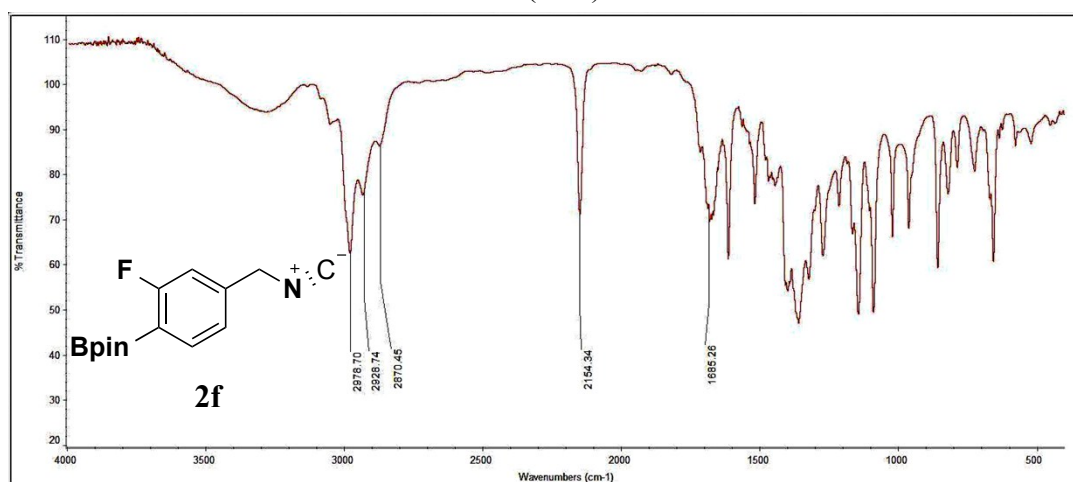

### HRMS

Varian MS  
File: D:\2015-06\0629\SMS0053020150629\_#4(HR)\_ESI.trans  
Base-Peak Amplitude: 9.9324 Total Intensity: 76.250 Scans: 1 Positive Ions  
Broadband ADC Rate: 2000000 ADC Gain: X1 Transient Points: 2048K

Remove Noises 29-JUN-2015 10:48:38

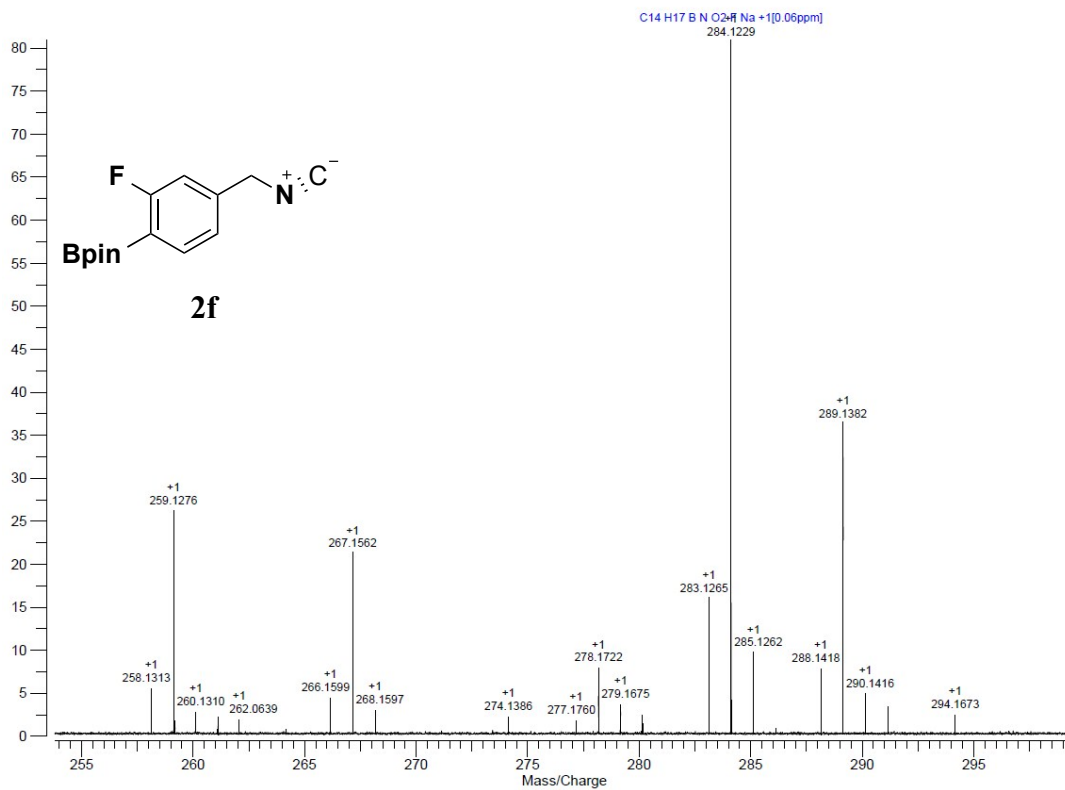

2-(2-chloro-5-(isocyanomethyl)phenyl)-4,4,5,5-tetramethyl-1,3,2-dioxaborolane (**2g**)  
<sup>1</sup>H-NMR (600 MHz, CDCl<sub>3</sub>)

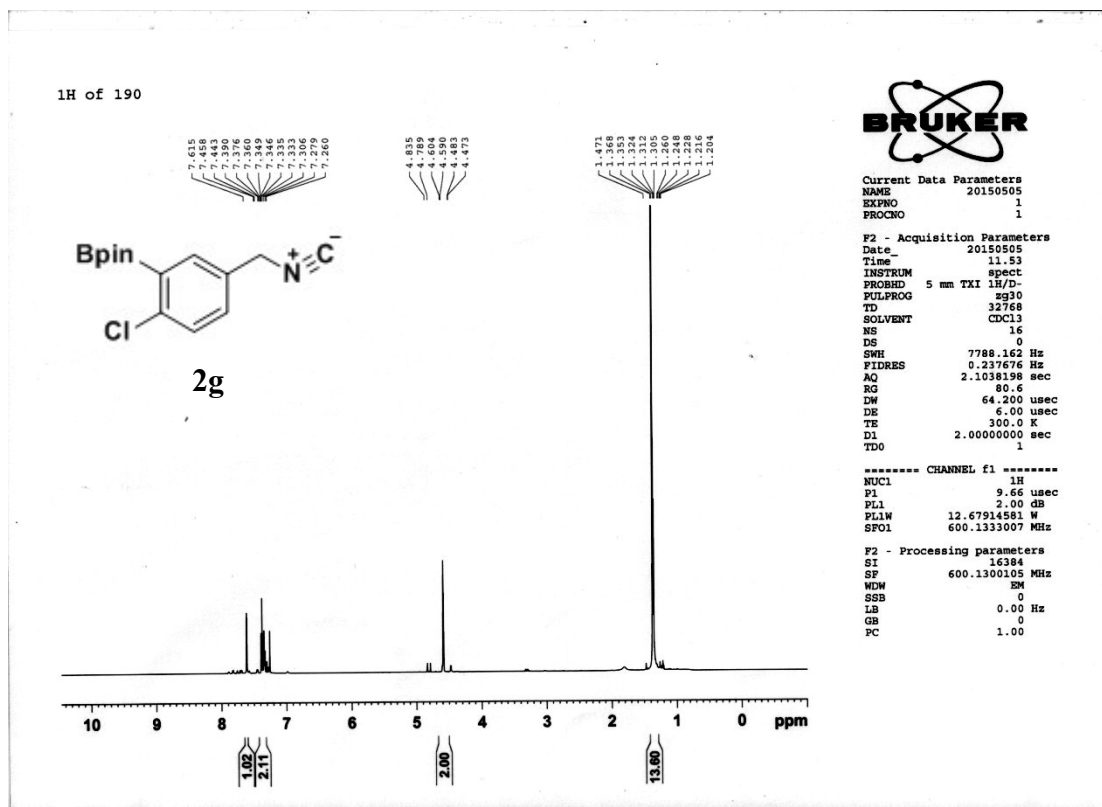

<sup>13</sup>C-NMR (150 MHz, CDCl<sub>3</sub>)

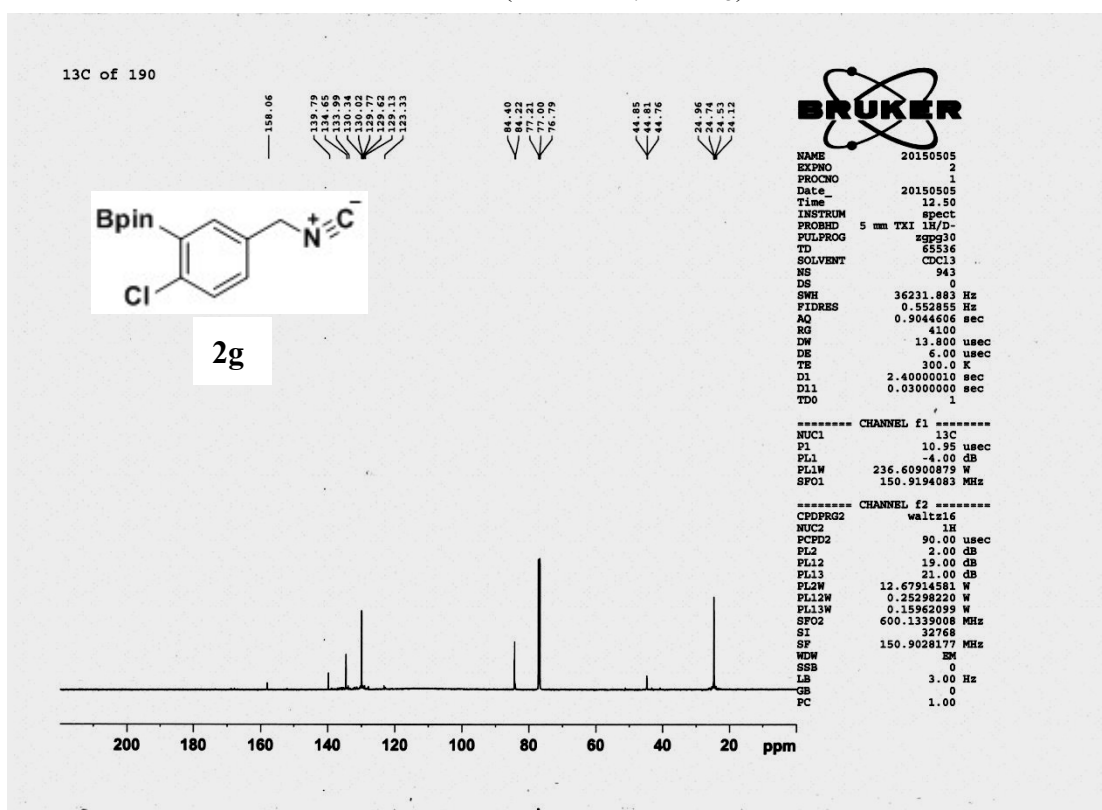

$^{11}\text{B}$ -NMR (193 MHz,  $\text{CDCl}_3$ )

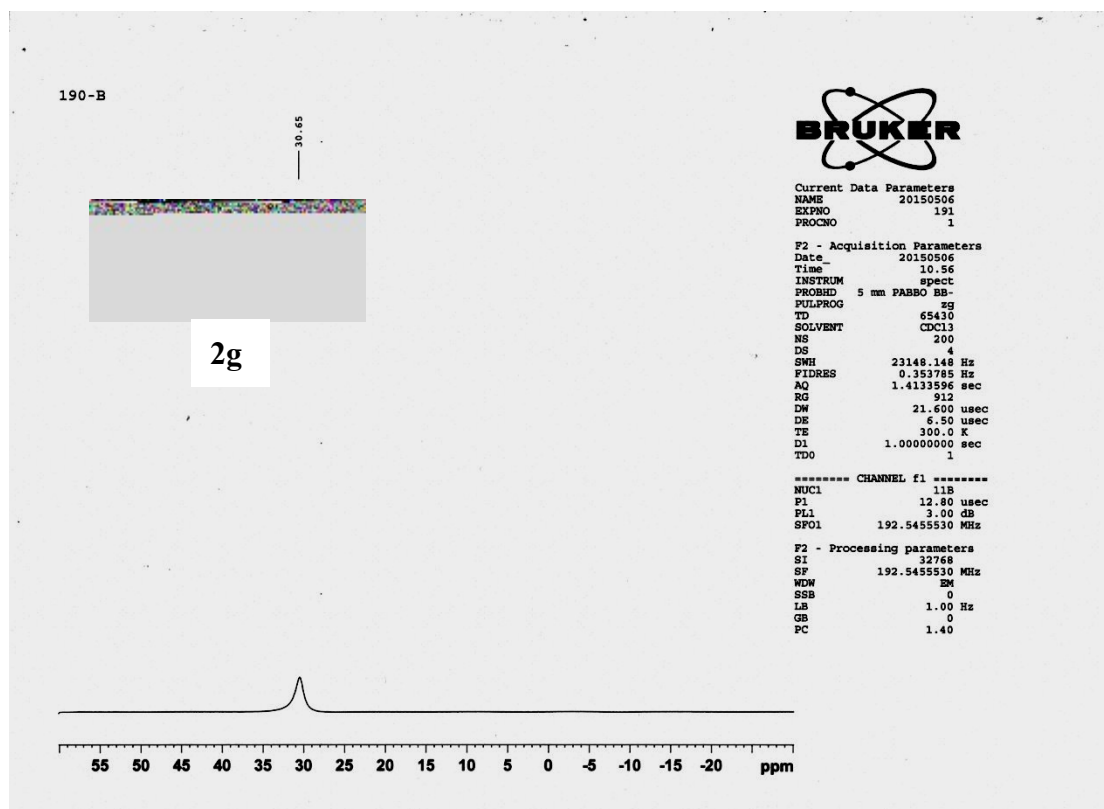

IR (KBr)

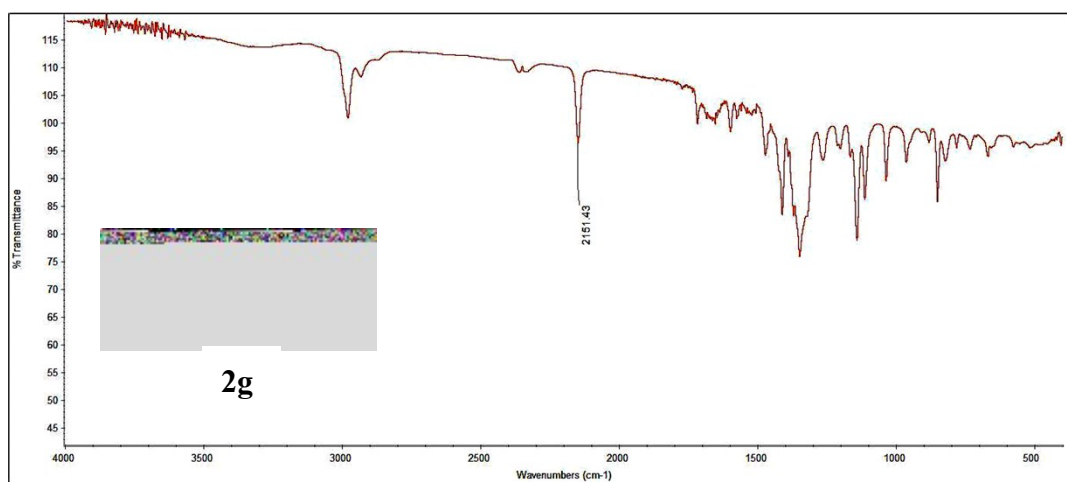

# HRMS

D:\QE Data\Sun\20150728\data28

07/29/15 16:24:39

6

data28 #9-17 RT: 0.07-0.13 AV: 5 NL: 1.12E8  
T: FTMS + p ESI Full ms [50.00-500.00]

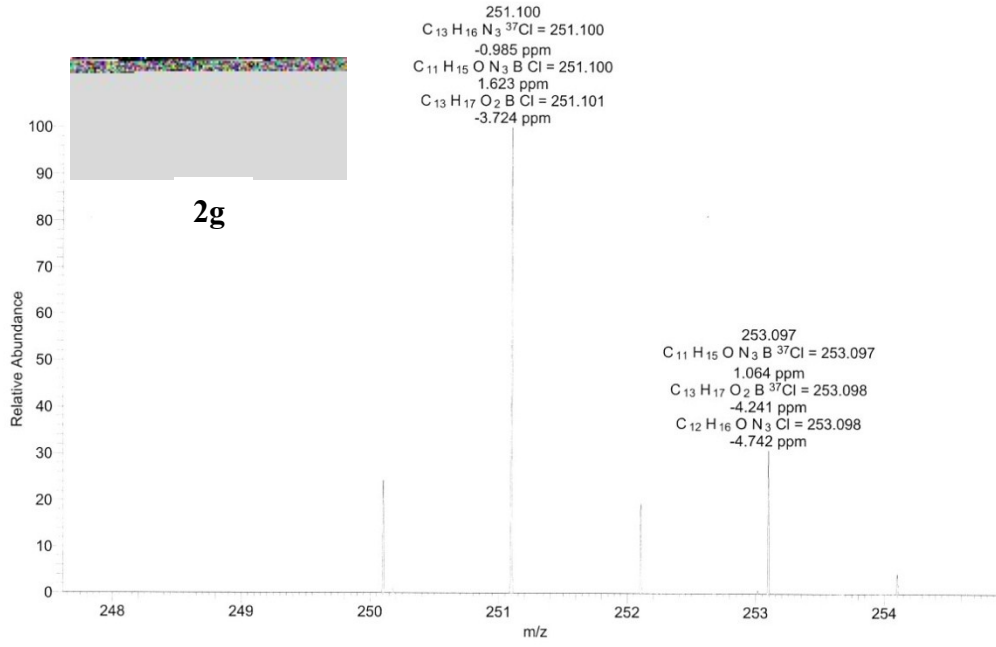

2-(3-(isocyanomethyl)-4-methylphenyl)-4,4,5,5-tetramethyl-1,3,2-dioxaborolane (**2h**)

<sup>1</sup>H-NMR (600 MHz, CDCl<sub>3</sub>)

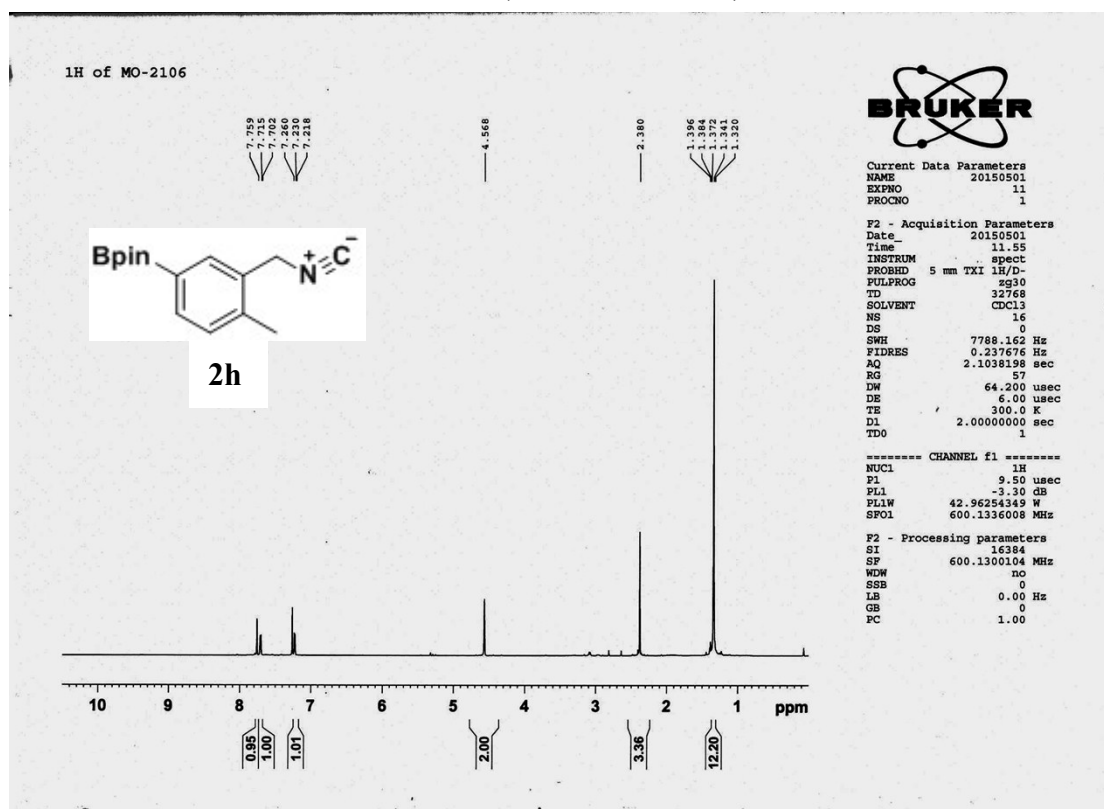

<sup>13</sup>C-NMR (150 MHz, CDCl<sub>3</sub>)

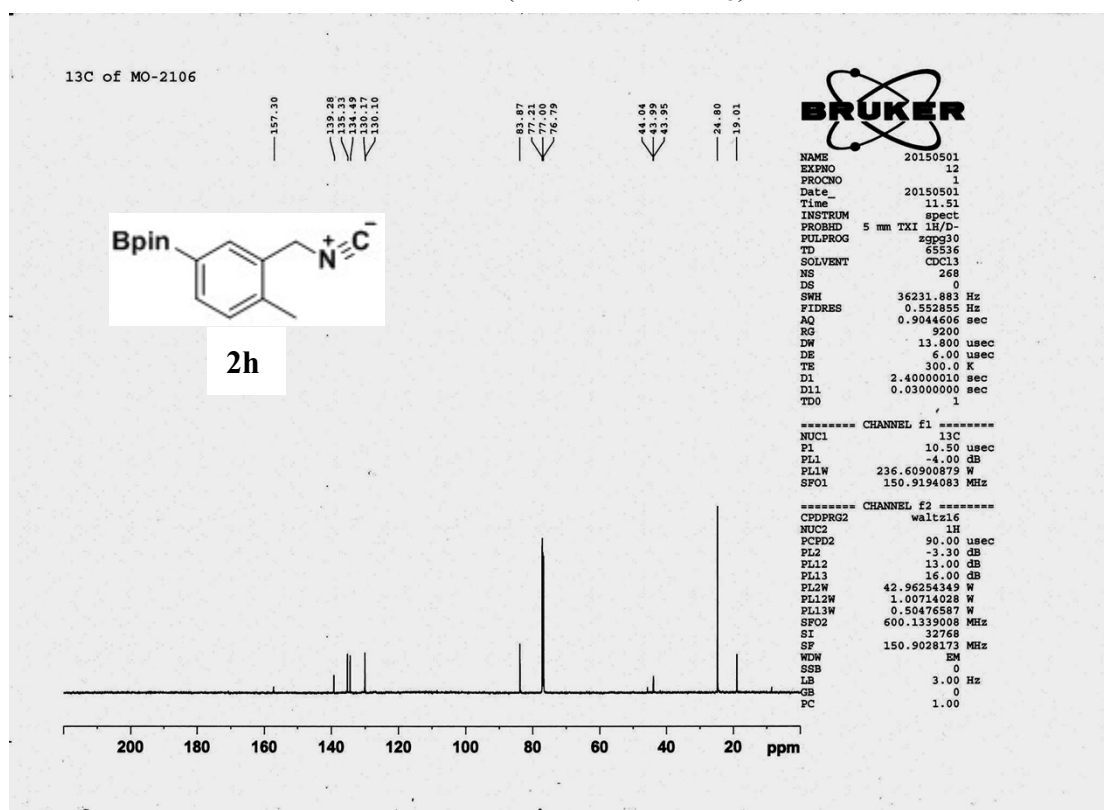

$^{11}\text{B}$ -NMR (193 MHz,  $\text{CDCl}_3$ )

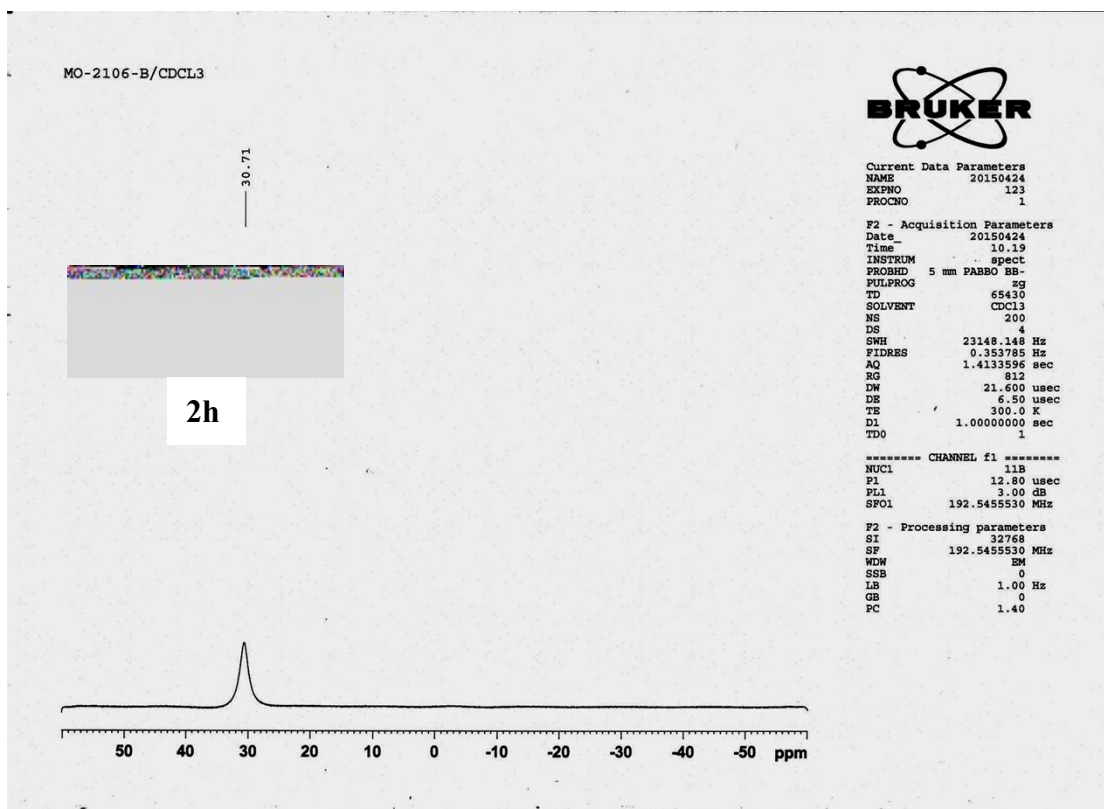

IR (KBr)

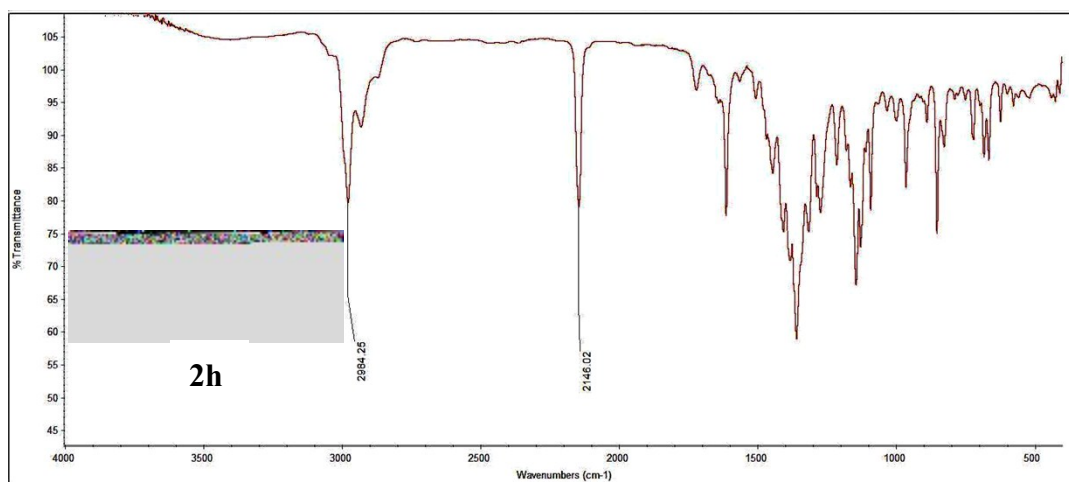

# HRMS

Varian MS  
File: D:\2015-06\0629\MSMS0053020150629\_#5(HR)-1\_ESI.trans  
Base-Peak Amplitude: 164.7707 Total Intensity: 568.869 Scans: 1 Positive Ions  
Broadband ADC Rate: 2000000 ADC Gain: X1 Transient Points: 2048K

Remove Noises 29-JUN-2015 11:32:54

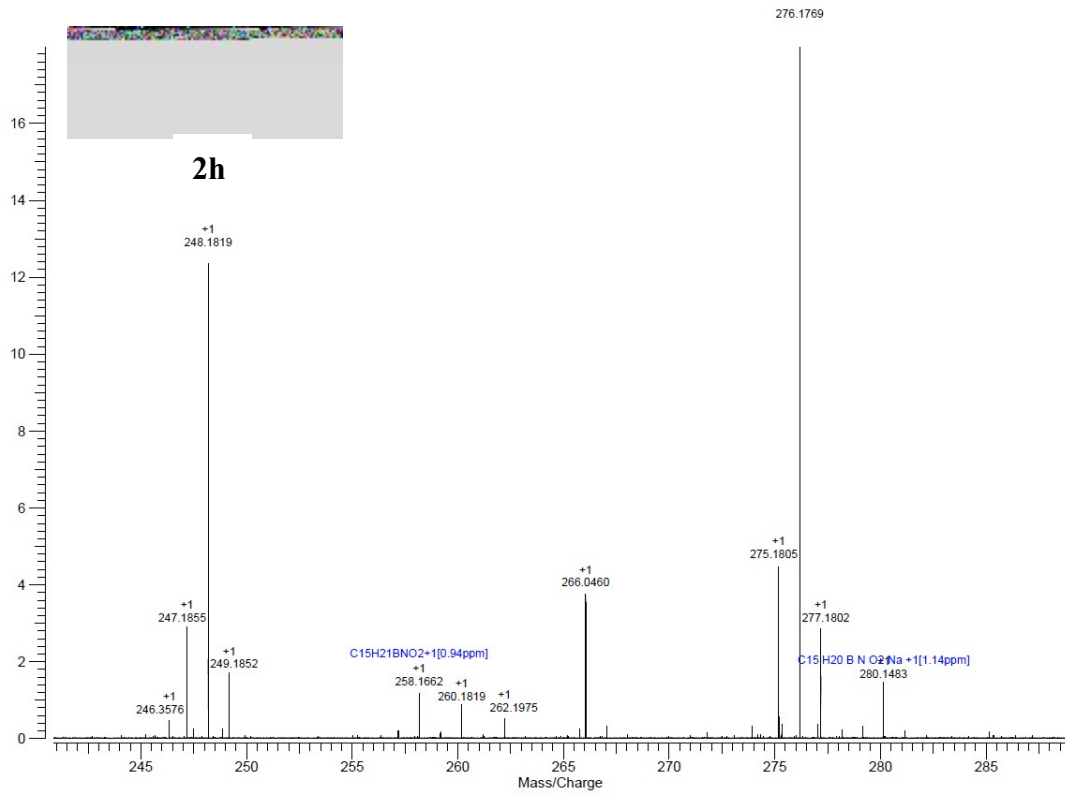

*N*-(1-(4-bromophenyl)-2-oxo-2-((4-(4,4,5,5-tetramethyl-1,3,2-dioxaborolan-2-yl)benzyl)amino)ethyl)-*N*-phenylisobutyramide (**3**)

<sup>1</sup>H-NMR (600 MHz, CDCl<sub>3</sub>)

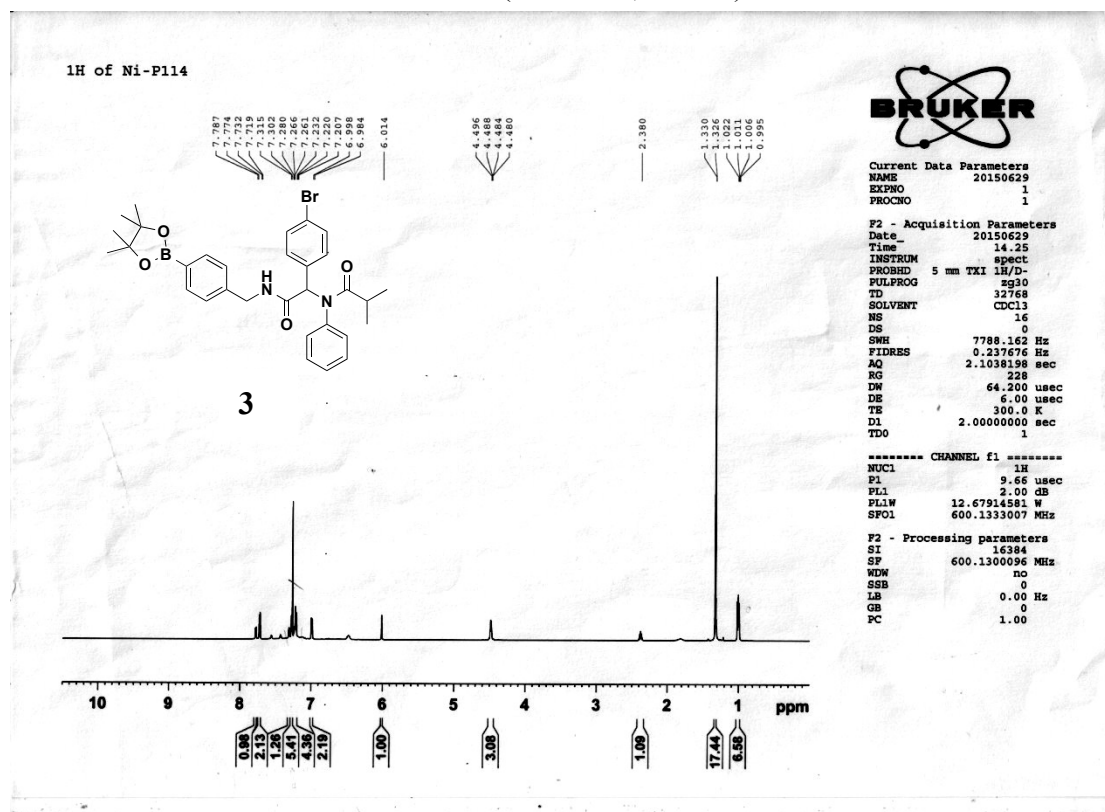

<sup>13</sup>C-NMR (150 MHz, CDCl<sub>3</sub>)

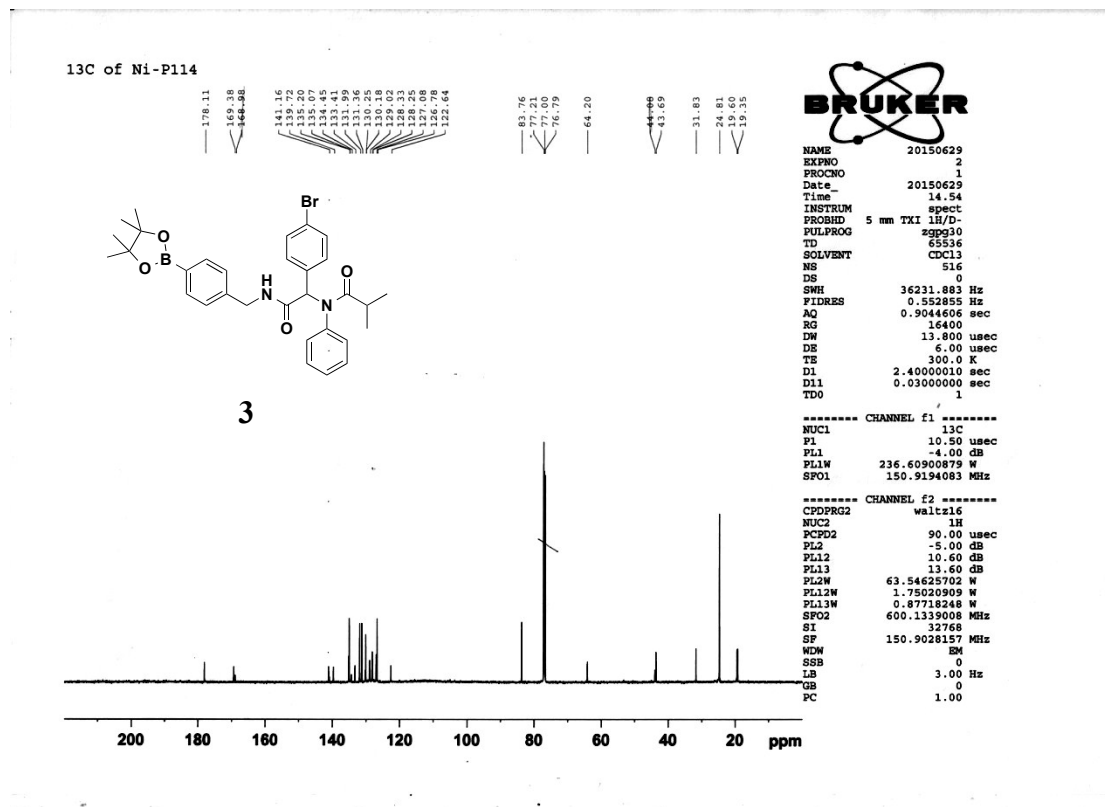



# $^{11}\text{B}$ -NMR (193 MHz, $\text{CDCl}_3$ )

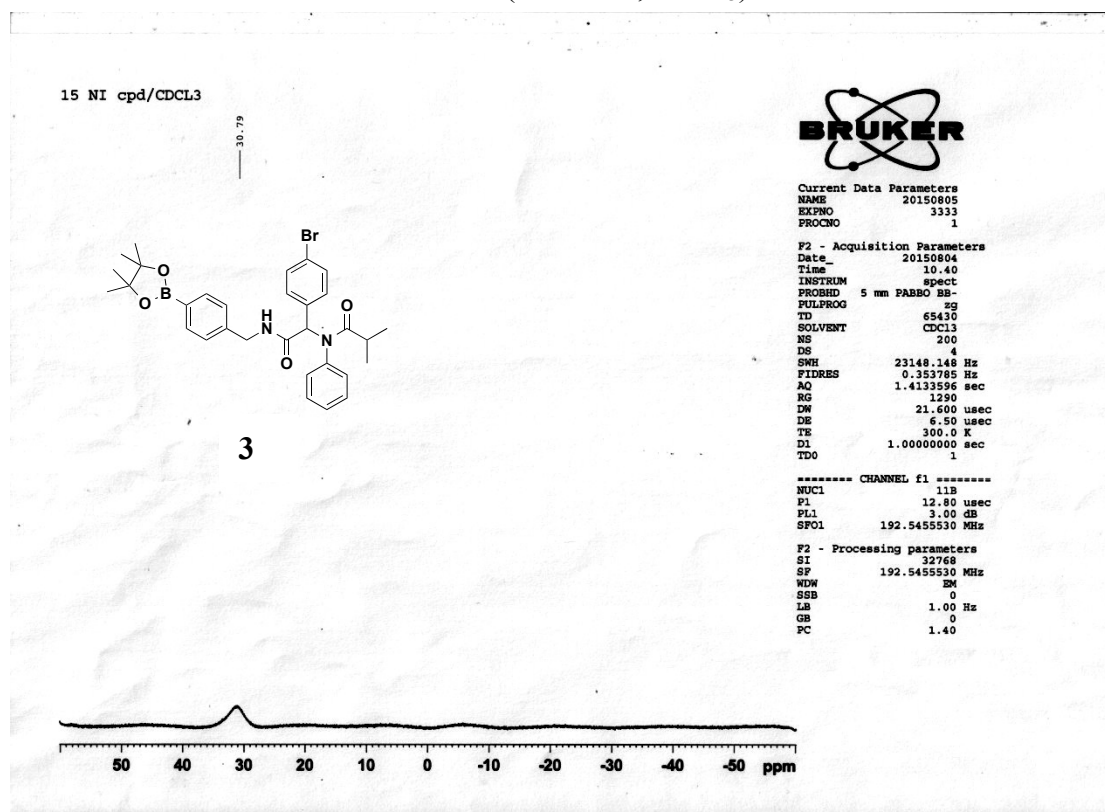

## HRMS

Varian MS  
File: D:\2015-06\0629\SMS0053020150629\_#114(HR)-1\_ESI.trans  
Base-Peak Amplitude: 15.3872 Total Intensity: 125.338 Scans: 1 Positive Ions  
Broadband ADC Rate: 2000000 ADC Gain: X1 Transient Points: 2048K

Remove Noises 29-JUN-2015 10:34:44

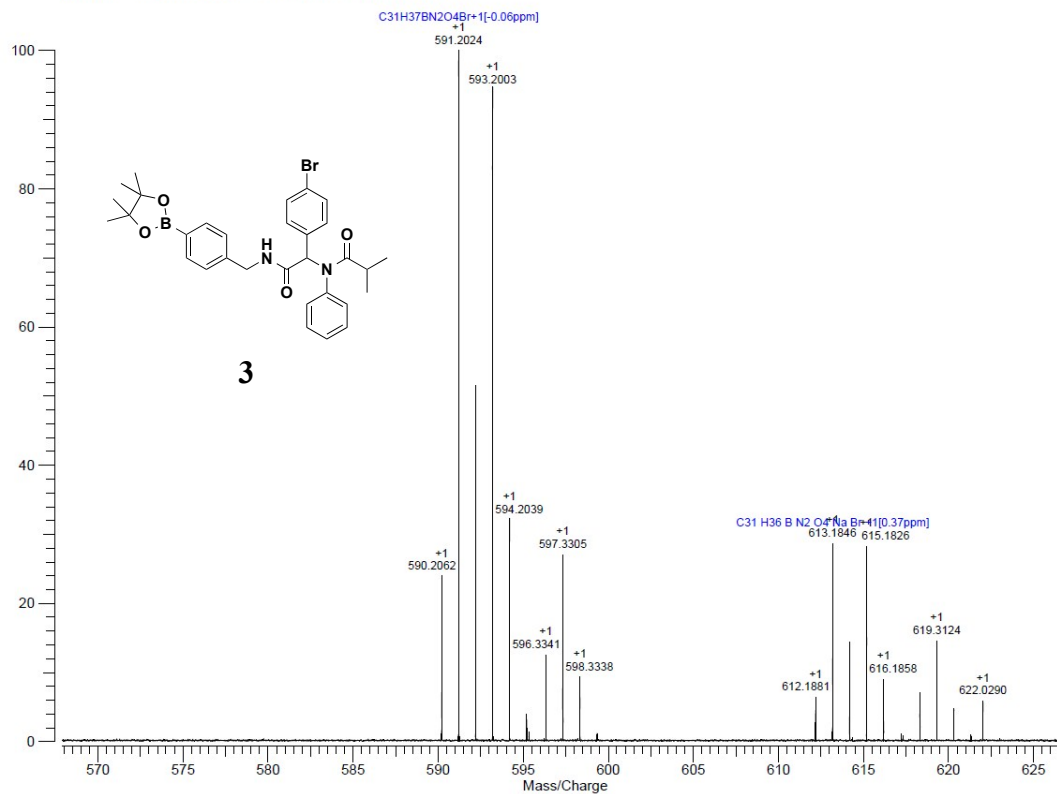

1-(4-bromophenyl)-2-((2-methyl-5-(4,4,5,5-tetramethyl-1,3,2-dioxaborolan-2-yl)benzyl)amino)-2-oxoethyl benzoate (4).

<sup>1</sup>H-NMR (600 MHz, CDCl<sub>3</sub>)

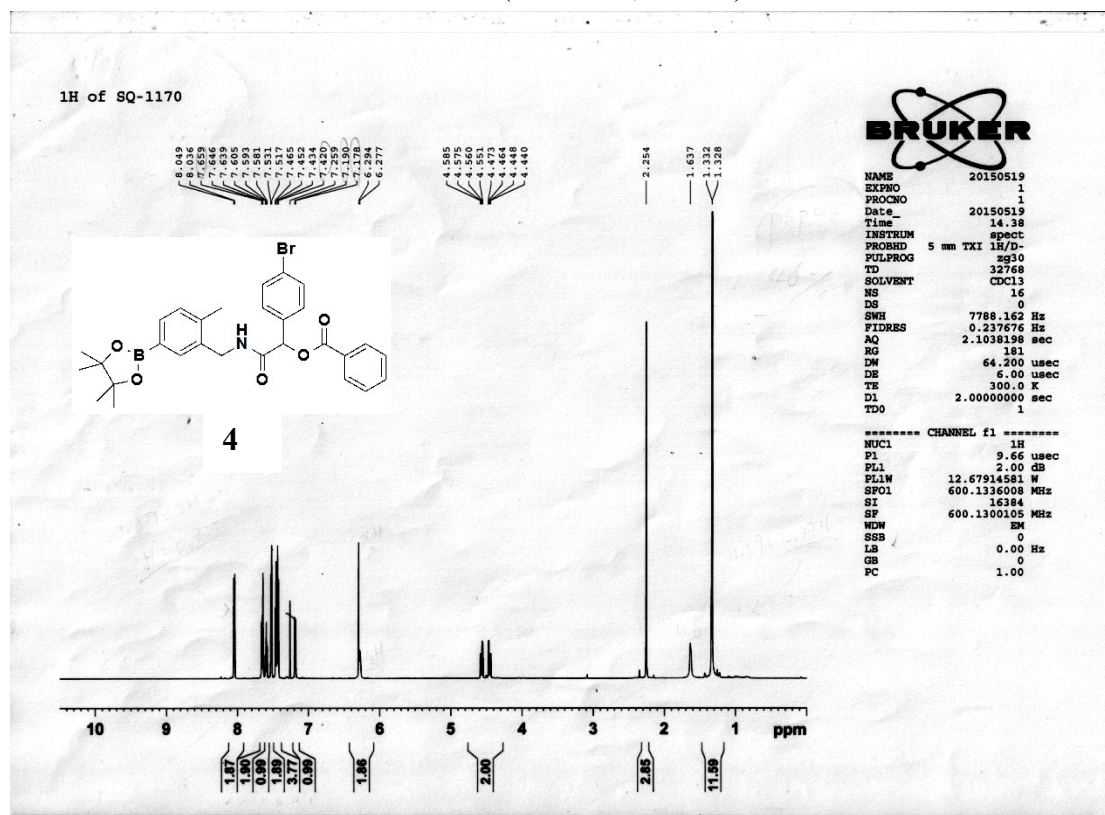

<sup>13</sup>C-NMR (150 MHz, CDCl<sub>3</sub>)

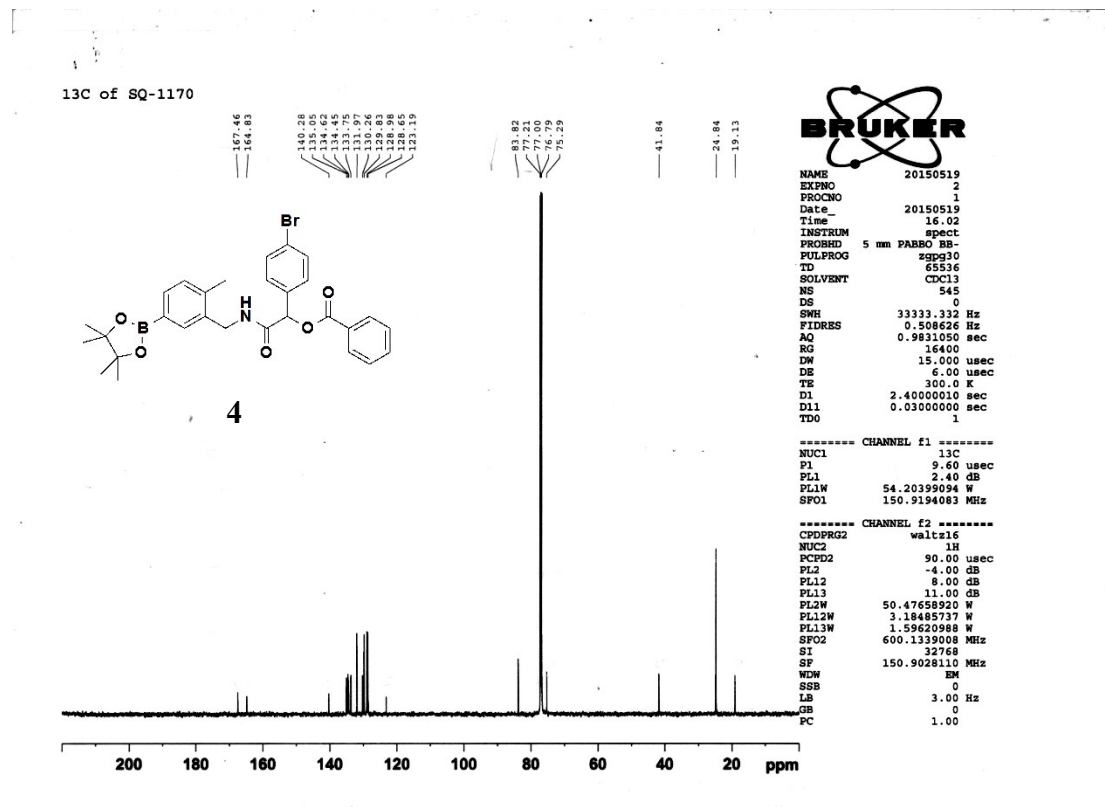

$^{11}\text{B}$ -NMR (193 MHz,  $\text{CDCl}_3$ )

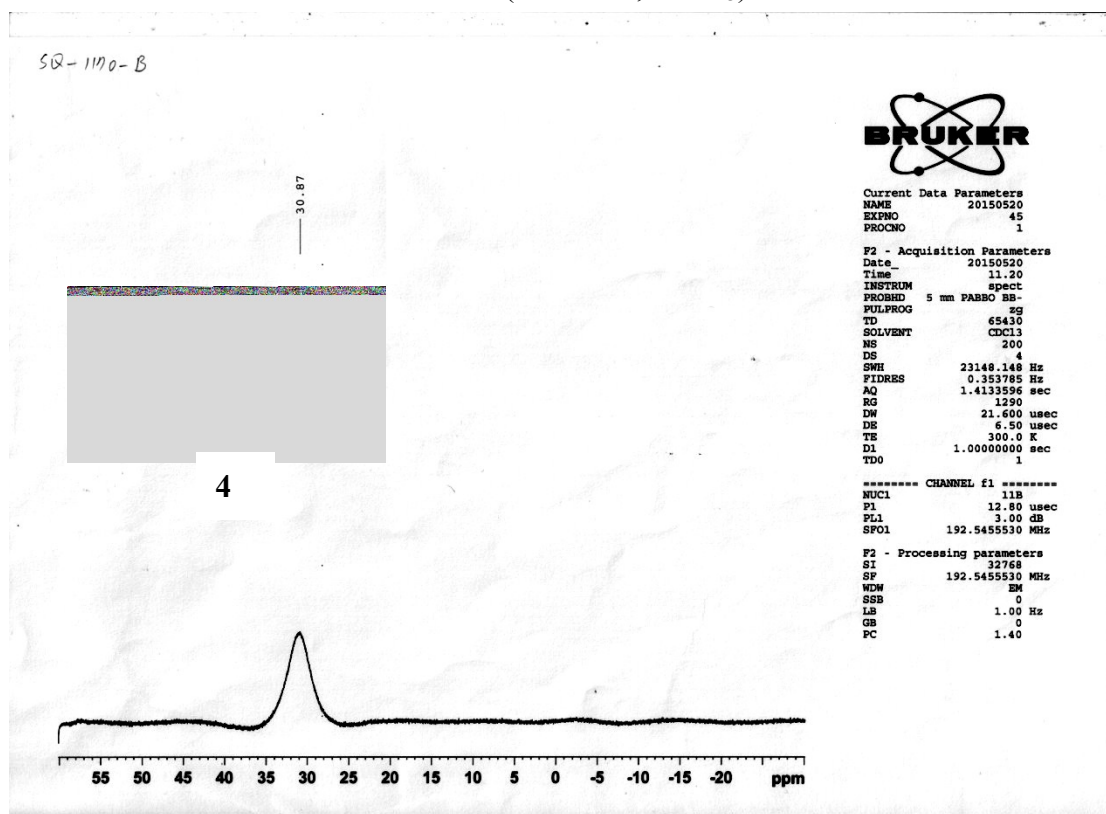

HRMS

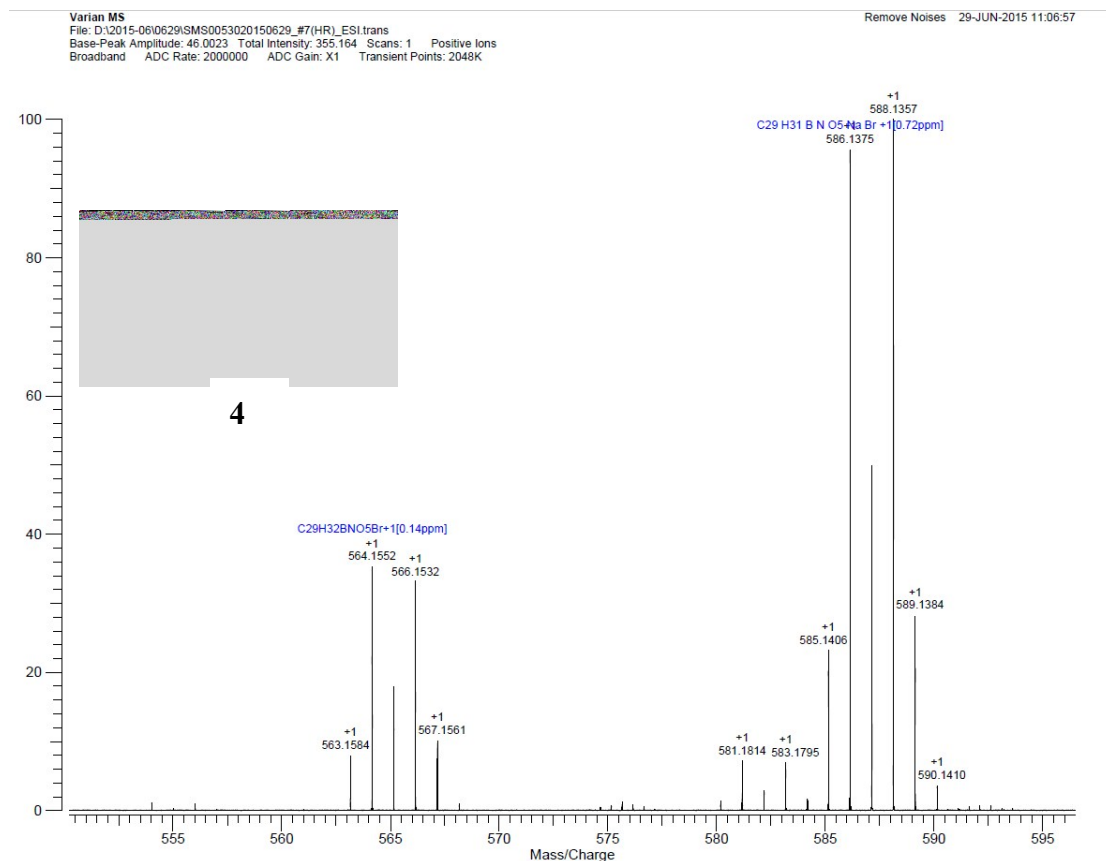

1-(4-chloro-3-(4,4,5,5-tetramethyl-1,3,2-dioxaborolan-2-yl)benzyl)-1H-tetrazole (5)  
<sup>1</sup>H-NMR (600 MHz, CDCl<sub>3</sub>)

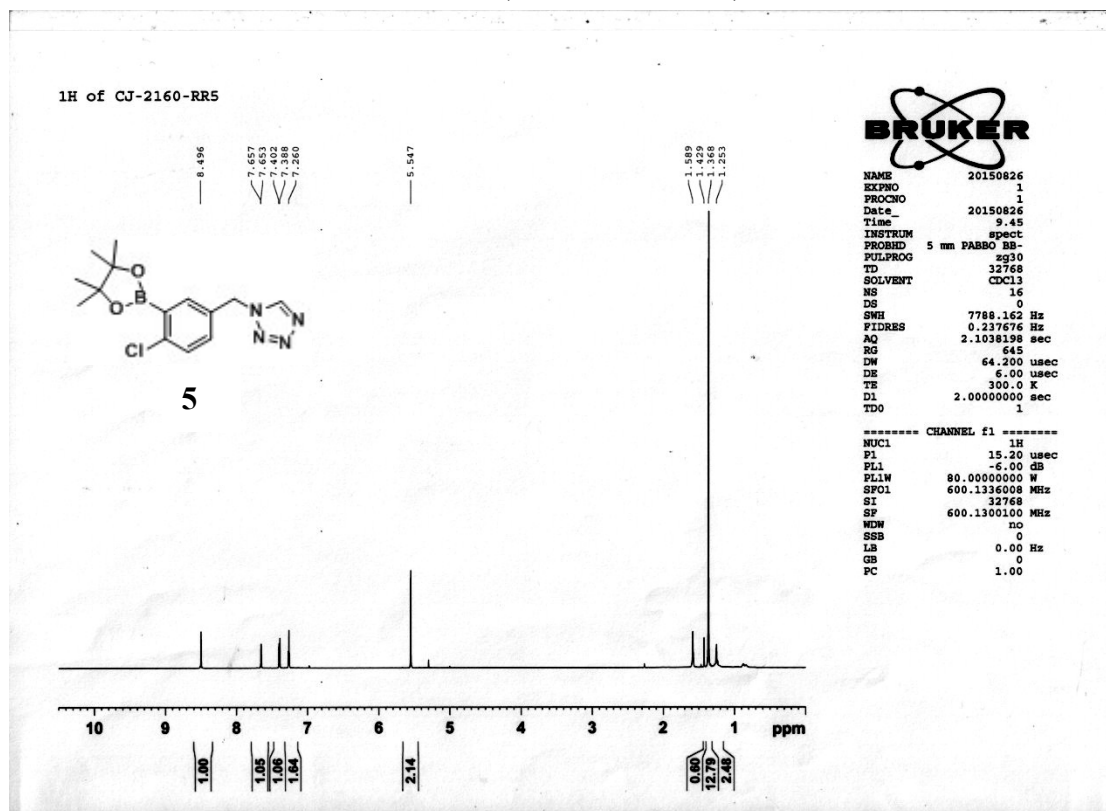

<sup>13</sup>C-NMR (150 MHz, CDCl<sub>3</sub>)

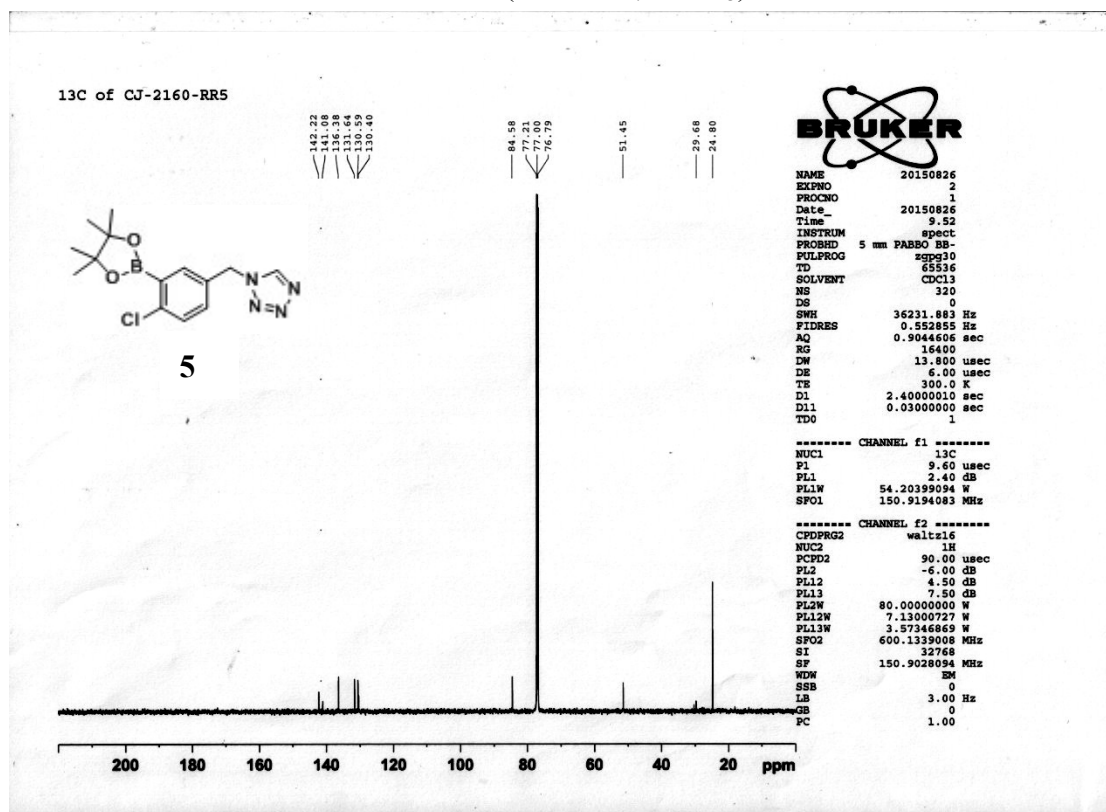

$^{11}\text{B}$ -NMR (193 MHz,  $\text{CDCl}_3$ )

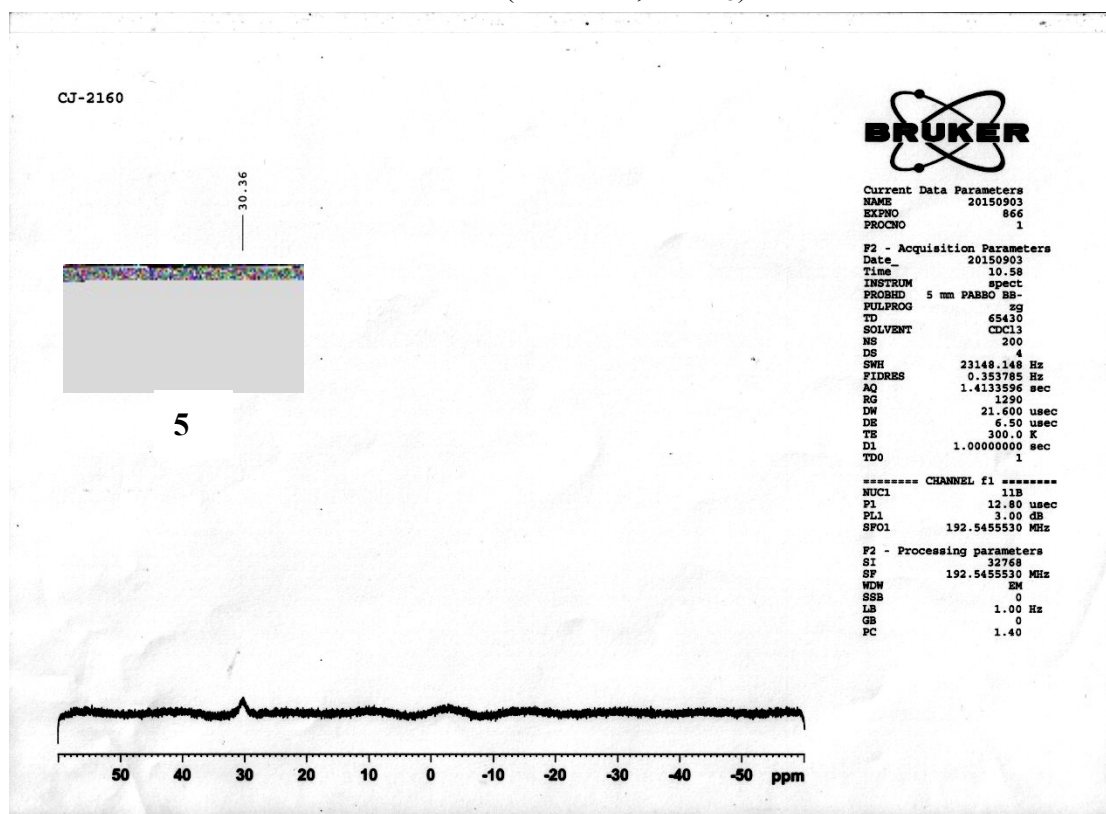

IR (KBr)

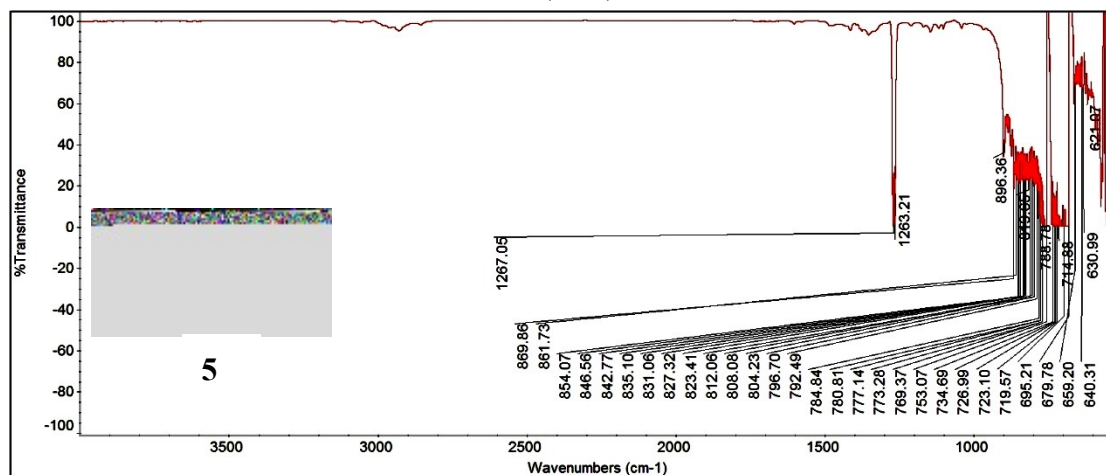

# HRMS

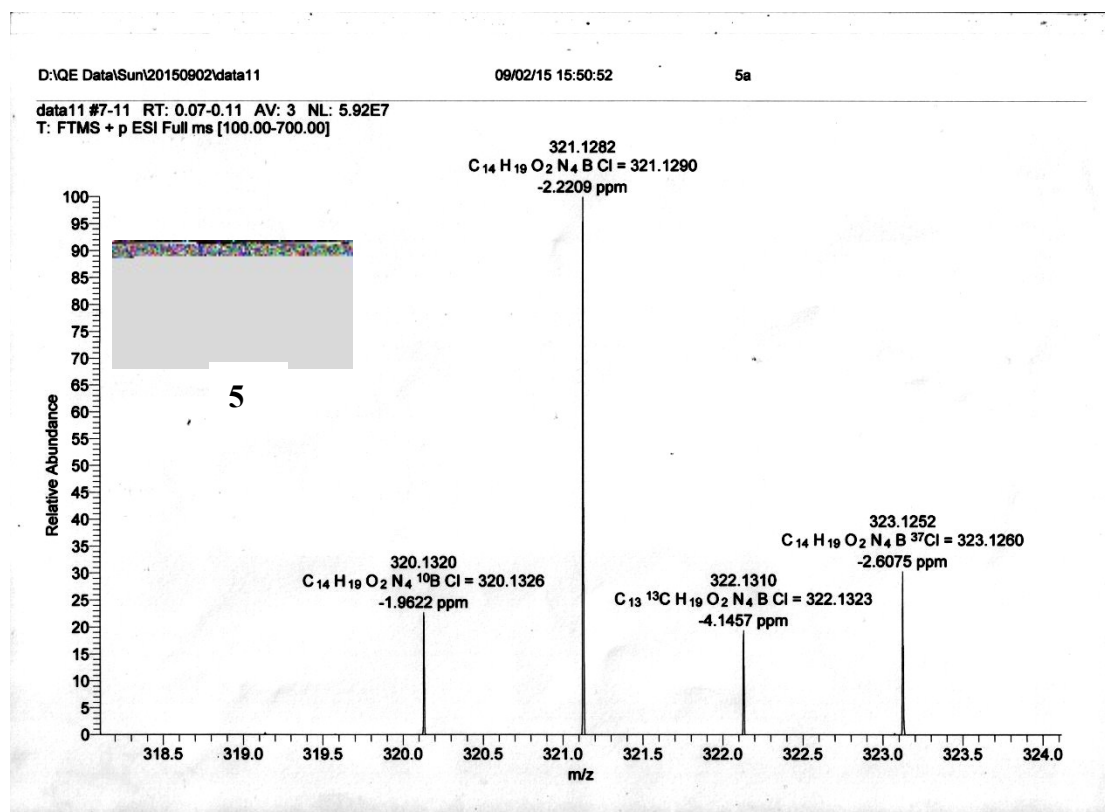

X-ray crystallographic analysis of 1-(4-chloro-3-(4,4,5,5-tetramethyl-1,3,2-dioxaborolan-2-yl)benzyl)-1*H*-tetrazole (**5**), thermal ellipsoids drawn at the 50% probability level.

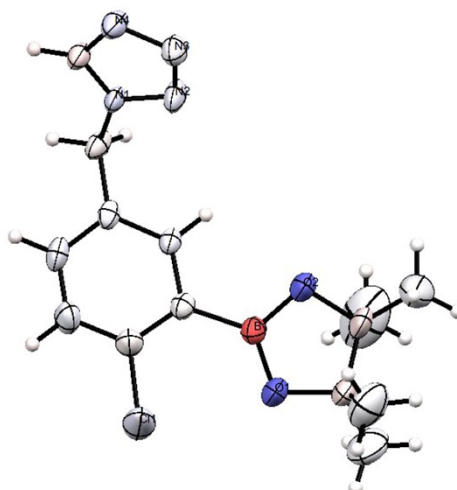

A clear pale-yellow column-like specimen of C<sub>14</sub>H<sub>18</sub>BClN<sub>4</sub>O<sub>2</sub>, approximate dimensions 0.50 mm x 0.22 mm x 0.02 mm, was used for the X-ray crystallographic analysis. The X-ray intensity data were collected.

Table 1. Crystal data and structure refinement for 17399.

|                                   |                                                            |                              |
|-----------------------------------|------------------------------------------------------------|------------------------------|
| Identification code               | 17399                                                      |                              |
| Empirical formula                 | $C_{14}H_{18}BClN_4O_2$                                    |                              |
| Formula weight                    | 320.58                                                     |                              |
| Temperature                       | 200(2) K                                                   |                              |
| Wavelength                        | 0.71073 Å                                                  |                              |
| Crystal system                    | Monoclinic                                                 |                              |
| Space group                       | P 21/c                                                     |                              |
| Unit cell dimensions              | $a = 15.8491(11)$ Å                                        | $\alpha = 90^\circ$ .        |
|                                   | $b = 10.2222(8)$ Å                                         | $\beta = 101.018(3)^\circ$ . |
|                                   | $c = 10.1374(8)$ Å                                         | $\gamma = 90^\circ$ .        |
| Volume                            | $1612.1(2)$ Å <sup>3</sup>                                 |                              |
| Z                                 | 4                                                          |                              |
| Density (calculated)              | 1.321 Mg/m <sup>3</sup>                                    |                              |
| Absorption coefficient            | 0.248 mm <sup>-1</sup>                                     |                              |
| F(000)                            | 672                                                        |                              |
| Crystal size                      | 0.50 x 0.22 x 0.02 mm <sup>3</sup>                         |                              |
| Theta range for data collection   | 1.31 to 25.06°.                                            |                              |
| Index ranges                      | $-18 \leq h \leq 18, -8 \leq k \leq 12, -12 \leq l \leq 8$ |                              |
| Reflections collected             | 7566                                                       |                              |
| Independent reflections           | 2851 [R(int) = 0.0357]                                     |                              |
| Completeness to theta = 25.06°    | 99.9 %                                                     |                              |
| Absorption correction             | multi-scan                                                 |                              |
| Max. and min. transmission        | 0.9951 and 0.8860                                          |                              |
| Refinement method                 | Full-matrix least-squares on F <sup>2</sup>                |                              |
| Data / restraints / parameters    | 2851 / 0 / 199                                             |                              |
| Goodness-of-fit on F <sup>2</sup> | 1.062                                                      |                              |
| Final R indices [I > 2sigma(I)]   | R1 = 0.0626, wR2 = 0.1745                                  |                              |
| R indices (all data)              | R1 = 0.0896, wR2 = 0.2057                                  |                              |
| Largest diff. peak and hole       | 0.681 and -0.379 e.Å <sup>-3</sup>                         |                              |

1-(4-(4,4,5,5-tetramethyl-1,3,2-dioxaborolan-2-yl)phenyl)-1H-tetrazole (6)

<sup>1</sup>H-NMR (600 MHz, CDCl<sub>3</sub>)

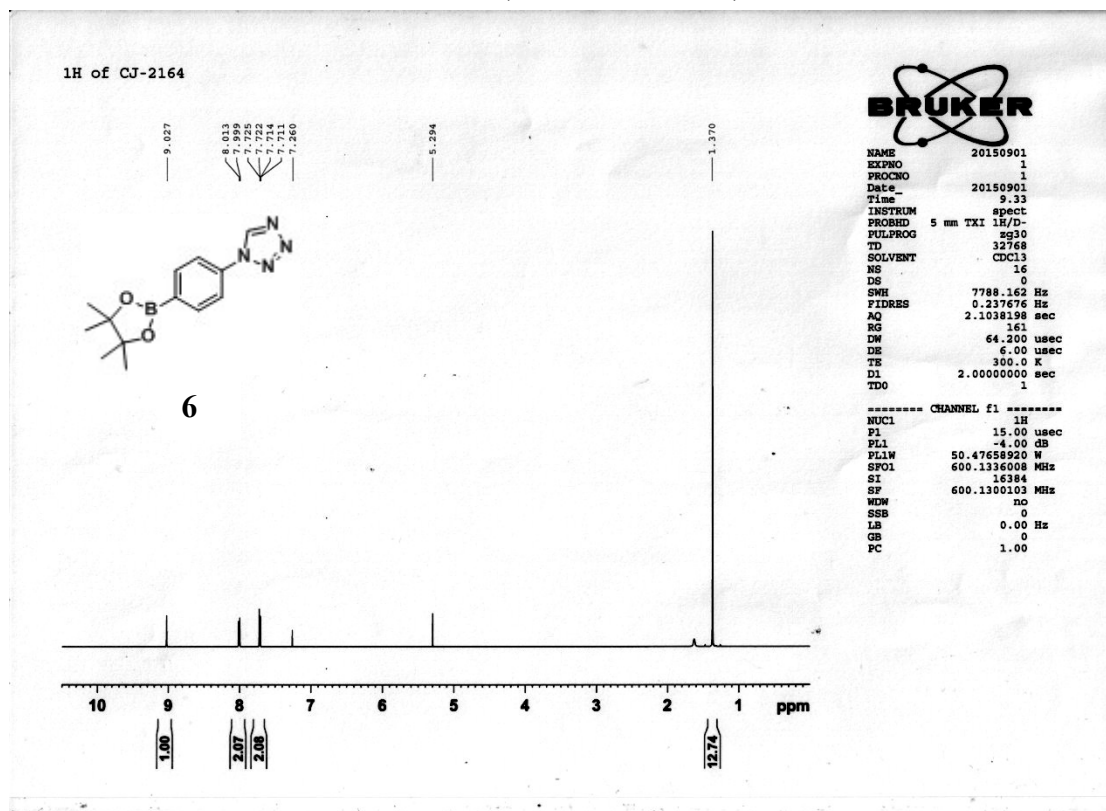

<sup>13</sup>C-NMR (150 MHz, CDCl<sub>3</sub>)

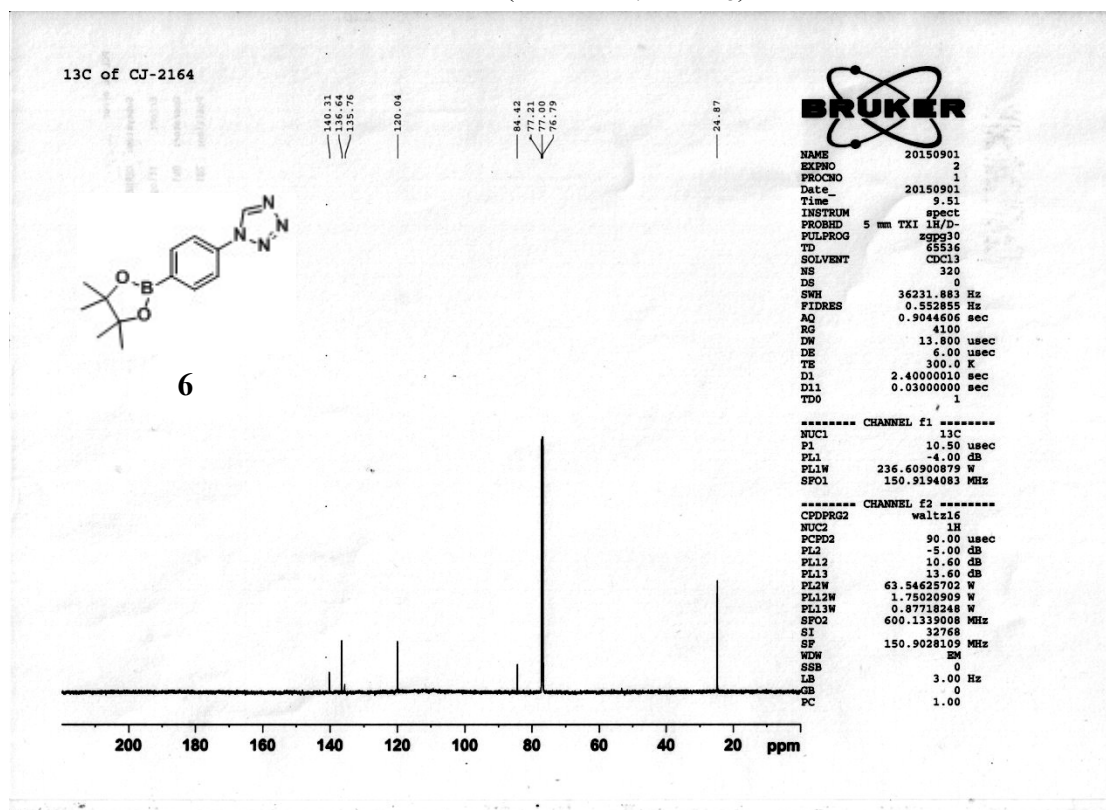



$^{11}\text{B}$ -NMR (193 MHz,  $\text{CDCl}_3$ )

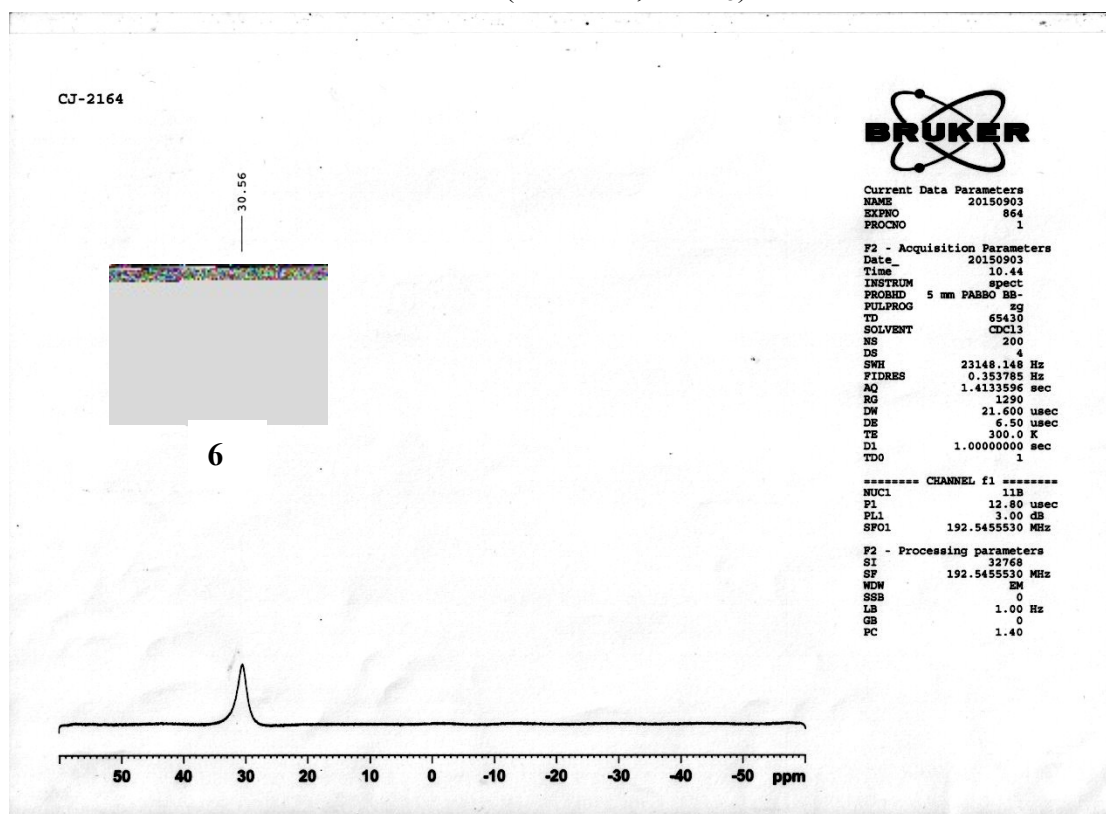

IR (KBr)

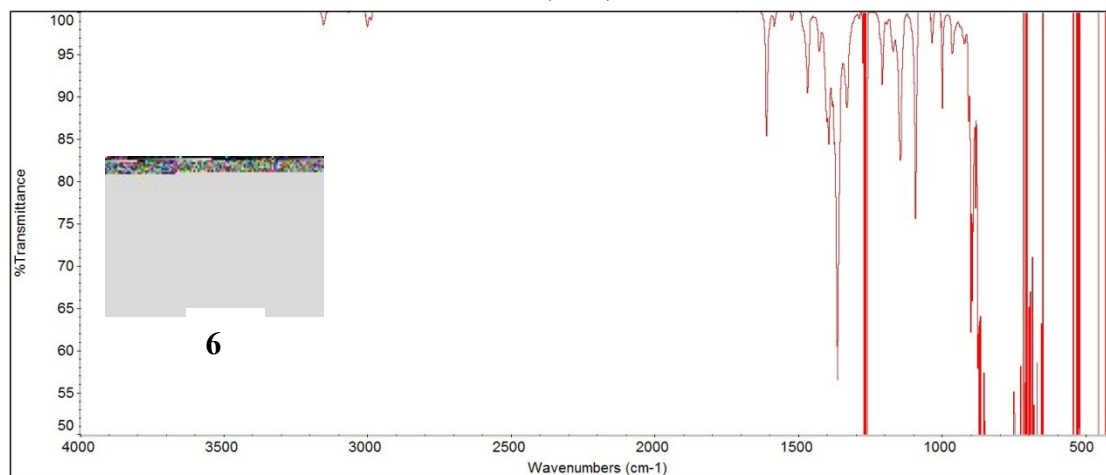

# HRMS

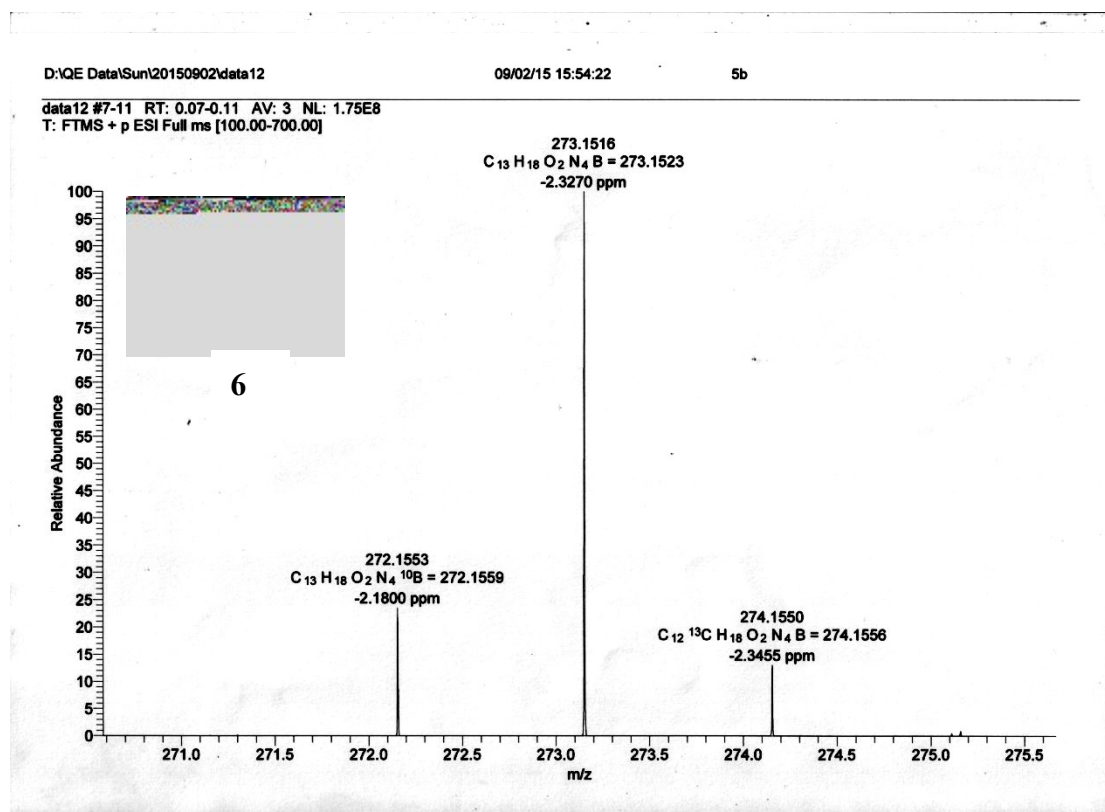

X-ray crystallographic analysis of 1-(4-(4,4,5,5-tetramethyl-1,3,2-dioxaborolan-2-yl)phenyl)-1*H*-tetrazole (**6**), thermal ellipsoids drawn at the 50% probability level.

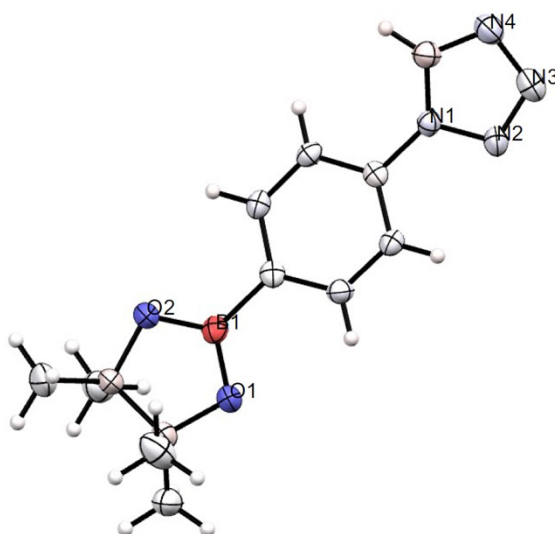

A clear light-yellow column-like specimen of C<sub>13</sub>H<sub>17</sub>BN<sub>4</sub>O<sub>2</sub>, approximate

dimensions 0.22 mm x 0.19 mm x 0.02 mm, was used for the X-ray crystallographic analysis. The X-ray intensity data were collected.

Table 1. Crystal data and structure refinement for a17398.

|                                   |                                                                |                  |
|-----------------------------------|----------------------------------------------------------------|------------------|
| Identification code               | a17398                                                         |                  |
| Empirical formula                 | C <sub>13</sub> H <sub>17</sub> BN <sub>4</sub> O <sub>2</sub> |                  |
| Formula weight                    | 272.12                                                         |                  |
| Temperature                       | 200(2) K                                                       |                  |
| Wavelength                        | 0.71073 Å                                                      |                  |
| Crystal system                    | Monoclinic                                                     |                  |
| Space group                       | P 21/c                                                         |                  |
| Unit cell dimensions              | a = 17.6880(11) Å                                              | α = 90°.         |
|                                   | b = 6.9800(8) Å                                                | β = 108.949(5)°. |
|                                   | c = 11.9076(9) Å                                               | γ = 90°.         |
| Volume                            | 1390.5(2) Å <sup>3</sup>                                       |                  |
| Z                                 | 4                                                              |                  |
| Density (calculated)              | 1.300 Mg/m <sup>3</sup>                                        |                  |
| Absorption coefficient            | 0.089 mm <sup>-1</sup>                                         |                  |
| F(000)                            | 576                                                            |                  |
| Crystal size                      | 0.22 x 0.19 x 0.02 mm <sup>3</sup>                             |                  |
| Theta range for data collection   | 2.43 to 25.01°.                                                |                  |
| Index ranges                      | -19 ≤ h ≤ 21, -7 ≤ k ≤ 8, -13 ≤ l ≤ 14                         |                  |
| Reflections collected             | 7550                                                           |                  |
| Independent reflections           | 2442 [R(int) = 0.0487]                                         |                  |
| Completeness to theta = 25.01°    | 99.4 %                                                         |                  |
| Absorption correction             | multi-scan                                                     |                  |
| Max. and min. transmission        | 0.9982 and 0.9806                                              |                  |
| Refinement method                 | Full-matrix least-squares on F <sup>2</sup>                    |                  |
| Data / restraints / parameters    | 2442 / 0 / 181                                                 |                  |
| Goodness-of-fit on F <sup>2</sup> | 1.012                                                          |                  |
| Final R indices [I > 2σ(I)]       | R1 = 0.0503, wR2 = 0.1003                                      |                  |
| R indices (all data)              | R1 = 0.0966, wR2 = 0.1169                                      |                  |
| Largest diff. peak and hole       | 0.182 and -0.179 e.Å <sup>-3</sup>                             |                  |

## Calculation methods

All the calculation results were performed by Gaussian 09 software.<sup>1</sup> The optimized structure of 2a was obtained at DFT/B3LYP/6-31G(d,p) method.<sup>2-4</sup> Projected density of state (pDOS) analysis and related molecular diagrams of HOMO and LUMO were achieved by using the pop = full keyword under the calculation procedure of DFT/B3LYP/6-31G(d,p) method.

## REFERENCES

- 1 M. J. Frisch, G. W. Trucks, H. B. Schlegel, G. E. Scuseria, J. R. Cheeseman, M. A. Robb, G. Scalmani, V. Barone, B. Mennucci, G. A. Petersson, H. Nakatsuji, M. Caricato, X. Li, H. P. Hratchian, A. F. Izmaylov, J. Bloino, G. Zheng, J. L. Sonnenberg, M. Hada, M. Ehara, K. Toyota, R. Fukuda, J. Ishida, M. Hasegawa, T. Nakajima, Y. Honda, O. Kitao, H. Nakai, T. Vreven, J. A. Montgomery Jr., J. E. Peralta, F. Ogliaro, M. Bearpark, J. J. Heyd, E. Brothers, K. N. Kudin, V. N. Staroverov, R. Kobayashi, J. Normand, A. Raghavachari, A. Rendell, J. C. Burant, S. S. Iyengar, J. Tomasi, M. Cossi, N. Rega, J. M. Millan, M. Klene, J. E. Knox, J. B. Cross, V. Bakken, C. Adamo, J. Jaramillo, R. Gomperts, R. E. Stratmann, O. Yazyev, A. J. Austin, R. Cammi, C. Pomelli, J. W. Ochterski, R. L. Martin, K. Morokuma, V. G. Zakrzewski, G. A. Voth, P. Salvador, J. J. Dannerberg, S. Dapprich, A. D. Daniels, J. Farkas, B. Foresman, J. V. Ortiz, J. Cioslowski, D. J. Fox, GAUSSIAN 09, Revision, Gaussian Inc., Wallingford, CT, 2009.
- 2 A. D. Becke, *J. Chem. Phys.*, 1993, **98**, 5648.
- 3 B. Miehlich, A. Savin, H. Stoll, H. Preuss, *Chem. Phys. Lett.* 1989, **157**, 200.
- 4 C. Lee, W. Yang, R.G. Parr, *Phys. Rev. B.*, 1988, **37**, 785.
